# Supplementary material
Source: PubMed Central journal article supplement (PMC3342856)

**Table S1.** Cross-validation testing the robustness of the classifier. Validation is repeated for the ten possible combinations of selecting different batches as training and test set.

**Table S2.** A) Mapping of capture probes to the latest rev. 17.0 of miRbase (mature miRNAs). B) Mapping of capture probes to the latest rev. 17.0 of miRbase (premiRs).

**Figure S1. Unsupervised hierarchical clustering.** Heat-map and two-way unsupervised hierarchical clustering based on the 209 most variable miRNAs ( $SD > 0.2$ ) showing almost complete separation of the 148 arrays into non-malignant (top bar, green label) and malignant (top bar, red label) samples.

**Figure S2. Predictor discovery by nearest shrunken centroids.** Classifier training was performed with microarray expression measurements of the top-3 most significantly induced and top-3 most significantly repressed microRNAs in the training set. **A.** The effect of increasing the centroid threshold value on the classification error. Error bars calculated from 10-fold cross validation of the training set samples. **B.** Relative contributions of each miRNA in the BDN and CTCL shrunken centroids, quantified as the distance to the overall centroid.

**Figure S3. Performance of next-best sets of miRNAs for classification.** Excluding the miRNAs selected for classification in the previous round, miRNAs were selected and a nearest shrunken centroid classifier trained on the remaining set of miRNAs, and the accuracy in training and test set plotted. The number of miRNAs in the trained classifier in each round depends on the extent of the shrinking.

**Figure S4. miR-21 expressions measured by microarray for all sub indications included in the study.** miR-21 expressions are grouped according to sub indication (abbreviations as in table 1).

**Figure S5.** *miRNA classification is robust and resistant to topical steroid treatment of psoriasis patients.* **A.** Classification performance. **B.** Bar plots of the relative expression of the individual classifier miRNAs. **C.** Total Clinical Score (TCS). The TCS is defined as the sum (from 0 to 9) of clinical scoring of erythema, scaling, and infiltration (each on a scale from 0 to 3). The TCS was obtained at the initiation and after 29 days of topical treatment with steroid of three patients with plaque psoriasis.

**Figure S6.** *Expression of miR-711 measured by TaqMan qRT-PCR.* Expression is grouped according to patient type (BDN and CTCL respectively). Within each group, there is a small scatter on the x-axis to allow better visualization of all measurements.

**Figure S7.** *qRT-PCR-based classification of samples from patients with Benign dermatosis (BDN) and Mycosis Fungoides (MF).* A Cp based sample score (S) was calculated for each sample (see Fig. 7). MF patients are ordered according to clinical stages (I to IV) and thick grey lines indicate mean sample score in each stage and for the BDN samples. Patients with a sample score below 6.52 (black solid line) are being classified as CTCL (c.f. Fig. 7). The dotted lines show the cut-offs for the low confidence region. Using non-parametric Wilcoxon rank-sum test, we test for significance of differences in mean sample score between BDN and each of the MF stages, and get  $P=2.3e-4$  (MF I vs BDN),  $P=2.7e-7$  (MF II vs BDN),  $P=0.093$  (MF III vs BDN, only one MF III sample), and  $P=5.1e-6$  (MF IV vs BDN).

Table S1

| Round | Batches selected for test set | n test (CTCL) | n test (BDN) | Batches selected for training set | n (CTCL) | n (BDN) | Accuracy (train) | Accuracy (test) | miRNAs in classifier              |
|-------|-------------------------------|---------------|--------------|-----------------------------------|----------|---------|------------------|-----------------|-----------------------------------|
| 1     | 1,2                           | 25            | 34           | 3,4,5                             | 38       | 51      | 0.94             | 0.95            | 203, 205, 299-5p, 663b, 711, 718  |
| 2     | 1,3                           | 25            | 33           | 2,4,5                             | 38       | 52      | 0.93             | 0.97            | 203, 205, 326, 663b, 711          |
| 3     | 1,4                           | 27            | 34           | 2,3,5                             | 36       | 51      | 0.95             | 0.89            | 203, 326, 663b, 718, 1252, 1249   |
| 4     | 1,5                           | 25            | 35           | 2,3,4                             | 38       | 50      | 0.95             | 0.92            | 203, 205, 663b, 711, 718, 1252    |
| 5     | 2,3                           | 24            | 33           | 1,4,5                             | 39       | 52      | 0.91             | 0.98            | 203, 205, 299-5p, 663b, 711       |
| 6     | 2,4                           | 26            | 34           | 1,3,5                             | 37       | 51      | 0.95             | 0.92            | 34b, 203, 663b, 1249, 1252        |
| 7     | 2,5                           | 24            | 35           | 1,3,4                             | 39       | 50      | 0.94             | 0.93            | 34b, 203, 205, 299-5p, 663b, 1249 |
| 8     | 3,4                           | 26            | 33           | 1,2,5                             | 37       | 52      | 0.93             | 0.94            | 203, 205, 663b, 665, 1252         |
| 9     | 3,5                           | 24            | 34           | 1,2,4                             | 39       | 51      | 0.93             | 0.93            | 203, 205, 663b, 711, 1285         |
| 10    | 4,5                           | 26            | 35           | 1,2,3                             | 37       | 50      | 0.97             | 0.89            | 203, 490-3p, 663b, 1249, 1252     |

Table S2A

| Probe_ID | miR_ID miRBase 15.0 | # targets | MIMAT ID     | miR_ID miRBase 17.0 |
|----------|---------------------|-----------|--------------|---------------------|
| 17748    | blank               | 1         | MIMAT0000062 | hsa-let-7a          |
| 146011   | hsa-let-7a          | 1         | MIMAT0000062 | hsa-let-7a          |
| 42530    | hsa-let-7a-2*       | 1         | MIMAT0010195 | hsa-let-7a-2*       |
| 17888    | hsa-let-7a*         | 1         | MIMAT0004481 | hsa-let-7a*         |
| 17749    | hsa-let-7b          | 1         | MIMAT0000063 | hsa-let-7b          |
| 42769    | hsa-let-7b*         | 1         | MIMAT0004482 | hsa-let-7b*         |
| 145820   | hsa-let-7c          | 1         | MIMAT0000064 | hsa-let-7c          |
| 19004    | blank               | 1         | MIMAT0000064 | hsa-let-7c          |
| 46437    | blank               | 1         | MIMAT0000065 | hsa-let-7d          |
| 145968   | hsa-let-7d          | 1         | MIMAT0000065 | hsa-let-7d          |
| 145633   | hsa-let-7d*         | 1         | MIMAT0004484 | hsa-let-7d*         |
| 46436    | blank               | 1         | MIMAT0000066 | hsa-let-7e          |
| 145846   | hsa-let-7e          | 1         | MIMAT0000066 | hsa-let-7e          |
| 42743    | hsa-let-7e*         | 1         | MIMAT0004485 | hsa-let-7e*         |
| 17752    | hsa-let-7f          | 1         | MIMAT0000067 | hsa-let-7f          |
| 46435    | blank               | 1         | MIMAT0000067 | hsa-let-7f          |
| 145840   | hsa-let-7f-1*       | 1         | MIMAT0004486 | hsa-let-7f-1*       |
| 42742    | hsa-let-7f-2*       | 1         | MIMAT0004487 | hsa-let-7f-2*       |
| 46438    | hsa-let-7g          | 1         | MIMAT0000414 | hsa-let-7g          |
| 42778    | hsa-let-7g*         | 1         | MIMAT0004584 | hsa-let-7g*         |
| 9938     | hsa-let-7i          | 1         | MIMAT0000415 | hsa-let-7i          |
| 145746   | hsa-let-7i*         | 1         | MIMAT0004585 | hsa-let-7i*         |
| 10916    | hsa-miR-1           | 1         | MIMAT0000416 | hsa-miR-1           |
| 145943   | hsa-miR-100         | 1         | MIMAT0000098 | hsa-miR-100         |
| 145694   | hsa-miR-100*        | 1         | MIMAT0004512 | hsa-miR-100*        |
| 31026    | hsa-miR-101         | 1         | MIMAT0000099 | hsa-miR-101         |
| 17935    | hsa-miR-101*        | 1         | MIMAT0004513 | hsa-miR-101*        |
| 10919    | hsa-miR-103         | 1         | MIMAT0000101 | hsa-miR-103a        |
| 146223   | hsa-miR-103-2*      | 1         | MIMAT0009196 | hsa-miR-103a-2*     |
| 146033   | hsa-miR-103-as      | 1         | MIMAT0007402 | hsa-miR-103b        |
| 5250     | hsa-miR-105         | 1         | MIMAT0000102 | hsa-miR-105         |
| 42562    | hsa-miR-105*        | 1         | MIMAT0004516 | hsa-miR-105*        |
| 46801    | hsa-miR-106a        | 1         | MIMAT0000103 | hsa-miR-106a        |
| 42508    | hsa-miR-106a*       | 1         | MIMAT0004517 | hsa-miR-106a*       |
| 19582    | hsa-miR-106b        | 1         | MIMAT0000680 | hsa-miR-106b        |
| 17854    | hsa-miR-106b*       | 1         | MIMAT0004672 | hsa-miR-106b*       |
| 10923    | hsa-miR-107         | 1         | MIMAT0000104 | hsa-miR-107         |
| 13485    | hsa-miR-10a         | 1         | MIMAT0000253 | hsa-miR-10a         |
| 28019    | hsa-miR-10a*        | 1         | MIMAT0004555 | hsa-miR-10a*        |
| 10925    | hsa-miR-10b         | 1         | MIMAT0000254 | hsa-miR-10b         |
| 42969    | hsa-miR-10b*        | 1         | MIMAT0004556 | hsa-miR-10b*        |
| 46822    | hsa-miR-1178        | 1         | MIMAT0005823 | hsa-miR-1178        |
| 46735    | hsa-miR-1179        | 1         | MIMAT0005824 | hsa-miR-1179        |
| 42848    | hsa-miR-1180        | 1         | MIMAT0005825 | hsa-miR-1180        |
| 46675    | hsa-miR-1181        | 1         | MIMAT0005826 | hsa-miR-1181        |
| 46738    | hsa-miR-1182        | 1         | MIMAT0005827 | hsa-miR-1182        |
| 46880    | hsa-miR-1183        | 1         | MIMAT0005828 | hsa-miR-1183        |
| 46258    | hsa-miR-1184        | 1         | MIMAT0005829 | hsa-miR-1184        |
| 46419    | hsa-miR-1185        | 1         | MIMAT0005798 | hsa-miR-1185        |
| 46617    | hsa-miR-1197        | 1         | MIMAT0005955 | hsa-miR-1197        |
| 46272    | hsa-miR-1200        | 1         | MIMAT0005863 | hsa-miR-1200        |
| 46832    | hsa-miR-1202        | 1         | MIMAT0005865 | hsa-miR-1202        |

|        |                 |   |              |                 |
|--------|-----------------|---|--------------|-----------------|
| 46411  | hsa-miR-1203    | 1 | MIMAT0005866 | hsa-miR-1203    |
| 46791  | hsa-miR-1204    | 1 | MIMAT0005868 | hsa-miR-1204    |
| 46860  | hsa-miR-1205    | 1 | MIMAT0005869 | hsa-miR-1205    |
| 46779  | hsa-miR-1206    | 1 | MIMAT0005870 | hsa-miR-1206    |
| 46345  | hsa-miR-1207-3p | 1 | MIMAT0005872 | hsa-miR-1207-3p |
| 46565  | hsa-miR-1207-5p | 1 | MIMAT0005871 | hsa-miR-1207-5p |
| 46766  | hsa-miR-1208    | 1 | MIMAT0005873 | hsa-miR-1208    |
| 19583  | hsa-miR-122     | 1 | MIMAT0000421 | hsa-miR-122     |
| 42551  | hsa-miR-122*    | 1 | MIMAT0004590 | hsa-miR-122*    |
| 46800  | hsa-miR-1224-3p | 1 | MIMAT0005459 | hsa-miR-1224-3p |
| 46462  | hsa-miR-1224-5p | 1 | MIMAT0005458 | hsa-miR-1224-5p |
| 46684  | hsa-miR-1225-3p | 1 | MIMAT0005573 | hsa-miR-1225-3p |
| 46541  | hsa-miR-1225-5p | 1 | MIMAT0005572 | hsa-miR-1225-5p |
| 46309  | hsa-miR-1226    | 1 | MIMAT0005577 | hsa-miR-1226    |
| 46246  | hsa-miR-1226*   | 1 | MIMAT0005576 | hsa-miR-1226*   |
| 46806  | hsa-miR-1227    | 1 | MIMAT0005580 | hsa-miR-1227    |
| 46695  | hsa-miR-1228    | 1 | MIMAT0005583 | hsa-miR-1228    |
| 46222  | hsa-miR-1228*   | 1 | MIMAT0005582 | hsa-miR-1228*   |
| 46689  | hsa-miR-1229    | 1 | MIMAT0005584 | hsa-miR-1229    |
| 46531  | hsa-miR-1231    | 1 | MIMAT0005586 | hsa-miR-1231    |
| 46326  | hsa-miR-1233    | 1 | MIMAT0005588 | hsa-miR-1233    |
| 46696  | hsa-miR-1234    | 1 | MIMAT0005589 | hsa-miR-1234    |
| 46624  | hsa-miR-1236    | 1 | MIMAT0005591 | hsa-miR-1236    |
| 46850  | hsa-miR-1237    | 1 | MIMAT0005592 | hsa-miR-1237    |
| 46690  | hsa-miR-1238    | 1 | MIMAT0005593 | hsa-miR-1238    |
| 14328  | hsa-miR-124     | 1 | MIMAT0000422 | hsa-miR-124     |
| 42898  | hsa-miR-124*    | 1 | MIMAT0004591 | hsa-miR-124*    |
| 46439  | hsa-miR-1243    | 1 | MIMAT0005894 | hsa-miR-1243    |
| 46404  | hsa-miR-1244    | 1 | MIMAT0005896 | hsa-miR-1244    |
| 46321  | hsa-miR-1245    | 1 | MIMAT0005897 | hsa-miR-1245    |
| 46514  | hsa-miR-1246    | 1 | MIMAT0005898 | hsa-miR-1246    |
| 145977 | hsa-miR-1247    | 1 | MIMAT0005899 | hsa-miR-1247    |
| 46427  | hsa-miR-1248    | 1 | MIMAT0005900 | hsa-miR-1248    |
| 46210  | hsa-miR-1249    | 1 | MIMAT0005901 | hsa-miR-1249    |
| 46214  | hsa-miR-1250    | 1 | MIMAT0005902 | hsa-miR-1250    |
| 46275  | hsa-miR-1251    | 1 | MIMAT0005903 | hsa-miR-1251    |
| 46924  | hsa-miR-1252    | 1 | MIMAT0005944 | hsa-miR-1252    |
| 46707  | hsa-miR-1253    | 1 | MIMAT0005904 | hsa-miR-1253    |
| 46750  | hsa-miR-1254    | 1 | MIMAT0005905 | hsa-miR-1254    |
| 46380  | hsa-miR-1255a   | 1 | MIMAT0005906 | hsa-miR-1255a   |
| 46402  | hsa-miR-1255b   | 1 | MIMAT0005945 | hsa-miR-1255b   |
| 46717  | hsa-miR-1256    | 1 | MIMAT0005907 | hsa-miR-1256    |
| 46640  | hsa-miR-1257    | 1 | MIMAT0005908 | hsa-miR-1257    |
| 46869  | hsa-miR-1258    | 1 | MIMAT0005909 | hsa-miR-1258    |
| 17942  | hsa-miR-125a-3p | 1 | MIMAT0004602 | hsa-miR-125a-3p |
| 10928  | hsa-miR-125a-5p | 1 | MIMAT0000443 | hsa-miR-125a-5p |
| 30787  | hsa-miR-125b    | 1 | MIMAT0000423 | hsa-miR-125b    |
| 145838 | hsa-miR-125b-1* | 1 | MIMAT0004592 | hsa-miR-125b-1* |
| 42845  | hsa-miR-125b-2* | 1 | MIMAT0004603 | hsa-miR-125b-2* |
| 4610   | hsa-miR-126     | 1 | MIMAT0000445 | hsa-miR-126     |
| 33596  | hsa-miR-126*    | 1 | MIMAT0000444 | hsa-miR-126*    |
| 145975 | hsa-miR-1260    | 1 | MIMAT0005911 | hsa-miR-1260    |
| 46248  | hsa-miR-1261    | 1 | MIMAT0005913 | hsa-miR-1261    |

|        |                |   |              |                |
|--------|----------------|---|--------------|----------------|
| 46872  | hsa-miR-1262   | 1 | MIMAT0005914 | hsa-miR-1262   |
| 46747  | hsa-miR-1263   | 1 | MIMAT0005915 | hsa-miR-1263   |
| 46732  | hsa-miR-1264   | 1 | MIMAT0005791 | hsa-miR-1264   |
| 46737  | hsa-miR-1265   | 1 | MIMAT0005918 | hsa-miR-1265   |
| 46517  | hsa-miR-1266   | 1 | MIMAT0005920 | hsa-miR-1266   |
| 46633  | hsa-miR-1267   | 1 | MIMAT0005921 | hsa-miR-1267   |
| 46558  | hsa-miR-1268   | 2 | MIMAT0005922 | hsa-miR-1268   |
| 46558  | hsa-miR-1268   | 2 | MIMAT0018925 | hsa-miR-1268b  |
| 46746  | hsa-miR-1269   | 1 | MIMAT0005923 | hsa-miR-1269   |
| 42829  | hsa-miR-127-3p | 1 | MIMAT0000446 | hsa-miR-127-3p |
| 42692  | hsa-miR-127-5p | 1 | MIMAT0004604 | hsa-miR-127-5p |
| 46752  | hsa-miR-1270   | 1 | MIMAT0005924 | hsa-miR-1270   |
| 46627  | hsa-miR-1271   | 1 | MIMAT0005796 | hsa-miR-1271   |
| 46363  | hsa-miR-1272   | 1 | MIMAT0005925 | hsa-miR-1272   |
| 46623  | hsa-miR-1273   | 1 | MIMAT0005926 | hsa-miR-1273   |
| 46620  | hsa-miR-1275   | 1 | MIMAT0005929 | hsa-miR-1275   |
| 46642  | hsa-miR-1276   | 1 | MIMAT0005930 | hsa-miR-1276   |
| 46925  | hsa-miR-1277   | 1 | MIMAT0005933 | hsa-miR-1277   |
| 46361  | hsa-miR-1278   | 1 | MIMAT0005936 | hsa-miR-1278   |
| 45775  | hsa-miR-1279   | 1 | MIMAT0005937 | hsa-miR-1279   |
| 33902  | hsa-miR-128    | 1 | MIMAT0000424 | hsa-miR-128    |
| 46698  | hsa-miR-1280   | 1 | MIMAT0005946 | hsa-miR-1280   |
| 46634  | hsa-miR-1281   | 1 | MIMAT0005939 | hsa-miR-1281   |
| 46368  | hsa-miR-1282   | 1 | MIMAT0005940 | hsa-miR-1282   |
| 46367  | hsa-miR-1283   | 1 | MIMAT0005799 | hsa-miR-1283   |
| 46336  | hsa-miR-1284   | 1 | MIMAT0005941 | hsa-miR-1284   |
| 145981 | hsa-miR-1285   | 1 | MIMAT0005876 | hsa-miR-1285   |
| 46295  | hsa-miR-1286   | 1 | MIMAT0005877 | hsa-miR-1286   |
| 46440  | hsa-miR-1287   | 1 | MIMAT0005878 | hsa-miR-1287   |
| 46606  | hsa-miR-1288   | 1 | MIMAT0005942 | hsa-miR-1288   |
| 46340  | hsa-miR-1289   | 1 | MIMAT0005879 | hsa-miR-1289   |
| 145970 | hsa-miR-129-3p | 1 | MIMAT0004605 | hsa-miR-129-3p |
| 42467  | hsa-miR-129-5p | 1 | MIMAT0000242 | hsa-miR-129-5p |
| 42571  | hsa-miR-129*   | 1 | MIMAT0004548 | hsa-miR-129*   |
| 46921  | hsa-miR-1290   | 1 | MIMAT0005880 | hsa-miR-1290   |
| 46281  | hsa-miR-1291   | 1 | MIMAT0005881 | hsa-miR-1291   |
| 45936  | hsa-miR-1292   | 1 | MIMAT0005943 | hsa-miR-1292   |
| 46416  | hsa-miR-1293   | 1 | MIMAT0005883 | hsa-miR-1293   |
| 46661  | hsa-miR-1294   | 1 | MIMAT0005884 | hsa-miR-1294   |
| 46741  | hsa-miR-1295   | 1 | MIMAT0005885 | hsa-miR-1295   |
| 42710  | hsa-miR-1296   | 1 | MIMAT0005794 | hsa-miR-1296   |
| 46944  | hsa-miR-1297   | 1 | MIMAT0005886 | hsa-miR-1297   |
| 46381  | hsa-miR-1298   | 1 | MIMAT0005800 | hsa-miR-1298   |
| 46788  | hsa-miR-1299   | 1 | MIMAT0005887 | hsa-miR-1299   |
| 46215  | hsa-miR-1301   | 1 | MIMAT0005797 | hsa-miR-1301   |
| 46796  | hsa-miR-1302   | 1 | MIMAT0005890 | hsa-miR-1302   |
| 46625  | hsa-miR-1303   | 1 | MIMAT0005891 | hsa-miR-1303   |
| 46479  | hsa-miR-1304   | 1 | MIMAT0005892 | hsa-miR-1304   |
| 46501  | hsa-miR-1305   | 1 | MIMAT0005893 | hsa-miR-1305   |
| 46223  | hsa-miR-1306   | 1 | MIMAT0005950 | hsa-miR-1306   |
| 42681  | hsa-miR-1307   | 1 | MIMAT0005951 | hsa-miR-1307   |
| 10138  | hsa-miR-130a   | 1 | MIMAT0000425 | hsa-miR-130a   |
| 42718  | hsa-miR-130a*  | 1 | MIMAT0004593 | hsa-miR-130a*  |

|        |                 |   |              |                 |
|--------|-----------------|---|--------------|-----------------|
| 10936  | hsa-miR-130b    | 1 | MIMAT0000691 | hsa-miR-130b    |
| 42787  | hsa-miR-130b*   | 1 | MIMAT0004680 | hsa-miR-130b*   |
| 10937  | hsa-miR-132     | 1 | MIMAT0000426 | hsa-miR-132     |
| 145634 | hsa-miR-132*    | 1 | MIMAT0004594 | hsa-miR-132*    |
| 46866  | hsa-miR-1321    | 1 | MIMAT0005952 | hsa-miR-1321    |
| 46408  | hsa-miR-1322    | 1 | MIMAT0005953 | hsa-miR-1322    |
| 46614  | hsa-miR-1323    | 1 | MIMAT0005795 | hsa-miR-1323    |
| 46647  | hsa-miR-1324    | 1 | MIMAT0005956 | hsa-miR-1324    |
| 32809  | blank           | 1 | MIMAT0000427 | hsa-miR-133a    |
| 146137 | hsa-miR-133a    | 1 | MIMAT0000427 | hsa-miR-133a    |
| 146160 | hsa-miR-133b    | 1 | MIMAT0000770 | hsa-miR-133b    |
| 42942  | hsa-miR-134     | 1 | MIMAT0000447 | hsa-miR-134     |
| 145679 | blank           | 1 | MIMAT0000428 | hsa-miR-135a    |
| 42839  | hsa-miR-135a    | 1 | MIMAT0000428 | hsa-miR-135a    |
| 42609  | hsa-miR-135a*   | 1 | MIMAT0004595 | hsa-miR-135a*   |
| 10942  | blank           | 1 | MIMAT0000758 | hsa-miR-135b    |
| 145914 | hsa-miR-135b    | 1 | MIMAT0000758 | hsa-miR-135b    |
| 42615  | hsa-miR-135b*   | 1 | MIMAT0004698 | hsa-miR-135b*   |
| 145760 | hsa-miR-136     | 1 | MIMAT0000448 | hsa-miR-136     |
| 10943  | blank           | 1 | MIMAT0000448 | hsa-miR-136     |
| 42512  | hsa-miR-136*    | 1 | MIMAT0004606 | hsa-miR-136*    |
| 42686  | blank           | 1 | MIMAT0004606 | hsa-miR-136*    |
| 10944  | blank           | 1 | MIMAT0000429 | hsa-miR-137     |
| 145749 | hsa-miR-137     | 1 | MIMAT0000429 | hsa-miR-137     |
| 13140  | hsa-miR-138     | 1 | MIMAT0000430 | hsa-miR-138     |
| 42872  | hsa-miR-138-1*  | 1 | MIMAT0004607 | hsa-miR-138-1*  |
| 42454  | hsa-miR-138-2*  | 1 | MIMAT0004596 | hsa-miR-138-2*  |
| 42451  | hsa-miR-139-3p  | 1 | MIMAT0004552 | hsa-miR-139-3p  |
| 145677 | hsa-miR-139-5p  | 1 | MIMAT0000250 | hsa-miR-139-5p  |
| 42630  | hsa-miR-140-3p  | 1 | MIMAT0004597 | hsa-miR-140-3p  |
| 4700   | hsa-miR-140-5p  | 1 | MIMAT0000431 | hsa-miR-140-5p  |
| 10946  | hsa-miR-141     | 1 | MIMAT0000432 | hsa-miR-141     |
| 145972 | hsa-miR-141*    | 1 | MIMAT0004598 | hsa-miR-141*    |
| 10947  | hsa-miR-142-3p  | 1 | MIMAT0000434 | hsa-miR-142-3p  |
| 145798 | hsa-miR-142-5p  | 1 | MIMAT0000433 | hsa-miR-142-5p  |
| 13177  | hsa-miR-143     | 1 | MIMAT0000435 | hsa-miR-143     |
| 46467  | hsa-miR-143*    | 1 | MIMAT0004599 | hsa-miR-143*    |
| 29802  | hsa-miR-144     | 1 | MIMAT0000436 | hsa-miR-144     |
| 42660  | hsa-miR-144*    | 1 | MIMAT0004600 | hsa-miR-144*    |
| 42641  | hsa-miR-145     | 1 | MIMAT0000437 | hsa-miR-145     |
| 31867  | hsa-miR-145*    | 1 | MIMAT0004601 | hsa-miR-145*    |
| 46584  | hsa-miR-1468    | 1 | MIMAT0006789 | hsa-miR-1468    |
| 146072 | hsa-miR-1469    | 1 | MIMAT0007347 | hsa-miR-1469    |
| 10952  | hsa-miR-146a    | 1 | MIMAT0000449 | hsa-miR-146a    |
| 145755 | hsa-miR-146a*   | 1 | MIMAT0004608 | hsa-miR-146a*   |
| 42461  | hsa-miR-146b-3p | 1 | MIMAT0004766 | hsa-miR-146b-3p |
| 10306  | hsa-miR-146b-5p | 1 | MIMAT0002809 | hsa-miR-146b-5p |
| 10954  | hsa-miR-147     | 1 | MIMAT0000251 | hsa-miR-147     |
| 146121 | hsa-miR-1470    | 1 | MIMAT0007348 | hsa-miR-1470    |
| 146052 | hsa-miR-1471    | 1 | MIMAT0007349 | hsa-miR-1471    |
| 17411  | hsa-miR-147b    | 1 | MIMAT0004928 | hsa-miR-147b    |
| 10955  | hsa-miR-148a    | 1 | MIMAT0000243 | hsa-miR-148a    |
| 17872  | hsa-miR-148a*   | 1 | MIMAT0004549 | hsa-miR-148a*   |



|        |                 |   |              |                 |
|--------|-----------------|---|--------------|-----------------|
| 19585  | hsa-miR-148b    | 1 | MIMAT0000759 | hsa-miR-148b    |
| 42736  | hsa-miR-148b*   | 1 | MIMAT0004699 | hsa-miR-148b*   |
| 42810  | hsa-miR-149     | 1 | MIMAT0000450 | hsa-miR-149     |
| 42486  | hsa-miR-149*    | 1 | MIMAT0004609 | hsa-miR-149*    |
| 42802  | blank           | 1 | MIMAT0000451 | hsa-miR-150     |
| 145678 | hsa-miR-150     | 1 | MIMAT0000451 | hsa-miR-150     |
| 42850  | hsa-miR-150*    | 1 | MIMAT0004610 | hsa-miR-150*    |
| 17463  | hsa-miR-151-3p  | 1 | MIMAT0000757 | hsa-miR-151-3p  |
| 11260  | hsa-miR-151-5p  | 1 | MIMAT0004697 | hsa-miR-151-5p  |
| 17676  | hsa-miR-152     | 1 | MIMAT0000438 | hsa-miR-152     |
| 42599  | hsa-miR-153     | 1 | MIMAT0000439 | hsa-miR-153     |
| 46515  | hsa-miR-1537    | 1 | MIMAT0007399 | hsa-miR-1537    |
| 146114 | hsa-miR-1538    | 1 | MIMAT0007400 | hsa-miR-1538    |
| 146105 | hsa-miR-1539    | 1 | MIMAT0007401 | hsa-miR-1539    |
| 46616  | blank           | 1 | MIMAT0000452 | hsa-miR-154     |
| 145857 | hsa-miR-154     | 1 | MIMAT0000452 | hsa-miR-154     |
| 42572  | hsa-miR-154*    | 1 | MIMAT0000453 | hsa-miR-154*    |
| 10964  | hsa-miR-155     | 1 | MIMAT0000646 | hsa-miR-155     |
| 42949  | hsa-miR-155*    | 1 | MIMAT0004658 | hsa-miR-155*    |
| 27720  | hsa-miR-15a     | 1 | MIMAT0000068 | hsa-miR-15a     |
| 42789  | hsa-miR-15a*    | 1 | MIMAT0004488 | hsa-miR-15a*    |
| 17280  | hsa-miR-15b     | 1 | MIMAT0000417 | hsa-miR-15b     |
| 17902  | hsa-miR-15b*    | 1 | MIMAT0004586 | hsa-miR-15b*    |
| 10967  | hsa-miR-16      | 1 | MIMAT0000069 | hsa-miR-16      |
| 17936  | hsa-miR-16-1*   | 1 | MIMAT0004489 | hsa-miR-16-1*   |
| 42874  | hsa-miR-16-2*   | 1 | MIMAT0004518 | hsa-miR-16-2*   |
| 42650  | hsa-miR-17      | 1 | MIMAT0000070 | hsa-miR-17      |
| 46777  | blank           | 1 | MIMAT0000070 | hsa-miR-17      |
| 19588  | hsa-miR-17*     | 1 | MIMAT0000071 | hsa-miR-17*     |
| 42865  | hsa-miR-181a    | 1 | MIMAT0000256 | hsa-miR-181a    |
| 17928  | hsa-miR-181a-2* | 1 | MIMAT0004558 | hsa-miR-181a-2* |
| 11013  | hsa-miR-181a*   | 1 | MIMAT0000270 | hsa-miR-181a*   |
| 10972  | hsa-miR-181b    | 1 | MIMAT0000257 | hsa-miR-181b    |
| 42496  | hsa-miR-181c    | 1 | MIMAT0000258 | hsa-miR-181c    |
| 145759 | hsa-miR-181c*   | 1 | MIMAT0004559 | hsa-miR-181c*   |
| 145636 | hsa-miR-181d    | 1 | MIMAT0002821 | hsa-miR-181d    |
| 10975  | hsa-miR-182     | 1 | MIMAT0000259 | hsa-miR-182     |
| 10976  | hsa-miR-182*    | 1 | MIMAT0000260 | hsa-miR-182*    |
| 46266  | hsa-miR-1825    | 1 | MIMAT0006765 | hsa-miR-1825    |
| 46810  | hsa-miR-1827    | 1 | MIMAT0006767 | hsa-miR-1827    |
| 10977  | hsa-miR-183     | 1 | MIMAT0000261 | hsa-miR-183     |
| 17953  | hsa-miR-183*    | 1 | MIMAT0004560 | hsa-miR-183*    |
| 145801 | hsa-miR-184     | 1 | MIMAT0000454 | hsa-miR-184     |
| 42902  | hsa-miR-185     | 1 | MIMAT0000455 | hsa-miR-185     |
| 17904  | hsa-miR-185*    | 1 | MIMAT0004611 | hsa-miR-185*    |
| 18739  | hsa-miR-186     | 1 | MIMAT0000456 | hsa-miR-186     |
| 42614  | hsa-miR-186*    | 1 | MIMAT0004612 | hsa-miR-186*    |
| 145637 | hsa-miR-187     | 1 | MIMAT0000262 | hsa-miR-187     |
| 42775  | hsa-miR-187*    | 1 | MIMAT0004561 | hsa-miR-187*    |
| 42786  | hsa-miR-188-3p  | 1 | MIMAT0004613 | hsa-miR-188-3p  |
| 42620  | hsa-miR-188-5p  | 1 | MIMAT0000457 | hsa-miR-188-5p  |
| 42588  | hsa-miR-18a     | 1 | MIMAT0000072 | hsa-miR-18a     |
| 13178  | hsa-miR-18a*    | 1 | MIMAT0002891 | hsa-miR-18a*    |

|        |                      |   |              |                 |
|--------|----------------------|---|--------------|-----------------|
| 13141  | blank                | 1 | MIMAT0001412 | hsa-miR-18b     |
| 42644  | blank                | 1 | MIMAT0001412 | hsa-miR-18b     |
| 145878 | hsa-miR-18b          | 1 | MIMAT0001412 | hsa-miR-18b     |
| 145826 | hsa-miR-18b*         | 1 | MIMAT0004751 | hsa-miR-18b*    |
| 27536  | hsa-miR-190          | 1 | MIMAT0000458 | hsa-miR-190     |
| 28431  | hsa-miR-1908         | 1 | MIMAT0007881 | hsa-miR-1908    |
| 146180 | hsa-miR-1909         | 1 | MIMAT0007883 | hsa-miR-1909    |
| 146138 | hsa-miR-1909*        | 1 | MIMAT0007882 | hsa-miR-1909*   |
| 32731  | hsa-miR-190b         | 1 | MIMAT0004929 | hsa-miR-190b    |
| 10985  | hsa-miR-191          | 1 | MIMAT0000440 | hsa-miR-191     |
| 42705  | hsa-miR-191*         | 1 | MIMAT0001618 | hsa-miR-191*    |
| 146109 | hsa-miR-1910         | 1 | MIMAT0007884 | hsa-miR-1910    |
| 146000 | hsa-miR-1911         | 1 | MIMAT0007885 | hsa-miR-1911    |
| 146094 | hsa-miR-1911*        | 1 | MIMAT0007886 | hsa-miR-1911*   |
| 146168 | hsa-miR-1912         | 1 | MIMAT0007887 | hsa-miR-1912    |
| 146103 | hsa-miR-1913         | 1 | MIMAT0007888 | hsa-miR-1913    |
| 146091 | hsa-miR-1914         | 1 | MIMAT0007889 | hsa-miR-1914    |
| 146061 | hsa-miR-1914*        | 1 | MIMAT0007890 | hsa-miR-1914*   |
| 146068 | hsa-miR-1915         | 1 | MIMAT0007892 | hsa-miR-1915    |
| 146069 | hsa-miR-1915*        | 1 | MIMAT0007891 | hsa-miR-1915*   |
| 17732  | hsa-miR-192          | 1 | MIMAT0000222 | hsa-miR-192     |
| 17946  | hsa-miR-192*         | 1 | MIMAT0004543 | hsa-miR-192*    |
| 10986  | hsa-miR-193a-3p      | 1 | MIMAT0000459 | hsa-miR-193a-3p |
| 46443  | hsa-miR-193a-5p      | 1 | MIMAT0004614 | hsa-miR-193a-5p |
| 145895 | blank                | 1 | MIMAT0002819 | hsa-miR-193b    |
| 10987  | hsa-miR-193b         | 1 | MIMAT0002819 | hsa-miR-193b    |
| 42962  | hsa-miR-193b*        | 1 | MIMAT0004767 | hsa-miR-193b*   |
| 10988  | hsa-miR-194          | 1 | MIMAT0000460 | hsa-miR-194     |
| 42570  | hsa-miR-194*         | 1 | MIMAT0004671 | hsa-miR-194*    |
| 13148  | hsa-miR-195          | 1 | MIMAT0000461 | hsa-miR-195     |
| 42723  | hsa-miR-195*         | 1 | MIMAT0004615 | hsa-miR-195*    |
| 10990  | hsa-miR-196a         | 1 | MIMAT0000226 | hsa-miR-196a    |
| 42538  | hsa-miR-196a*        | 1 | MIMAT0004562 | hsa-miR-196a*   |
| 10991  | blank                | 1 | MIMAT0001080 | hsa-miR-196b    |
| 145889 | hsa-miR-196b         | 1 | MIMAT0001080 | hsa-miR-196b    |
| 145995 | hsa-miR-196b*        | 1 | MIMAT0009201 | hsa-miR-196b*   |
| 42783  | hsa-miR-197          | 1 | MIMAT0000227 | hsa-miR-197     |
| 146142 | hsa-miR-1972         | 1 | MIMAT0009447 | hsa-miR-1972    |
| 146165 | hsa-miR-1973         | 1 | MIMAT0009448 | hsa-miR-1973    |
| 146140 | hsa-miR-1976         | 1 | MIMAT0009451 | hsa-miR-1976    |
| 27540  | hsa-miR-198          | 1 | MIMAT0000228 | hsa-miR-198     |
| 10995  | hsa-miR-199a-3p/hsa- | 2 | MIMAT0000232 | hsa-miR-199a-3p |
| 29562  | hsa-miR-199a-5p      | 1 | MIMAT0000231 | hsa-miR-199a-5p |
| 10995  | hsa-miR-199a-3p/hsa- | 2 | MIMAT0004563 | hsa-miR-199b-3p |
| 19591  | hsa-miR-199b-5p      | 1 | MIMAT0000263 | hsa-miR-199b-5p |
| 10997  | hsa-miR-19a          | 1 | MIMAT0000073 | hsa-miR-19a     |
| 42549  | hsa-miR-19a*         | 1 | MIMAT0004490 | hsa-miR-19a*    |
| 10998  | hsa-miR-19b          | 1 | MIMAT0000074 | hsa-miR-19b     |
| 17883  | hsa-miR-19b-1*       | 1 | MIMAT0004491 | hsa-miR-19b-1*  |
| 42918  | hsa-miR-19b-2*       | 1 | MIMAT0004492 | hsa-miR-19b-2*  |
| 11000  | hsa-miR-200a         | 1 | MIMAT0000682 | hsa-miR-200a    |
| 145827 | hsa-miR-200a*        | 1 | MIMAT0001620 | hsa-miR-200a*   |
| 145953 | hsa-miR-200b         | 1 | MIMAT0000318 | hsa-miR-200b    |

|        |                  |   |              |                  |
|--------|------------------|---|--------------|------------------|
| 145974 | hsa-miR-200b*    | 1 | MIMAT0004571 | hsa-miR-200b*    |
| 17427  | hsa-miR-200c     | 1 | MIMAT0000617 | hsa-miR-200c     |
| 17851  | hsa-miR-200c*    | 1 | MIMAT0004657 | hsa-miR-200c*    |
| 42968  | hsa-miR-202      | 1 | MIMAT0002811 | hsa-miR-202      |
| 42590  | hsa-miR-202*     | 1 | MIMAT0002810 | hsa-miR-202*     |
| 42507  | blank            | 1 | MIMAT0002810 | hsa-miR-202*     |
| 11004  | hsa-miR-203      | 1 | MIMAT0000264 | hsa-miR-203      |
| 11005  | hsa-miR-204      | 1 | MIMAT0000265 | hsa-miR-204      |
| 46917  | hsa-miR-205      | 1 | MIMAT0000266 | hsa-miR-205      |
| 145996 | hsa-miR-205*     | 1 | MIMAT0009197 | hsa-miR-205*     |
| 145986 | hsa-miR-2052     | 1 | MIMAT0009977 | hsa-miR-2052     |
| 146122 | hsa-miR-2053     | 1 | MIMAT0009978 | hsa-miR-2053     |
| 145987 | hsa-miR-2054     | 1 | MIMAT0009979 | hsa-miR-2054     |
| 11007  | hsa-miR-206      | 1 | MIMAT0000462 | hsa-miR-206      |
| 5730   | hsa-miR-208a     | 1 | MIMAT0000241 | hsa-miR-208a     |
| 42555  | hsa-miR-208b     | 1 | MIMAT0004960 | hsa-miR-208b     |
| 145845 | hsa-miR-20a      | 1 | MIMAT0000075 | hsa-miR-20a      |
| 42663  | hsa-miR-20a*     | 1 | MIMAT0004493 | hsa-miR-20a*     |
| 42640  | blank            | 1 | MIMAT0001413 | hsa-miR-20b      |
| 42860  | blank            | 1 | MIMAT0001413 | hsa-miR-20b      |
| 145915 | hsa-miR-20b      | 1 | MIMAT0001413 | hsa-miR-20b      |
| 17882  | hsa-miR-20b*     | 1 | MIMAT0004752 | hsa-miR-20b*     |
| 5740   | hsa-miR-21       | 1 | MIMAT0000076 | hsa-miR-21       |
| 145917 | blank            | 1 | MIMAT0000076 | hsa-miR-21       |
| 42524  | hsa-miR-21*      | 1 | MIMAT0004494 | hsa-miR-21*      |
| 145852 | hsa-miR-210      | 1 | MIMAT0000267 | hsa-miR-210      |
| 11011  | hsa-miR-211      | 1 | MIMAT0000268 | hsa-miR-211      |
| 42734  | hsa-miR-2110     | 1 | MIMAT0010133 | hsa-miR-2110     |
| 146179 | hsa-miR-2113     | 1 | MIMAT0009206 | hsa-miR-2113     |
| 146074 | hsa-miR-2114     | 1 | MIMAT0011156 | hsa-miR-2114     |
| 146173 | hsa-miR-2114*    | 1 | MIMAT0011157 | hsa-miR-2114*    |
| 146044 | hsa-miR-2115     | 1 | MIMAT0011158 | hsa-miR-2115     |
| 146161 | hsa-miR-2115*    | 1 | MIMAT0011159 | hsa-miR-2115*    |
| 146010 | hsa-miR-2116     | 1 | MIMAT0011160 | hsa-miR-2116     |
| 146116 | hsa-miR-2116*    | 1 | MIMAT0011161 | hsa-miR-2116*    |
| 146131 | hsa-miR-2117     | 1 | MIMAT0011162 | hsa-miR-2117     |
| 42627  | hsa-miR-212      | 1 | MIMAT0000269 | hsa-miR-212      |
| 11014  | hsa-miR-214      | 1 | MIMAT0000271 | hsa-miR-214      |
| 145822 | hsa-miR-214*     | 1 | MIMAT0004564 | hsa-miR-214*     |
| 11015  | hsa-miR-215      | 1 | MIMAT0000272 | hsa-miR-215      |
| 42553  | hsa-miR-216a     | 1 | MIMAT0000273 | hsa-miR-216a     |
| 145707 | hsa-miR-216b     | 1 | MIMAT0004959 | hsa-miR-216b     |
| 19016  | hsa-miR-217      | 1 | MIMAT0000274 | hsa-miR-217      |
| 11018  | hsa-miR-218      | 1 | MIMAT0000275 | hsa-miR-218      |
| 42941  | hsa-miR-218-1*   | 1 | MIMAT0004565 | hsa-miR-218-1*   |
| 145836 | hsa-miR-218-2*   | 1 | MIMAT0004566 | hsa-miR-218-2*   |
| 21702  | hsa-miR-219-1-3p | 1 | MIMAT0004567 | hsa-miR-219-1-3p |
| 42834  | hsa-miR-219-2-3p | 1 | MIMAT0004675 | hsa-miR-219-2-3p |
| 42509  | hsa-miR-219-5p   | 1 | MIMAT0000276 | hsa-miR-219-5p   |
| 11020  | hsa-miR-22       | 1 | MIMAT0000077 | hsa-miR-22       |
| 42532  | hsa-miR-22*      | 1 | MIMAT0004495 | hsa-miR-22*      |
| 11022  | hsa-miR-221      | 1 | MIMAT0000278 | hsa-miR-221      |
| 42475  | hsa-miR-221*     | 1 | MIMAT0004568 | hsa-miR-221*     |

|        |                   |   |              |                 |
|--------|-------------------|---|--------------|-----------------|
| 11023  | hsa-miR-222       | 1 | MIMAT0000279 | hsa-miR-222     |
| 17918  | hsa-miR-222*      | 1 | MIMAT0004569 | hsa-miR-222*    |
| 11024  | hsa-miR-223       | 1 | MIMAT0000280 | hsa-miR-223     |
| 42460  | hsa-miR-223*      | 1 | MIMAT0004570 | hsa-miR-223*    |
| 42566  | hsa-miR-224       | 1 | MIMAT0000281 | hsa-miR-224     |
| 146163 | hsa-miR-224*      | 1 | MIMAT0009198 | hsa-miR-224*    |
| 46875  | hsa-miR-2276      | 1 | MIMAT0011775 | hsa-miR-2276    |
| 146025 | hsa-miR-2277      | 1 | MIMAT0011777 | hsa-miR-2277-3p |
| 46751  | hsa-miR-2278      | 1 | MIMAT0011778 | hsa-miR-2278    |
| 46827  | hsa-miRPlus-F1197 | 1 | MIMAT0017950 | hsa-miR-2355-3p |
| 42744  | hsa-miR-23a       | 1 | MIMAT0000078 | hsa-miR-23a     |
| 42638  | hsa-miR-23a*      | 1 | MIMAT0004496 | hsa-miR-23a*    |
| 145841 | hsa-miR-23b       | 1 | MIMAT0000418 | hsa-miR-23b     |
| 145751 | hsa-miR-23b*      | 1 | MIMAT0004587 | hsa-miR-23b*    |
| 17506  | hsa-miR-24        | 1 | MIMAT0000080 | hsa-miR-24      |
| 146043 | hsa-miR-24-1*     | 1 | MIMAT0000079 | hsa-miR-24-1*   |
| 42950  | hsa-miR-24-2*     | 1 | MIMAT0004497 | hsa-miR-24-2*   |
| 42682  | hsa-miR-25        | 1 | MIMAT0000081 | hsa-miR-25      |
| 42929  | hsa-miR-25*       | 1 | MIMAT0004498 | hsa-miR-25*     |
| 11030  | hsa-miR-26a       | 1 | MIMAT0000082 | hsa-miR-26a     |
| 42628  | hsa-miR-26a-1*    | 1 | MIMAT0004499 | hsa-miR-26a-1*  |
| 42666  | hsa-miR-26a-2*    | 1 | MIMAT0004681 | hsa-miR-26a-2*  |
| 146008 | hsa-miR-26b       | 1 | MIMAT0000083 | hsa-miR-26b     |
| 42523  | hsa-miR-26b*      | 1 | MIMAT0004500 | hsa-miR-26b*    |
| 46483  | hsa-miR-27a       | 1 | MIMAT0000084 | hsa-miR-27a     |
| 17818  | hsa-miR-27a*      | 1 | MIMAT0004501 | hsa-miR-27a*    |
| 145944 | hsa-miR-27b       | 1 | MIMAT0000419 | hsa-miR-27b     |
| 42823  | hsa-miR-27b*      | 1 | MIMAT0004588 | hsa-miR-27b*    |
| 145714 | hsa-miR-28-3p     | 1 | MIMAT0004502 | hsa-miR-28-3p   |
| 42831  | blank             | 1 | MIMAT0000085 | hsa-miR-28-5p   |
| 146049 | hsa-miR-28-5p     | 1 | MIMAT0000085 | hsa-miR-28-5p   |
| 42528  | hsa-miR-296-3p    | 1 | MIMAT0004679 | hsa-miR-296-3p  |
| 146100 | hsa-miR-296-5p    | 1 | MIMAT0000690 | hsa-miR-296-5p  |
| 6880   | hsa-miR-297       | 1 | MIMAT0004450 | hsa-miR-297     |
| 46264  | hsa-miR-298       | 1 | MIMAT0004901 | hsa-miR-298     |
| 11037  | hsa-miR-299-3p    | 1 | MIMAT0000687 | hsa-miR-299-3p  |
| 11038  | hsa-miR-299-5p    | 1 | MIMAT0002890 | hsa-miR-299-5p  |
| 11039  | hsa-miR-29a       | 1 | MIMAT0000086 | hsa-miR-29a     |
| 145638 | hsa-miR-29a*      | 1 | MIMAT0004503 | hsa-miR-29a*    |
| 11040  | hsa-miR-29b       | 1 | MIMAT0000100 | hsa-miR-29b     |
| 17810  | hsa-miR-29b-1*    | 1 | MIMAT0004514 | hsa-miR-29b-1*  |
| 42792  | hsa-miR-29b-2*    | 1 | MIMAT0004515 | hsa-miR-29b-2*  |
| 11041  | hsa-miR-29c       | 1 | MIMAT0000681 | hsa-miR-29c     |
| 14300  | hsa-miR-29c*      | 1 | MIMAT0004673 | hsa-miR-29c*    |
| 42513  | hsa-miR-300       | 1 | MIMAT0004903 | hsa-miR-300     |
| 13143  | hsa-miR-301a      | 1 | MIMAT0000688 | hsa-miR-301a    |
| 17886  | hsa-miR-301b      | 1 | MIMAT0004958 | hsa-miR-301b    |
| 145639 | hsa-miR-302a      | 1 | MIMAT0000684 | hsa-miR-302a    |
| 42541  | hsa-miR-302a*     | 1 | MIMAT0000683 | hsa-miR-302a*   |
| 11043  | hsa-miR-302b      | 1 | MIMAT0000715 | hsa-miR-302b    |
| 42667  | hsa-miR-302b*     | 1 | MIMAT0000714 | hsa-miR-302b*   |
| 11044  | hsa-miR-302c      | 1 | MIMAT0000717 | hsa-miR-302c    |
| 11045  | hsa-miR-302c*     | 1 | MIMAT0000716 | hsa-miR-302c*   |

|        |                   |   |              |                 |
|--------|-------------------|---|--------------|-----------------|
| 27838  | hsa-miR-302d      | 1 | MIMAT0000718 | hsa-miR-302d    |
| 46729  | hsa-miR-302d*     | 1 | MIMAT0004685 | hsa-miR-302d*   |
| 45764  | hsa-miR-302e      | 1 | MIMAT0005931 | hsa-miR-302e    |
| 45745  | hsa-miR-302f      | 1 | MIMAT0005932 | hsa-miR-302f    |
| 146086 | hsa-miR-30a       | 1 | MIMAT0000087 | hsa-miR-30a     |
| 19595  | hsa-miR-30a*      | 1 | MIMAT0000088 | hsa-miR-30a*    |
| 146112 | hsa-miR-30b       | 1 | MIMAT0000420 | hsa-miR-30b     |
| 46356  | hsa-miR-30b*      | 1 | MIMAT0004589 | hsa-miR-30b*    |
| 42923  | hsa-miR-30c       | 1 | MIMAT0000244 | hsa-miR-30c     |
| 42702  | hsa-miR-30c-1*    | 1 | MIMAT0004674 | hsa-miR-30c-1*  |
| 46626  | hsa-miR-30c-2*    | 1 | MIMAT0004550 | hsa-miR-30c-2*  |
| 19596  | hsa-miR-30d       | 1 | MIMAT0000245 | hsa-miR-30d     |
| 17853  | hsa-miR-30d*      | 1 | MIMAT0004551 | hsa-miR-30d*    |
| 28191  | hsa-miR-30e       | 1 | MIMAT0000692 | hsa-miR-30e     |
| 145676 | hsa-miR-30e*      | 1 | MIMAT0000693 | hsa-miR-30e*    |
| 11052  | hsa-miR-31        | 1 | MIMAT0000089 | hsa-miR-31      |
| 46320  | hsa-miR-31*       | 1 | MIMAT0004504 | hsa-miR-31*     |
| 146066 | hsa-miR-3116      | 1 | MIMAT0014978 | hsa-miR-3116    |
| 146005 | hsa-miR-3129      | 1 | MIMAT0014992 | hsa-miR-3129-5p |
| 46863  | hsa-miRPlus-F1246 | 1 | MIMAT0019210 | hsa-miR-3157-3p |
| 46710  | hsa-miR-3157      | 1 | MIMAT0015031 | hsa-miR-3157-5p |
| 146110 | hsa-miR-3164      | 1 | MIMAT0015038 | hsa-miR-3164    |
| 146085 | hsa-miR-3170      | 1 | MIMAT0015045 | hsa-miR-3170    |
| 46567  | hsa-miR-3176      | 1 | MIMAT0015053 | hsa-miR-3176    |
| 146152 | hsa-miR-3179      | 1 | MIMAT0015056 | hsa-miR-3179    |
| 46274  | hsa-miR-3187      | 1 | MIMAT0015069 | hsa-miR-3187-3p |
| 11053  | hsa-miR-32        | 1 | MIMAT0000090 | hsa-miR-32      |
| 29575  | hsa-miR-32*       | 1 | MIMAT0004505 | hsa-miR-32*     |
| 146158 | hsa-miR-3202      | 1 | MIMAT0015089 | hsa-miR-3202    |
| 27533  | hsa-miR-320a      | 1 | MIMAT0000510 | hsa-miR-320a    |
| 46324  | hsa-miR-320b      | 1 | MIMAT0005792 | hsa-miR-320b    |
| 46228  | hsa-miR-320c      | 1 | MIMAT0005793 | hsa-miR-320c    |
| 46870  | hsa-miR-320d      | 1 | MIMAT0006764 | hsa-miR-320d    |
| 42957  | hsa-miR-323-3p    | 1 | MIMAT0000755 | hsa-miR-323-3p  |
| 42457  | hsa-miR-323-5p    | 1 | MIMAT0004696 | hsa-miR-323-5p  |
| 42672  | hsa-miR-323b-5p   | 1 | MIMAT0001630 | hsa-miR-323b-5p |
| 145708 | hsa-miR-324-3p    | 1 | MIMAT0000762 | hsa-miR-324-3p  |
| 42719  | blank             | 1 | MIMAT0000762 | hsa-miR-324-3p  |
| 42477  | hsa-miR-324-5p    | 1 | MIMAT0000761 | hsa-miR-324-5p  |
| 11058  | hsa-miR-325       | 1 | MIMAT0000771 | hsa-miR-325     |
| 42693  | hsa-miR-326       | 1 | MIMAT0000756 | hsa-miR-326     |
| 145640 | hsa-miR-328       | 1 | MIMAT0000752 | hsa-miR-328     |
| 11061  | hsa-miR-329       | 1 | MIMAT0001629 | hsa-miR-329     |
| 11063  | hsa-miR-330-3p    | 1 | MIMAT0000751 | hsa-miR-330-3p  |
| 145843 | hsa-miR-330-5p    | 1 | MIMAT0004693 | hsa-miR-330-5p  |
| 42887  | hsa-miR-331-3p    | 1 | MIMAT0000760 | hsa-miR-331-3p  |
| 17866  | hsa-miR-331-5p    | 1 | MIMAT0004700 | hsa-miR-331-5p  |
| 11065  | hsa-miR-335       | 1 | MIMAT0000765 | hsa-miR-335     |
| 145745 | hsa-miR-335*      | 1 | MIMAT0004703 | hsa-miR-335*    |
| 42673  | hsa-miR-337-3p    | 1 | MIMAT0000754 | hsa-miR-337-3p  |
| 17944  | hsa-miR-337-5p    | 1 | MIMAT0004695 | hsa-miR-337-5p  |
| 42592  | hsa-miR-338-3p    | 1 | MIMAT0000763 | hsa-miR-338-3p  |
| 17825  | hsa-miR-338-5p    | 1 | MIMAT0004701 | hsa-miR-338-5p  |

|        |                      |   |              |                |
|--------|----------------------|---|--------------|----------------|
| 42912  | hsa-miR-339-3p       | 1 | MIMAT0004702 | hsa-miR-339-3p |
| 42739  | hsa-miR-339-5p       | 1 | MIMAT0000764 | hsa-miR-339-5p |
| 145859 | hsa-miR-33a          | 1 | MIMAT0000091 | hsa-miR-33a    |
| 145757 | hsa-miR-33a*         | 1 | MIMAT0004506 | hsa-miR-33a*   |
| 145950 | hsa-miR-33b          | 1 | MIMAT0003301 | hsa-miR-33b    |
| 145734 | hsa-miR-33b*         | 1 | MIMAT0004811 | hsa-miR-33b*   |
| 29872  | hsa-miR-340          | 1 | MIMAT0004692 | hsa-miR-340    |
| 42738  | hsa-miR-340*         | 1 | MIMAT0000750 | hsa-miR-340*   |
| 32884  | hsa-miR-342-3p       | 1 | MIMAT0000753 | hsa-miR-342-3p |
| 42576  | hsa-miR-342-5p       | 1 | MIMAT0004694 | hsa-miR-342-5p |
| 42934  | hsa-miR-345          | 1 | MIMAT0000772 | hsa-miR-345    |
| 145732 | hsa-miR-346          | 1 | MIMAT0000773 | hsa-miR-346    |
| 27217  | hsa-miR-34a          | 1 | MIMAT0000255 | hsa-miR-34a    |
| 46299  | hsa-miR-34a*         | 1 | MIMAT0004557 | hsa-miR-34a*   |
| 42724  | hsa-miR-34b          | 1 | MIMAT0004676 | hsa-miR-34b    |
| 11073  | hsa-miR-34b*         | 1 | MIMAT0000685 | hsa-miR-34b*   |
| 42729  | hsa-miR-34c-3p       | 1 | MIMAT0004677 | hsa-miR-34c-3p |
| 11074  | hsa-miR-34c-5p       | 1 | MIMAT0000686 | hsa-miR-34c-5p |
| 145865 | hsa-miR-361-3p       | 1 | MIMAT0004682 | hsa-miR-361-3p |
| 14301  | hsa-miR-361-5p       | 1 | MIMAT0000703 | hsa-miR-361-5p |
| 17893  | hsa-miR-362-3p       | 1 | MIMAT0004683 | hsa-miR-362-3p |
| 42503  | hsa-miR-362-5p       | 1 | MIMAT0000705 | hsa-miR-362-5p |
| 14279  | blank                | 1 | MIMAT0000705 | hsa-miR-362-5p |
| 11077  | hsa-miR-363          | 1 | MIMAT0000707 | hsa-miR-363    |
| 27544  | hsa-miR-363*         | 1 | MIMAT0003385 | hsa-miR-363*   |
| 11078  | hsa-miR-365          | 1 | MIMAT0000710 | hsa-miR-365    |
| 146029 | hsa-miR-365*         | 1 | MIMAT0009199 | hsa-miR-365*   |
| 14280  | hsa-miR-367          | 1 | MIMAT0000719 | hsa-miR-367    |
| 145697 | hsa-miR-367*         | 1 | MIMAT0004686 | hsa-miR-367*   |
| 29529  | hsa-miR-369-3p       | 1 | MIMAT0000721 | hsa-miR-369-3p |
| 145641 | hsa-miR-369-5p       | 1 | MIMAT0001621 | hsa-miR-369-5p |
| 42967  | hsa-miR-370          | 1 | MIMAT0000722 | hsa-miR-370    |
| 11083  | hsa-miR-371-3p       | 1 | MIMAT0000723 | hsa-miR-371-3p |
| 145769 | hsa-miR-371-5p       | 1 | MIMAT0004687 | hsa-miR-371-5p |
| 11084  | hsa-miR-372          | 1 | MIMAT0000724 | hsa-miR-372    |
| 11085  | hsa-miR-373          | 1 | MIMAT0000726 | hsa-miR-373    |
| 27545  | hsa-miR-373*         | 1 | MIMAT0000725 | hsa-miR-373*   |
| 145844 | hsa-miR-374a         | 1 | MIMAT0000727 | hsa-miR-374a   |
| 29577  | hsa-miR-374a*        | 1 | MIMAT0004688 | hsa-miR-374a*  |
| 14302  | hsa-miR-374b         | 2 | MIMAT0004955 | hsa-miR-374b   |
| 42476  | hsa-miR-374b*        | 1 | MIMAT0004956 | hsa-miR-374b*  |
| 14302  | hsa-miR-374b         | 2 | MIMAT0018443 | hsa-miR-374c   |
| 46918  | hsa-miR-375          | 1 | MIMAT0000728 | hsa-miR-375    |
| 146009 | hsa-miR-376a         | 1 | MIMAT0000729 | hsa-miR-376a   |
| 42885  | hsa-miR-376a*        | 1 | MIMAT0003386 | hsa-miR-376a*  |
| 145642 | hsa-miR-376b         | 1 | MIMAT0002172 | hsa-miR-376b   |
| 42629  | hsa-miR-376c         | 1 | MIMAT0000720 | hsa-miR-376c   |
| 11091  | hsa-miR-377          | 1 | MIMAT0000730 | hsa-miR-377    |
| 42899  | hsa-miR-377*         | 1 | MIMAT0004689 | hsa-miR-377*   |
| 11105  | hsa-miR-378/hsa-miR- | 3 | MIMAT0000732 | hsa-miR-378    |
| 11092  | hsa-miR-378*         | 1 | MIMAT0000731 | hsa-miR-378*   |
| 11105  | hsa-miR-378/hsa-miR- | 3 | MIMAT0016847 | hsa-miR-378c   |
| 11105  | hsa-miR-378/hsa-miR- | 3 | MIMAT0018926 | hsa-miR-378d   |

|        |                   |   |              |                 |
|--------|-------------------|---|--------------|-----------------|
| 11093  | hsa-miR-379       | 1 | MIMAT0000733 | hsa-miR-379     |
| 42889  | hsa-miR-379*      | 1 | MIMAT0004690 | hsa-miR-379*    |
| 27546  | hsa-miR-380       | 1 | MIMAT0000735 | hsa-miR-380     |
| 28161  | blank             | 1 | MIMAT0000734 | hsa-miR-380*    |
| 13170  | hsa-miR-380*      | 1 | MIMAT0000734 | hsa-miR-380*    |
| 145832 | hsa-miR-381       | 1 | MIMAT0000736 | hsa-miR-381     |
| 145643 | hsa-miR-382       | 1 | MIMAT0000737 | hsa-miR-382     |
| 146024 | hsa-miR-383       | 1 | MIMAT0000738 | hsa-miR-383     |
| 145687 | hsa-miR-384       | 1 | MIMAT0001075 | hsa-miR-384     |
| 146190 | blank             | 1 | MIMAT0018202 | hsa-miR-3927    |
| 46762  | hsa-miRPlus-F1252 | 1 | MIMAT0018205 | hsa-miR-3928    |
| 46736  | hsa-miRPlus-F1015 | 1 | MIMAT0018359 | hsa-miR-3943    |
| 11240  | blank             | 1 | MIMAT0001639 | hsa-miR-409-3p  |
| 145644 | hsa-miR-409-3p    | 1 | MIMAT0001639 | hsa-miR-409-3p  |
| 42448  | blank             | 1 | MIMAT0001638 | hsa-miR-409-5p  |
| 42925  | hsa-miR-409-5p    | 1 | MIMAT0001638 | hsa-miR-409-5p  |
| 11102  | hsa-miR-410       | 1 | MIMAT0002171 | hsa-miR-410     |
| 17482  | hsa-miR-411       | 1 | MIMAT0003329 | hsa-miR-411     |
| 42784  | hsa-miR-411*      | 1 | MIMAT0004813 | hsa-miR-411*    |
| 42764  | hsa-miR-412       | 1 | MIMAT0002170 | hsa-miR-412     |
| 17474  | hsa-miR-421       | 1 | MIMAT0003339 | hsa-miR-421     |
| 11104  | hsa-miR-422a      | 1 | MIMAT0001339 | hsa-miR-422a    |
| 42730  | hsa-miR-423-3p    | 1 | MIMAT0001340 | hsa-miR-423-3p  |
| 27565  | hsa-miR-423-5p    | 1 | MIMAT0004748 | hsa-miR-423-5p  |
| 42965  | hsa-miR-424       | 1 | MIMAT0001341 | hsa-miR-424     |
| 42603  | hsa-miR-424*      | 1 | MIMAT0004749 | hsa-miR-424*    |
| 17608  | hsa-miR-425       | 1 | MIMAT0003393 | hsa-miR-425     |
| 11108  | hsa-miR-425*      | 1 | MIMAT0001343 | hsa-miR-425*    |
| 13171  | hsa-miR-429       | 1 | MIMAT0001536 | hsa-miR-429     |
| 145705 | hsa-miR-431       | 1 | MIMAT0001625 | hsa-miR-431     |
| 42674  | hsa-miR-431*      | 1 | MIMAT0004757 | hsa-miR-431*    |
| 11111  | hsa-miR-432       | 1 | MIMAT0002814 | hsa-miR-432     |
| 42584  | hsa-miR-432*      | 1 | MIMAT0002815 | hsa-miR-432*    |
| 42853  | hsa-miR-433       | 1 | MIMAT0001627 | hsa-miR-433     |
| 46585  | hsa-miRPlus-F1033 | 1 | MIMAT0018997 | hsa-miR-4470    |
| 11113  | hsa-miR-448       | 1 | MIMAT0001532 | hsa-miR-448     |
| 46808  | hsa-miRPlus-E1028 | 1 | MIMAT0019019 | hsa-miR-4485    |
| 145946 | hsa-miR-449a      | 1 | MIMAT0001541 | hsa-miR-449a    |
| 46249  | blank             | 1 | MIMAT0003327 | hsa-miR-449b    |
| 33668  | hsa-miR-449b      | 1 | MIMAT0003327 | hsa-miR-449b    |
| 146127 | hsa-miR-449b*     | 1 | MIMAT0009203 | hsa-miR-449b*   |
| 146151 | hsa-miR-449c      | 1 | MIMAT0010251 | hsa-miR-449c    |
| 146020 | hsa-miR-449c*     | 1 | MIMAT0013771 | hsa-miR-449c*   |
| 17835  | blank             | 1 | MIMAT0001545 | hsa-miR-450a    |
| 18847  | hsa-miR-450a      | 1 | MIMAT0001545 | hsa-miR-450a    |
| 42892  | hsa-miR-450b-3p   | 1 | MIMAT0004910 | hsa-miR-450b-3p |
| 42896  | hsa-miR-450b-5p   | 1 | MIMAT0004909 | hsa-miR-450b-5p |
| 42866  | hsa-miR-451       | 1 | MIMAT0001631 | hsa-miR-451     |
| 29379  | hsa-miR-452       | 1 | MIMAT0001635 | hsa-miR-452     |
| 42598  | hsa-miR-452*      | 1 | MIMAT0001636 | hsa-miR-452*    |
| 146104 | blank             | 1 | MIMAT0019063 | hsa-miR-4524*   |
| 145720 | hsa-miR-454       | 1 | MIMAT0003885 | hsa-miR-454     |
| 28520  | hsa-miR-454*      | 1 | MIMAT0003884 | hsa-miR-454*    |

|        |                   |   |              |                  |
|--------|-------------------|---|--------------|------------------|
| 28950  | hsa-miR-455-3p    | 1 | MIMAT0004784 | hsa-miR-455-3p   |
| 13179  | hsa-miR-455-5p    | 1 | MIMAT0003150 | hsa-miR-455-5p   |
| 46731  | hsa-miRPlus-F1017 | 1 | MIMAT0019724 | hsa-miR-4657     |
| 46678  | hsa-miRPlus-F1077 | 1 | MIMAT0019792 | hsa-miR-4697-3p  |
| 146124 | blank             | 1 | MIMAT0019971 | hsa-miR-4796-3p  |
| 146076 | hsa-miR-483-3p    | 1 | MIMAT0002173 | hsa-miR-483-3p   |
| 42654  | hsa-miR-483-5p    | 1 | MIMAT0004761 | hsa-miR-483-5p   |
| 145753 | hsa-miR-484       | 1 | MIMAT0002174 | hsa-miR-484      |
| 42694  | hsa-miR-485-3p    | 1 | MIMAT0002176 | hsa-miR-485-3p   |
| 42480  | hsa-miR-485-5p    | 1 | MIMAT0002175 | hsa-miR-485-5p   |
| 42946  | hsa-miR-486-3p    | 1 | MIMAT0004762 | hsa-miR-486-3p   |
| 32946  | hsa-miR-486-5p    | 1 | MIMAT0002177 | hsa-miR-486-5p   |
| 13183  | hsa-miR-487a      | 1 | MIMAT0002178 | hsa-miR-487a     |
| 14285  | hsa-miR-487b      | 1 | MIMAT0003180 | hsa-miR-487b     |
| 42704  | hsa-miR-488       | 1 | MIMAT0004763 | hsa-miR-488      |
| 145756 | hsa-miR-488*      | 1 | MIMAT0002804 | hsa-miR-488*     |
| 11121  | hsa-miR-489       | 1 | MIMAT0002805 | hsa-miR-489      |
| 42703  | hsa-miR-490-3p    | 1 | MIMAT0002806 | hsa-miR-490-3p   |
| 17822  | hsa-miR-490-5p    | 1 | MIMAT0004764 | hsa-miR-490-5p   |
| 17927  | hsa-miR-491-3p    | 1 | MIMAT0004765 | hsa-miR-491-3p   |
| 145928 | blank             | 1 | MIMAT0004765 | hsa-miR-491-3p   |
| 11123  | hsa-miR-491-5p    | 1 | MIMAT0002807 | hsa-miR-491-5p   |
| 42661  | hsa-miR-492       | 1 | MIMAT0002812 | hsa-miR-492      |
| 14270  | hsa-miR-493       | 1 | MIMAT0003161 | hsa-miR-493      |
| 11125  | hsa-miR-493*      | 1 | MIMAT0002813 | hsa-miR-493*     |
| 42540  | blank             | 1 | MIMAT0002816 | hsa-miR-494      |
| 145901 | hsa-miR-494       | 1 | MIMAT0002816 | hsa-miR-494      |
| 42676  | hsa-miR-495       | 1 | MIMAT0002817 | hsa-miR-495      |
| 145698 | hsa-miR-496       | 1 | MIMAT0002818 | hsa-miR-496      |
| 42847  | hsa-miR-497       | 1 | MIMAT0002820 | hsa-miR-497      |
| 42558  | hsa-miR-497*      | 1 | MIMAT0004768 | hsa-miR-497*     |
| 42442  | hsa-miR-498       | 1 | MIMAT0002824 | hsa-miR-498      |
| 145692 | hsa-miR-499-3p    | 1 | MIMAT0004772 | hsa-miR-499-3p   |
| 14313  | hsa-miR-499-5p    | 1 | MIMAT0002870 | hsa-miR-499-5p   |
| 17875  | hsa-miR-500       | 1 | MIMAT0004773 | hsa-miR-500a     |
| 46406  | hsa-miR-500*      | 1 | MIMAT0002871 | hsa-miR-500a*    |
| 145727 | blank             | 1 | MIMAT0004774 | hsa-miR-501-3p   |
| 42578  | hsa-miR-501-3p    | 1 | MIMAT0004774 | hsa-miR-501-3p   |
| 145675 | hsa-miR-501-5p    | 1 | MIMAT0002872 | hsa-miR-501-5p   |
| 146178 | hsa-miR-502-3p    | 1 | MIMAT0004775 | hsa-miR-502-3p   |
| 11134  | hsa-miR-502-5p    | 1 | MIMAT0002873 | hsa-miR-502-5p   |
| 46803  | hsa-miR-503       | 1 | MIMAT0002874 | hsa-miR-503      |
| 28480  | hsa-miR-504       | 1 | MIMAT0002875 | hsa-miR-504      |
| 42669  | hsa-miR-505       | 1 | MIMAT0002876 | hsa-miR-505      |
| 42490  | hsa-miR-505*      | 1 | MIMAT0004776 | hsa-miR-505*     |
| 11138  | hsa-miR-506       | 1 | MIMAT0002878 | hsa-miR-506      |
| 11139  | hsa-miR-507       | 1 | MIMAT0002879 | hsa-miR-507      |
| 11140  | hsa-miR-508-3p    | 1 | MIMAT0002880 | hsa-miR-508-3p   |
| 42812  | hsa-miR-508-5p    | 1 | MIMAT0004778 | hsa-miR-508-5p   |
| 145824 | hsa-miR-509-3-5p  | 1 | MIMAT0004975 | hsa-miR-509-3-5p |
| 11141  | hsa-miR-509-3p    | 1 | MIMAT0002881 | hsa-miR-509-3p   |
| 145835 | hsa-miR-509-5p    | 1 | MIMAT0004779 | hsa-miR-509-5p   |
| 11142  | hsa-miR-510       | 1 | MIMAT0002882 | hsa-miR-510      |



|        |                      |   |              |                 |
|--------|----------------------|---|--------------|-----------------|
| 27229  | hsa-miR-511          | 1 | MIMAT0002808 | hsa-miR-511     |
| 11144  | hsa-miR-512-3p       | 1 | MIMAT0002823 | hsa-miR-512-3p  |
| 145690 | hsa-miR-512-5p       | 1 | MIMAT0002822 | hsa-miR-512-5p  |
| 42960  | hsa-miR-513a-3p      | 1 | MIMAT0004777 | hsa-miR-513a-3p |
| 42581  | hsa-miR-513a-5p      | 1 | MIMAT0002877 | hsa-miR-513a-5p |
| 46789  | hsa-miR-513b         | 1 | MIMAT0005788 | hsa-miR-513b    |
| 46398  | hsa-miR-513c         | 1 | MIMAT0005789 | hsa-miR-513c    |
| 42959  | hsa-miR-514          | 1 | MIMAT0002883 | hsa-miR-514     |
| 11148  | hsa-miR-515-3p       | 1 | MIMAT0002827 | hsa-miR-515-3p  |
| 11149  | hsa-miR-515-5p       | 1 | MIMAT0002826 | hsa-miR-515-5p  |
| 145717 | hsa-miR-516a-3p/hsa- | 2 | MIMAT0006778 | hsa-miR-516a-3p |
| 42550  | hsa-miR-516a-5p      | 1 | MIMAT0004770 | hsa-miR-516a-5p |
| 11151  | hsa-miR-516b         | 1 | MIMAT0002859 | hsa-miR-516b    |
| 145717 | hsa-miR-516a-3p/hsa- | 2 | MIMAT0002860 | hsa-miR-516b*   |
| 13130  | hsa-miR-517*         | 1 | MIMAT0002851 | hsa-miR-517*    |
| 145999 | hsa-miR-517a         | 1 | MIMAT0002852 | hsa-miR-517a    |
| 46347  | blank                | 1 | MIMAT0002857 | hsa-miR-517b    |
| 42450  | hsa-miR-517b         | 1 | MIMAT0002857 | hsa-miR-517b    |
| 11154  | hsa-miR-517c         | 1 | MIMAT0002866 | hsa-miR-517c    |
| 11155  | hsa-miR-518a-3p      | 1 | MIMAT0002863 | hsa-miR-518a-3p |
| 145905 | hsa-miR-518a-5p/hsa- | 2 | MIMAT0005457 | hsa-miR-518a-5p |
| 11177  | blank                | 2 | MIMAT0005457 | hsa-miR-518a-5p |
| 145725 | hsa-miR-518b         | 1 | MIMAT0002844 | hsa-miR-518b    |
| 105441 | hsa-miR-518c         | 1 | MIMAT0002848 | hsa-miR-518c    |
| 145821 | hsa-miR-518c*        | 1 | MIMAT0002847 | hsa-miR-518c*   |
| 145965 | hsa-miR-518d-3p      | 1 | MIMAT0002864 | hsa-miR-518d-3p |
| 146136 | hsa-miR-518d-5p/hsa- | 3 | MIMAT0005456 | hsa-miR-518d-5p |
| 11159  | hsa-miR-518e         | 1 | MIMAT0002861 | hsa-miR-518e    |
| 13137  | hsa-miR-518e*/hsa-m  | 6 | MIMAT0005450 | hsa-miR-518e*   |
| 145748 | hsa-miR-518f         | 1 | MIMAT0002842 | hsa-miR-518f    |
| 46622  | hsa-miR-518f*        | 1 | MIMAT0002841 | hsa-miR-518f*   |
| 46401  | hsa-miR-519a         | 1 | MIMAT0002869 | hsa-miR-519a    |
| 13137  | hsa-miR-518e*/hsa-m  | 6 | MIMAT0005452 | hsa-miR-519a*   |
| 46231  | hsa-miR-519b-3p      | 1 | MIMAT0002837 | hsa-miR-519b-3p |
| 13137  | hsa-miR-518e*/hsa-m  | 6 | MIMAT0005454 | hsa-miR-519b-5p |
| 145723 | hsa-miR-519c-3p      | 1 | MIMAT0002832 | hsa-miR-519c-3p |
| 13137  | hsa-miR-518e*/hsa-m  | 6 | MIMAT0002831 | hsa-miR-519c-5p |
| 46221  | hsa-miR-519d         | 1 | MIMAT0002853 | hsa-miR-519d    |
| 11164  | hsa-miR-519e         | 1 | MIMAT0002829 | hsa-miR-519e    |
| 13132  | hsa-miR-519e*        | 1 | MIMAT0002828 | hsa-miR-519e*   |
| 11165  | hsa-miR-520a-3p      | 1 | MIMAT0002834 | hsa-miR-520a-3p |
| 13133  | hsa-miR-520a-5p      | 1 | MIMAT0002833 | hsa-miR-520a-5p |
| 11166  | hsa-miR-520b/hsa-mif | 2 | MIMAT0002843 | hsa-miR-520b    |
| 11166  | hsa-miR-520b/hsa-mif | 2 | MIMAT0002846 | hsa-miR-520c-3p |
| 46227  | blank                | 1 | MIMAT0002846 | hsa-miR-520c-3p |
| 145819 | blank                | 1 | MIMAT0002846 | hsa-miR-520c-3p |
| 146136 | hsa-miR-518d-5p/hsa- | 3 | MIMAT0005455 | hsa-miR-520c-5p |
| 11168  | hsa-miR-520d-3p      | 1 | MIMAT0002856 | hsa-miR-520d-3p |
| 46354  | hsa-miR-520d-5p      | 1 | MIMAT0002855 | hsa-miR-520d-5p |
| 145722 | hsa-miR-520e         | 1 | MIMAT0002825 | hsa-miR-520e    |
| 42455  | hsa-miR-520f         | 1 | MIMAT0002830 | hsa-miR-520f    |
| 13146  | blank                | 2 | MIMAT0002858 | hsa-miR-520g    |
| 46500  | hsa-miR-520g/hsa-mif | 2 | MIMAT0002858 | hsa-miR-520g    |

|        |                      |   |              |                 |
|--------|----------------------|---|--------------|-----------------|
| 46454  | hsa-miR-520g         | 1 | MIMAT0002858 | hsa-miR-520g    |
| 13146  | blank                | 2 | MIMAT0002867 | hsa-miR-520h    |
| 46500  | hsa-miR-520g/hsa-miF | 2 | MIMAT0002867 | hsa-miR-520h    |
| 11171  | hsa-miR-521          | 1 | MIMAT0002854 | hsa-miR-521     |
| 42483  | hsa-miR-522          | 1 | MIMAT0002868 | hsa-miR-522     |
| 13137  | hsa-miR-518e*/hsa-m  | 6 | MIMAT0005451 | hsa-miR-522*    |
| 145754 | hsa-miR-523          | 1 | MIMAT0002840 | hsa-miR-523     |
| 13137  | hsa-miR-518e*/hsa-m  | 6 | MIMAT0005449 | hsa-miR-523*    |
| 31349  | hsa-miR-524-3p       | 1 | MIMAT0002850 | hsa-miR-524-3p  |
| 46235  | hsa-miR-524-5p       | 1 | MIMAT0002849 | hsa-miR-524-5p  |
| 46495  | hsa-miR-525-3p       | 1 | MIMAT0002839 | hsa-miR-525-3p  |
| 11175  | hsa-miR-525-5p       | 1 | MIMAT0002838 | hsa-miR-525-5p  |
| 146136 | hsa-miR-518d-5p/hsa- | 3 | MIMAT0002845 | hsa-miR-526a    |
| 46744  | hsa-miR-526b         | 1 | MIMAT0002835 | hsa-miR-526b    |
| 145785 | hsa-miR-526b*        | 1 | MIMAT0002836 | hsa-miR-526b*   |
| 145905 | hsa-miR-518a-5p/hsa- | 2 | MIMAT0002862 | hsa-miR-527     |
| 11177  | blank                | 2 | MIMAT0002862 | hsa-miR-527     |
| 42732  | hsa-miR-532-3p       | 1 | MIMAT0004780 | hsa-miR-532-3p  |
| 17624  | hsa-miR-532-5p       | 1 | MIMAT0002888 | hsa-miR-532-5p  |
| 14271  | hsa-miR-539          | 1 | MIMAT0003163 | hsa-miR-539     |
| 42635  | hsa-miR-541          | 1 | MIMAT0004920 | hsa-miR-541     |
| 42617  | hsa-miR-541*         | 1 | MIMAT0004919 | hsa-miR-541*    |
| 14272  | hsa-miR-542-3p       | 1 | MIMAT0003389 | hsa-miR-542-3p  |
| 42811  | hsa-miR-542-5p       | 1 | MIMAT0003340 | hsa-miR-542-5p  |
| 145689 | hsa-miR-543          | 1 | MIMAT0004954 | hsa-miR-543     |
| 42470  | blank                | 1 | MIMAT0004954 | hsa-miR-543     |
| 33043  | hsa-miR-544          | 1 | MIMAT0003164 | hsa-miR-544     |
| 145741 | hsa-miR-545          | 1 | MIMAT0003165 | hsa-miR-545     |
| 42956  | hsa-miR-545*         | 1 | MIMAT0004785 | hsa-miR-545*    |
| 17535  | hsa-miR-548a-3p      | 1 | MIMAT0003251 | hsa-miR-548a-3p |
| 30493  | hsa-miR-548a-5p      | 1 | MIMAT0004803 | hsa-miR-548a-5p |
| 17298  | hsa-miR-548b-3p      | 1 | MIMAT0003254 | hsa-miR-548b-3p |
| 42791  | hsa-miR-548b-5p      | 1 | MIMAT0004798 | hsa-miR-548b-5p |
| 145686 | hsa-miR-548c-3p      | 1 | MIMAT0003285 | hsa-miR-548c-3p |
| 42777  | hsa-miR-548c-5p      | 1 | MIMAT0004806 | hsa-miR-548c-5p |
| 27549  | hsa-miR-548d-3p      | 1 | MIMAT0003323 | hsa-miR-548d-3p |
| 42756  | hsa-miR-548d-5p      | 1 | MIMAT0004812 | hsa-miR-548d-5p |
| 46703  | hsa-miR-548e         | 1 | MIMAT0005874 | hsa-miR-548e    |
| 45736  | hsa-miR-548f         | 1 | MIMAT0005895 | hsa-miR-548f    |
| 46940  | hsa-miR-548g         | 1 | MIMAT0005912 | hsa-miR-548g    |
| 46414  | hsa-miR-548h         | 1 | MIMAT0005928 | hsa-miR-548h    |
| 46704  | hsa-miR-548i         | 1 | MIMAT0005935 | hsa-miR-548i    |
| 46592  | hsa-miR-548j         | 1 | MIMAT0005875 | hsa-miR-548j    |
| 46705  | hsa-miR-548k         | 1 | MIMAT0005882 | hsa-miR-548k    |
| 46415  | hsa-miR-548l         | 1 | MIMAT0005889 | hsa-miR-548l    |
| 46335  | hsa-miR-548m         | 1 | MIMAT0005917 | hsa-miR-548m    |
| 46929  | hsa-miR-548n         | 1 | MIMAT0005916 | hsa-miR-548n    |
| 46450  | hsa-miR-548o         | 1 | MIMAT0005919 | hsa-miR-548o    |
| 46355  | hsa-miR-548p         | 1 | MIMAT0005934 | hsa-miR-548p    |
| 146148 | hsa-miR-548q         | 1 | MIMAT0011163 | hsa-miR-548q    |
| 145762 | hsa-miR-549          | 1 | MIMAT0003333 | hsa-miR-549     |
| 145789 | hsa-miR-550          | 1 | MIMAT0004800 | hsa-miR-550a    |
| 17660  | hsa-miR-550*         | 1 | MIMAT0003257 | hsa-miR-550a*   |

|        |                |   |              |                |
|--------|----------------|---|--------------|----------------|
| 17272  | hsa-miR-551a   | 1 | MIMAT0003214 | hsa-miR-551a   |
| 42917  | hsa-miR-551b   | 1 | MIMAT0003233 | hsa-miR-551b   |
| 42781  | hsa-miR-551b*  | 1 | MIMAT0004794 | hsa-miR-551b*  |
| 17668  | hsa-miR-552    | 1 | MIMAT0003215 | hsa-miR-552    |
| 29460  | hsa-miR-553    | 1 | MIMAT0003216 | hsa-miR-553    |
| 42766  | hsa-miR-554    | 1 | MIMAT0003217 | hsa-miR-554    |
| 17612  | hsa-miR-555    | 1 | MIMAT0003219 | hsa-miR-555    |
| 42447  | hsa-miR-556-3p | 1 | MIMAT0004793 | hsa-miR-556-3p |
| 145758 | hsa-miR-556-5p | 1 | MIMAT0003220 | hsa-miR-556-5p |
| 42760  | hsa-miR-557    | 1 | MIMAT0003221 | hsa-miR-557    |
| 17652  | hsa-miR-558    | 1 | MIMAT0003222 | hsa-miR-558    |
| 31076  | hsa-miR-559    | 1 | MIMAT0003223 | hsa-miR-559    |
| 31517  | hsa-miR-561    | 1 | MIMAT0003225 | hsa-miR-561    |
| 17536  | hsa-miR-562    | 1 | MIMAT0003226 | hsa-miR-562    |
| 17569  | hsa-miR-563    | 1 | MIMAT0003227 | hsa-miR-563    |
| 42944  | hsa-miR-564    | 1 | MIMAT0003228 | hsa-miR-564    |
| 42772  | hsa-miR-566    | 1 | MIMAT0003230 | hsa-miR-566    |
| 17634  | hsa-miR-567    | 1 | MIMAT0003231 | hsa-miR-567    |
| 145744 | hsa-miR-568    | 1 | MIMAT0003232 | hsa-miR-568    |
| 14854  | hsa-miR-569    | 1 | MIMAT0003234 | hsa-miR-569    |
| 17814  | hsa-miR-570    | 1 | MIMAT0003235 | hsa-miR-570    |
| 17490  | hsa-miR-571    | 1 | MIMAT0003236 | hsa-miR-571    |
| 42596  | hsa-miR-572    | 1 | MIMAT0003237 | hsa-miR-572    |
| 17641  | hsa-miR-573    | 1 | MIMAT0003238 | hsa-miR-573    |
| 28966  | hsa-miR-574-3p | 1 | MIMAT0003239 | hsa-miR-574-3p |
| 27740  | hsa-miR-574-5p | 1 | MIMAT0004795 | hsa-miR-574-5p |
| 17626  | hsa-miR-575    | 1 | MIMAT0003240 | hsa-miR-575    |
| 17958  | hsa-miR-576-3p | 1 | MIMAT0004796 | hsa-miR-576-3p |
| 42446  | hsa-miR-576-5p | 1 | MIMAT0003241 | hsa-miR-576-5p |
| 42837  | hsa-miR-577    | 1 | MIMAT0003242 | hsa-miR-577    |
| 17302  | hsa-miR-578    | 1 | MIMAT0003243 | hsa-miR-578    |
| 42622  | hsa-miR-579    | 1 | MIMAT0003244 | hsa-miR-579    |
| 17459  | hsa-miR-580    | 1 | MIMAT0003245 | hsa-miR-580    |
| 14962  | hsa-miR-581    | 1 | MIMAT0003246 | hsa-miR-581    |
| 29328  | hsa-miR-582-3p | 1 | MIMAT0004797 | hsa-miR-582-3p |
| 42800  | blank          | 1 | MIMAT0003247 | hsa-miR-582-5p |
| 42544  | hsa-miR-582-5p | 1 | MIMAT0003247 | hsa-miR-582-5p |
| 17295  | hsa-miR-583    | 1 | MIMAT0003248 | hsa-miR-583    |
| 145647 | hsa-miR-584    | 1 | MIMAT0003249 | hsa-miR-584    |
| 17546  | hsa-miR-585    | 1 | MIMAT0003250 | hsa-miR-585    |
| 42754  | hsa-miR-586    | 1 | MIMAT0003252 | hsa-miR-586    |
| 17594  | hsa-miR-587    | 1 | MIMAT0003253 | hsa-miR-587    |
| 17630  | hsa-miR-588    | 1 | MIMAT0003255 | hsa-miR-588    |
| 42542  | hsa-miR-589    | 1 | MIMAT0004799 | hsa-miR-589    |
| 17570  | hsa-miR-589*   | 1 | MIMAT0003256 | hsa-miR-589*   |
| 42567  | hsa-miR-590-3p | 1 | MIMAT0004801 | hsa-miR-590-3p |
| 17503  | hsa-miR-590-5p | 1 | MIMAT0003258 | hsa-miR-590-5p |
| 42482  | hsa-miR-591    | 1 | MIMAT0003259 | hsa-miR-591    |
| 17312  | hsa-miR-592    | 1 | MIMAT0003260 | hsa-miR-592    |
| 42504  | hsa-miR-593    | 1 | MIMAT0004802 | hsa-miR-593    |
| 42478  | hsa-miR-593*   | 1 | MIMAT0003261 | hsa-miR-593*   |
| 17349  | hsa-miR-595    | 1 | MIMAT0003263 | hsa-miR-595    |
| 145833 | hsa-miR-596    | 1 | MIMAT0003264 | hsa-miR-596    |

|        |                |   |              |                |
|--------|----------------|---|--------------|----------------|
| 42818  | hsa-miR-597    | 1 | MIMAT0003265 | hsa-miR-597    |
| 145648 | hsa-miR-598    | 1 | MIMAT0003266 | hsa-miR-598    |
| 145989 | blank          | 1 | MIMAT0003267 | hsa-miR-599    |
| 30592  | hsa-miR-599    | 1 | MIMAT0003267 | hsa-miR-599    |
| 17377  | hsa-miR-600    | 1 | MIMAT0003268 | hsa-miR-600    |
| 17498  | hsa-miR-601    | 1 | MIMAT0003269 | hsa-miR-601    |
| 42531  | hsa-miR-602    | 1 | MIMAT0003270 | hsa-miR-602    |
| 17393  | hsa-miR-603    | 1 | MIMAT0003271 | hsa-miR-603    |
| 17592  | hsa-miR-604    | 1 | MIMAT0003272 | hsa-miR-604    |
| 145736 | hsa-miR-605    | 1 | MIMAT0003273 | hsa-miR-605    |
| 29883  | hsa-miR-606    | 1 | MIMAT0003274 | hsa-miR-606    |
| 32190  | hsa-miR-607    | 1 | MIMAT0003275 | hsa-miR-607    |
| 42543  | hsa-miR-608    | 1 | MIMAT0003276 | hsa-miR-608    |
| 17353  | hsa-miR-609    | 1 | MIMAT0003277 | hsa-miR-609    |
| 17445  | hsa-miR-610    | 1 | MIMAT0003278 | hsa-miR-610    |
| 145971 | hsa-miR-611    | 1 | MIMAT0003279 | hsa-miR-611    |
| 27551  | hsa-miR-612    | 1 | MIMAT0003280 | hsa-miR-612    |
| 17577  | hsa-miR-613    | 1 | MIMAT0003281 | hsa-miR-613    |
| 145750 | hsa-miR-614    | 1 | MIMAT0003282 | hsa-miR-614    |
| 27672  | hsa-miR-615-3p | 1 | MIMAT0003283 | hsa-miR-615-3p |
| 42690  | hsa-miR-615-5p | 1 | MIMAT0004804 | hsa-miR-615-5p |
| 42870  | hsa-miR-616    | 1 | MIMAT0004805 | hsa-miR-616    |
| 17289  | hsa-miR-616*   | 1 | MIMAT0003284 | hsa-miR-616*   |
| 17552  | hsa-miR-617    | 1 | MIMAT0003286 | hsa-miR-617    |
| 17336  | hsa-miR-618    | 1 | MIMAT0003287 | hsa-miR-618    |
| 42757  | hsa-miR-619    | 1 | MIMAT0003288 | hsa-miR-619    |
| 32825  | hsa-miR-620    | 1 | MIMAT0003289 | hsa-miR-620    |
| 46301  | hsa-miR-621    | 1 | MIMAT0003290 | hsa-miR-621    |
| 17493  | hsa-miR-622    | 1 | MIMAT0003291 | hsa-miR-622    |
| 46556  | hsa-miR-623    | 1 | MIMAT0003292 | hsa-miR-623    |
| 32095  | hsa-miR-624    | 1 | MIMAT0004807 | hsa-miR-624    |
| 42557  | hsa-miR-624*   | 1 | MIMAT0003293 | hsa-miR-624*   |
| 145831 | hsa-miR-625    | 1 | MIMAT0003294 | hsa-miR-625    |
| 145740 | hsa-miR-625*   | 1 | MIMAT0004808 | hsa-miR-625*   |
| 33407  | hsa-miR-626    | 1 | MIMAT0003295 | hsa-miR-626    |
| 17625  | hsa-miR-627    | 1 | MIMAT0003296 | hsa-miR-627    |
| 42958  | hsa-miR-628-3p | 1 | MIMAT0003297 | hsa-miR-628-3p |
| 17870  | hsa-miR-628-5p | 1 | MIMAT0004809 | hsa-miR-628-5p |
| 17961  | hsa-miR-629    | 1 | MIMAT0004810 | hsa-miR-629    |
| 17566  | hsa-miR-629*   | 1 | MIMAT0003298 | hsa-miR-629*   |
| 17327  | hsa-miR-630    | 1 | MIMAT0003299 | hsa-miR-630    |
| 42700  | hsa-miR-631    | 1 | MIMAT0003300 | hsa-miR-631    |
| 17444  | hsa-miR-632    | 1 | MIMAT0003302 | hsa-miR-632    |
| 32711  | hsa-miR-633    | 1 | MIMAT0003303 | hsa-miR-633    |
| 42591  | hsa-miR-634    | 1 | MIMAT0003304 | hsa-miR-634    |
| 17391  | hsa-miR-635    | 1 | MIMAT0003305 | hsa-miR-635    |
| 42750  | hsa-miR-636    | 1 | MIMAT0003306 | hsa-miR-636    |
| 17354  | hsa-miR-637    | 1 | MIMAT0003307 | hsa-miR-637    |
| 42832  | hsa-miR-638    | 1 | MIMAT0003308 | hsa-miR-638    |
| 145962 | hsa-miR-639    | 1 | MIMAT0003309 | hsa-miR-639    |
| 42758  | hsa-miR-640    | 1 | MIMAT0003310 | hsa-miR-640    |
| 17530  | hsa-miR-641    | 1 | MIMAT0003311 | hsa-miR-641    |
| 42679  | hsa-miR-642    | 1 | MIMAT0003312 | hsa-miR-642a   |

|        |                   |   |              |                |
|--------|-------------------|---|--------------|----------------|
| 17325  | hsa-miR-643       | 1 | MIMAT0003313 | hsa-miR-643    |
| 17563  | hsa-miR-644       | 1 | MIMAT0003314 | hsa-miR-644    |
| 17613  | hsa-miR-645       | 1 | MIMAT0003315 | hsa-miR-645    |
| 145963 | hsa-miR-646       | 1 | MIMAT0003316 | hsa-miR-646    |
| 42746  | hsa-miR-647       | 1 | MIMAT0003317 | hsa-miR-647    |
| 145715 | hsa-miR-648       | 1 | MIMAT0003318 | hsa-miR-648    |
| 15619  | hsa-miR-649       | 1 | MIMAT0003319 | hsa-miR-649    |
| 17593  | hsa-miR-650       | 1 | MIMAT0003320 | hsa-miR-650    |
| 17394  | hsa-miR-651       | 1 | MIMAT0003321 | hsa-miR-651    |
| 42827  | hsa-miR-652       | 1 | MIMAT0003322 | hsa-miR-652    |
| 42607  | hsa-miR-653       | 1 | MIMAT0003328 | hsa-miR-653    |
| 21498  | hsa-miR-654-3p    | 1 | MIMAT0004814 | hsa-miR-654-3p |
| 42843  | hsa-miR-654-5p    | 1 | MIMAT0003330 | hsa-miR-654-5p |
| 145696 | hsa-miR-655       | 1 | MIMAT0003331 | hsa-miR-655    |
| 29736  | hsa-miR-656       | 1 | MIMAT0003332 | hsa-miR-656    |
| 17460  | hsa-miR-657       | 1 | MIMAT0003335 | hsa-miR-657    |
| 145842 | hsa-miR-658       | 1 | MIMAT0003336 | hsa-miR-658    |
| 42749  | hsa-miR-659       | 1 | MIMAT0003337 | hsa-miR-659    |
| 17338  | hsa-miR-660       | 1 | MIMAT0003338 | hsa-miR-660    |
| 42535  | hsa-miR-661       | 1 | MIMAT0003324 | hsa-miR-661    |
| 145839 | hsa-miR-662       | 1 | MIMAT0003325 | hsa-miR-662    |
| 42807  | hsa-miR-663       | 1 | MIMAT0003326 | hsa-miR-663    |
| 145976 | hsa-miR-663b      | 1 | MIMAT0005867 | hsa-miR-663b   |
| 145973 | hsa-miR-664       | 1 | MIMAT0005949 | hsa-miR-664    |
| 46829  | hsa-miR-664*      | 1 | MIMAT0005948 | hsa-miR-664*   |
| 145768 | hsa-miR-665       | 1 | MIMAT0004952 | hsa-miR-665    |
| 145701 | hsa-miR-668       | 1 | MIMAT0003881 | hsa-miR-668    |
| 146006 | hsa-miR-670       | 1 | MIMAT0010357 | hsa-miR-670    |
| 42525  | hsa-miR-671-3p    | 1 | MIMAT0004819 | hsa-miR-671-3p |
| 145716 | hsa-miR-671-5p    | 1 | MIMAT0003880 | hsa-miR-671-5p |
| 42761  | hsa-miR-675       | 1 | MIMAT0004284 | hsa-miR-675    |
| 42859  | hsa-miR-675*      | 1 | MIMAT0006790 | hsa-miR-675*   |
| 46452  | hsa-miRPlus-F1057 | 1 | MIMAT0018204 | hsa-miR-676    |
| 29490  | hsa-miR-7         | 1 | MIMAT0000252 | hsa-miR-7      |
| 11277  | hsa-miR-7-1*      | 1 | MIMAT0004553 | hsa-miR-7-1*   |
| 42964  | hsa-miR-7-2*      | 1 | MIMAT0004554 | hsa-miR-7-2*   |
| 29190  | hsa-miR-708       | 1 | MIMAT0004926 | hsa-miR-708    |
| 17347  | hsa-miR-708*      | 1 | MIMAT0004927 | hsa-miR-708*   |
| 146196 | hsa-miR-711       | 1 | MIMAT0012734 | hsa-miR-711    |
| 146064 | hsa-miR-718       | 1 | MIMAT0012735 | hsa-miR-718    |
| 42751  | hsa-miR-720       | 1 | MIMAT0005954 | hsa-miR-720    |
| 27568  | hsa-miR-744       | 1 | MIMAT0004945 | hsa-miR-744    |
| 42970  | hsa-miR-744*      | 1 | MIMAT0004946 | hsa-miR-744*   |
| 28759  | hsa-miR-758       | 1 | MIMAT0003879 | hsa-miR-758    |
| 23767  | hsa-miR-759       | 1 | MIMAT0010497 | hsa-miR-759    |
| 42852  | hsa-miR-760       | 1 | MIMAT0004957 | hsa-miR-760    |
| 32608  | hsa-miR-761       | 1 | MIMAT0010364 | hsa-miR-761    |
| 146107 | hsa-miR-762       | 1 | MIMAT0010313 | hsa-miR-762    |
| 146096 | hsa-miR-764       | 1 | MIMAT0010367 | hsa-miR-764    |
| 145805 | hsa-miR-765       | 1 | MIMAT0003945 | hsa-miR-765    |
| 145847 | hsa-miR-766       | 1 | MIMAT0003888 | hsa-miR-766    |
| 28396  | hsa-miR-767-3p    | 1 | MIMAT0003883 | hsa-miR-767-3p |
| 28009  | hsa-miR-767-5p    | 1 | MIMAT0003882 | hsa-miR-767-5p |

|        |                |   |              |                |
|--------|----------------|---|--------------|----------------|
| 146111 | blank          | 1 | MIMAT0003882 | hsa-miR-767-5p |
| 42828  | hsa-miR-769-3p | 1 | MIMAT0003887 | hsa-miR-769-3p |
| 32891  | hsa-miR-769-5p | 1 | MIMAT0003886 | hsa-miR-769-5p |
| 28251  | hsa-miR-770-5p | 1 | MIMAT0003948 | hsa-miR-770-5p |
| 30442  | hsa-miR-802    | 1 | MIMAT0004185 | hsa-miR-802    |
| 17917  | hsa-miR-873    | 1 | MIMAT0004953 | hsa-miR-873    |
| 42808  | hsa-miR-874    | 1 | MIMAT0004911 | hsa-miR-874    |
| 17817  | hsa-miR-875-3p | 1 | MIMAT0004923 | hsa-miR-875-3p |
| 145721 | hsa-miR-875-5p | 1 | MIMAT0004922 | hsa-miR-875-5p |
| 28884  | hsa-miR-876-3p | 1 | MIMAT0004925 | hsa-miR-876-3p |
| 42940  | hsa-miR-876-5p | 1 | MIMAT0004924 | hsa-miR-876-5p |
| 30033  | hsa-miR-877    | 1 | MIMAT0004949 | hsa-miR-877    |
| 42771  | hsa-miR-877*   | 1 | MIMAT0004950 | hsa-miR-877*   |
| 42633  | hsa-miR-885-3p | 1 | MIMAT0004948 | hsa-miR-885-3p |
| 46259  | hsa-miR-885-5p | 1 | MIMAT0004947 | hsa-miR-885-5p |
| 145724 | hsa-miR-887    | 1 | MIMAT0004951 | hsa-miR-887    |
| 28889  | hsa-miR-888    | 1 | MIMAT0004916 | hsa-miR-888    |
| 42825  | hsa-miR-888*   | 1 | MIMAT0004917 | hsa-miR-888*   |
| 42556  | hsa-miR-889    | 1 | MIMAT0004921 | hsa-miR-889    |
| 28047  | hsa-miR-890    | 1 | MIMAT0004912 | hsa-miR-890    |
| 27961  | hsa-miR-891a   | 1 | MIMAT0004902 | hsa-miR-891a   |
| 21501  | hsa-miR-891b   | 1 | MIMAT0004913 | hsa-miR-891b   |
| 42858  | hsa-miR-892a   | 1 | MIMAT0004907 | hsa-miR-892a   |
| 42493  | hsa-miR-892b   | 1 | MIMAT0004918 | hsa-miR-892b   |
| 4040   | blank          | 1 | MIMAT0000441 | hsa-miR-9      |
| 145649 | hsa-miR-9      | 1 | MIMAT0000441 | hsa-miR-9      |
| 29852  | hsa-miR-9*     | 1 | MIMAT0000442 | hsa-miR-9*     |
| 42932  | hsa-miR-920    | 1 | MIMAT0004970 | hsa-miR-920    |
| 46507  | hsa-miR-921    | 1 | MIMAT0004971 | hsa-miR-921    |
| 42683  | hsa-miR-922    | 1 | MIMAT0004972 | hsa-miR-922    |
| 42788  | hsa-miR-924    | 1 | MIMAT0004974 | hsa-miR-924    |
| 42728  | blank          | 1 | MIMAT0000092 | hsa-miR-92a    |
| 145693 | hsa-miR-92a    | 1 | MIMAT0000092 | hsa-miR-92a    |
| 42926  | hsa-miR-92a-1* | 1 | MIMAT0004507 | hsa-miR-92a-1* |
| 42801  | hsa-miR-92a-2* | 1 | MIMAT0004508 | hsa-miR-92a-2* |
| 145884 | blank          | 1 | MIMAT0003218 | hsa-miR-92b    |
| 17718  | hsa-miR-92b    | 1 | MIMAT0003218 | hsa-miR-92b    |
| 42717  | hsa-miR-92b*   | 1 | MIMAT0004792 | hsa-miR-92b*   |
| 30687  | hsa-miR-93     | 1 | MIMAT0000093 | hsa-miR-93     |
| 42747  | hsa-miR-93*    | 1 | MIMAT0004509 | hsa-miR-93*    |
| 42539  | hsa-miR-933    | 1 | MIMAT0004976 | hsa-miR-933    |
| 17863  | hsa-miR-934    | 1 | MIMAT0004977 | hsa-miR-934    |
| 145742 | hsa-miR-935    | 1 | MIMAT0004978 | hsa-miR-935    |
| 42869  | hsa-miR-936    | 1 | MIMAT0004979 | hsa-miR-936    |
| 42514  | hsa-miR-937    | 1 | MIMAT0004980 | hsa-miR-937    |
| 42776  | hsa-miR-938    | 1 | MIMAT0004981 | hsa-miR-938    |
| 145980 | hsa-miR-939    | 1 | MIMAT0004982 | hsa-miR-939    |
| 146115 | hsa-miR-940    | 1 | MIMAT0004983 | hsa-miR-940    |
| 42814  | hsa-miR-941    | 1 | MIMAT0004984 | hsa-miR-941    |
| 42608  | hsa-miR-942    | 1 | MIMAT0004985 | hsa-miR-942    |
| 42696  | hsa-miR-943    | 1 | MIMAT0004986 | hsa-miR-943    |
| 42873  | hsa-miR-944    | 1 | MIMAT0004987 | hsa-miR-944    |
| 11181  | hsa-miR-95     | 1 | MIMAT0000094 | hsa-miR-95     |

|        |              |   |              |              |
|--------|--------------|---|--------------|--------------|
| 13147  | hsa-miR-96   | 1 | MIMAT0000095 | hsa-miR-96   |
| 42971  | hsa-miR-96*  | 1 | MIMAT0004510 | hsa-miR-96*  |
| 11182  | hsa-miR-98   | 1 | MIMAT0000096 | hsa-miR-98   |
| 42708  | hsa-miR-99a  | 1 | MIMAT0000097 | hsa-miR-99a  |
| 145651 | hsa-miR-99a* | 1 | MIMAT0004511 | hsa-miR-99a* |
| 11184  | hsa-miR-99b  | 1 | MIMAT0000689 | hsa-miR-99b  |
| 17898  | hsa-miR-99b* | 1 | MIMAT0004678 | hsa-miR-99b* |

Table S2B

| Probe_ID | mir_ID         | miRBase 15. # targets | MIMAT ID  | mir_ID         | miRBase 17.0 |
|----------|----------------|-----------------------|-----------|----------------|--------------|
| 17748    | blank          | 3                     | MI0000060 | hsa-let-7a-1   |              |
| 146011   | hsa-let-7a     | 3                     | MI0000060 | hsa-let-7a-1   |              |
| 17888    | hsa-let-7a*    | 2                     | MI0000060 | hsa-let-7a-1   |              |
| 17748    | blank          | 3                     | MI0000061 | hsa-let-7a-2   |              |
| 146011   | hsa-let-7a     | 3                     | MI0000061 | hsa-let-7a-2   |              |
| 42530    | hsa-let-7a-2*  | 1                     | MI0000061 | hsa-let-7a-2   |              |
| 17748    | blank          | 3                     | MI0000062 | hsa-let-7a-3   |              |
| 146011   | hsa-let-7a     | 3                     | MI0000062 | hsa-let-7a-3   |              |
| 17888    | hsa-let-7a*    | 2                     | MI0000062 | hsa-let-7a-3   |              |
| 42769    | hsa-let-7b*    | 1                     | MI0000063 | hsa-let-7b     |              |
| 17749    | hsa-let-7b     | 1                     | MI0000063 | hsa-let-7b     |              |
| 42653    | hsa-let-7c*    | 1                     | MI0000064 | hsa-let-7c     |              |
| 145820   | hsa-let-7c     | 1                     | MI0000064 | hsa-let-7c     |              |
| 19004    | blank          | 1                     | MI0000064 | hsa-let-7c     |              |
| 42668    | blank          | 1                     | MI0000064 | hsa-let-7c     |              |
| 46437    | blank          | 1                     | MI0000065 | hsa-let-7d     |              |
| 145968   | hsa-let-7d     | 1                     | MI0000065 | hsa-let-7d     |              |
| 145633   | hsa-let-7d*    | 1                     | MI0000065 | hsa-let-7d     |              |
| 46436    | blank          | 1                     | MI0000066 | hsa-let-7e     |              |
| 42743    | hsa-let-7e*    | 1                     | MI0000066 | hsa-let-7e     |              |
| 145846   | hsa-let-7e     | 1                     | MI0000066 | hsa-let-7e     |              |
| 17752    | hsa-let-7f     | 2                     | MI0000067 | hsa-let-7f-1   |              |
| 46435    | blank          | 2                     | MI0000067 | hsa-let-7f-1   |              |
| 145840   | hsa-let-7f-1*  | 1                     | MI0000067 | hsa-let-7f-1   |              |
| 17752    | hsa-let-7f     | 2                     | MI0000068 | hsa-let-7f-2   |              |
| 46435    | blank          | 2                     | MI0000068 | hsa-let-7f-2   |              |
| 42742    | hsa-let-7f-2*  | 1                     | MI0000068 | hsa-let-7f-2   |              |
| 46438    | hsa-let-7g     | 1                     | MI0000433 | hsa-let-7g     |              |
| 42778    | hsa-let-7g*    | 1                     | MI0000433 | hsa-let-7g     |              |
| 9938     | hsa-let-7i     | 1                     | MI0000434 | hsa-let-7i     |              |
| 145746   | hsa-let-7i*    | 1                     | MI0000434 | hsa-let-7i     |              |
| 10916    | hsa-miR-1      | 2                     | MI0000651 | hsa-mir-1-1    |              |
| 10916    | hsa-miR-1      | 2                     | MI0000437 | hsa-mir-1-2    |              |
| 145694   | hsa-miR-100*   | 1                     | MI0000102 | hsa-mir-100    |              |
| 145943   | hsa-miR-100    | 1                     | MI0000102 | hsa-mir-100    |              |
| 31026    | hsa-miR-101    | 2                     | MI0000103 | hsa-mir-101-1  |              |
| 17935    | hsa-miR-101*   | 1                     | MI0000103 | hsa-mir-101-1  |              |
| 31026    | hsa-miR-101    | 2                     | MI0000739 | hsa-mir-101-2  |              |
| 10919    | hsa-miR-103    | 2                     | MI0000109 | hsa-mir-103a-1 |              |
| 10919    | hsa-miR-103    | 2                     | MI0000108 | hsa-mir-103a-2 |              |
| 146223   | hsa-miR-103-2* | 1                     | MI0000108 | hsa-mir-103a-2 |              |
| 146033   | hsa-miR-103-as | 2                     | MI0007261 | hsa-mir-103b-1 |              |
| 146033   | hsa-miR-103-as | 2                     | MI0007262 | hsa-mir-103b-2 |              |
| 5250     | hsa-miR-105    | 2                     | MI0000111 | hsa-mir-105-1  |              |
| 42562    | hsa-miR-105*   | 2                     | MI0000111 | hsa-mir-105-1  |              |
| 5250     | hsa-miR-105    | 2                     | MI0000112 | hsa-mir-105-2  |              |
| 42562    | hsa-miR-105*   | 2                     | MI0000112 | hsa-mir-105-2  |              |
| 42508    | hsa-miR-106a*  | 1                     | MI0000113 | hsa-mir-106a   |              |
| 46801    | hsa-miR-106a   | 1                     | MI0000113 | hsa-mir-106a   |              |
| 17854    | hsa-miR-106b*  | 1                     | MI0000734 | hsa-mir-106b   |              |
| 19582    | hsa-miR-106b   | 1                     | MI0000734 | hsa-mir-106b   |              |



|       |                 |   |           |                |
|-------|-----------------|---|-----------|----------------|
| 10923 | hsa-miR-107     | 1 | MI0000114 | hsa-mir-107    |
| 13485 | hsa-miR-10a     | 1 | MI0000266 | hsa-mir-10a    |
| 28019 | hsa-miR-10a*    | 1 | MI0000266 | hsa-mir-10a    |
| 42969 | hsa-miR-10b*    | 1 | MI0000267 | hsa-mir-10b    |
| 10925 | hsa-miR-10b     | 1 | MI0000267 | hsa-mir-10b    |
| 46822 | hsa-miR-1178    | 1 | MI0006271 | hsa-mir-1178   |
| 46735 | hsa-miR-1179    | 1 | MI0006272 | hsa-mir-1179   |
| 42848 | hsa-miR-1180    | 1 | MI0006273 | hsa-mir-1180   |
| 46675 | hsa-miR-1181    | 1 | MI0006274 | hsa-mir-1181   |
| 46738 | hsa-miR-1182    | 1 | MI0006275 | hsa-mir-1182   |
| 46880 | hsa-miR-1183    | 1 | MI0006276 | hsa-mir-1183   |
| 46258 | hsa-miR-1184    | 3 | MI0006277 | hsa-mir-1184-1 |
| 46258 | hsa-miR-1184    | 3 | MI0015971 | hsa-mir-1184-2 |
| 46258 | hsa-miR-1184    | 3 | MI0015972 | hsa-mir-1184-3 |
| 46419 | hsa-miR-1185    | 2 | MI0003844 | hsa-mir-1185-1 |
| 46419 | hsa-miR-1185    | 2 | MI0003821 | hsa-mir-1185-2 |
| 46617 | hsa-miR-1197    | 1 | MI0006656 | hsa-mir-1197   |
| 46272 | hsa-miR-1200    | 1 | MI0006332 | hsa-mir-1200   |
| 46832 | hsa-miR-1202    | 1 | MI0006334 | hsa-mir-1202   |
| 46411 | hsa-miR-1203    | 1 | MI0006335 | hsa-mir-1203   |
| 46791 | hsa-miR-1204    | 1 | MI0006337 | hsa-mir-1204   |
| 46860 | hsa-miR-1205    | 1 | MI0006338 | hsa-mir-1205   |
| 46779 | hsa-miR-1206    | 1 | MI0006339 | hsa-mir-1206   |
| 46345 | hsa-miR-1207-3p | 1 | MI0006340 | hsa-mir-1207   |
| 46565 | hsa-miR-1207-5p | 1 | MI0006340 | hsa-mir-1207   |
| 46766 | hsa-miR-1208    | 1 | MI0006341 | hsa-mir-1208   |
| 19583 | hsa-miR-122     | 1 | MI0000442 | hsa-mir-122    |
| 42551 | hsa-miR-122*    | 1 | MI0000442 | hsa-mir-122    |
| 46462 | hsa-miR-1224-5p | 1 | MI0003764 | hsa-mir-1224   |
| 46800 | hsa-miR-1224-3p | 1 | MI0003764 | hsa-mir-1224   |
| 46541 | hsa-miR-1225-5p | 1 | MI0006311 | hsa-mir-1225   |
| 46684 | hsa-miR-1225-3p | 1 | MI0006311 | hsa-mir-1225   |
| 46309 | hsa-miR-1226    | 1 | MI0006313 | hsa-mir-1226   |
| 46246 | hsa-miR-1226*   | 1 | MI0006313 | hsa-mir-1226   |
| 46806 | hsa-miR-1227    | 1 | MI0006316 | hsa-mir-1227   |
| 46222 | hsa-miR-1228*   | 1 | MI0006318 | hsa-mir-1228   |
| 46695 | hsa-miR-1228    | 1 | MI0006318 | hsa-mir-1228   |
| 46689 | hsa-miR-1229    | 1 | MI0006319 | hsa-mir-1229   |
| 46531 | hsa-miR-1231    | 1 | MI0006321 | hsa-mir-1231   |
| 46326 | hsa-miR-1233    | 2 | MI0006323 | hsa-mir-1233-1 |
| 46326 | hsa-miR-1233    | 2 | MI0015973 | hsa-mir-1233-2 |
| 46696 | hsa-miR-1234    | 1 | MI0006324 | hsa-mir-1234   |
| 46624 | hsa-miR-1236    | 1 | MI0006326 | hsa-mir-1236   |
| 46850 | hsa-miR-1237    | 1 | MI0006327 | hsa-mir-1237   |
| 46690 | hsa-miR-1238    | 1 | MI0006328 | hsa-mir-1238   |
| 14328 | hsa-miR-124     | 3 | MI0000443 | hsa-mir-124-1  |
| 42898 | hsa-miR-124*    | 3 | MI0000443 | hsa-mir-124-1  |
| 14328 | hsa-miR-124     | 3 | MI0000444 | hsa-mir-124-2  |
| 42898 | hsa-miR-124*    | 3 | MI0000444 | hsa-mir-124-2  |
| 14328 | hsa-miR-124     | 3 | MI0000445 | hsa-mir-124-3  |
| 42898 | hsa-miR-124*    | 3 | MI0000445 | hsa-mir-124-3  |
| 46439 | hsa-miR-1243    | 1 | MI0006373 | hsa-mir-1243   |

|        |                 |   |           |                 |
|--------|-----------------|---|-----------|-----------------|
| 46404  | hsa-miR-1244    | 3 | MI0006379 | hsa-mir-1244-1  |
| 46404  | hsa-miR-1244    | 3 | MI0015974 | hsa-mir-1244-2  |
| 46404  | hsa-miR-1244    | 3 | MI0015975 | hsa-mir-1244-3  |
| 46321  | hsa-miR-1245    | 1 | MI0006380 | hsa-mir-1245    |
| 46514  | hsa-miR-1246    | 1 | MI0006381 | hsa-mir-1246    |
| 145977 | hsa-miR-1247    | 1 | MI0006382 | hsa-mir-1247    |
| 46427  | hsa-miR-1248    | 1 | MI0006383 | hsa-mir-1248    |
| 46210  | hsa-miR-1249    | 1 | MI0006384 | hsa-mir-1249    |
| 46214  | hsa-miR-1250    | 1 | MI0006385 | hsa-mir-1250    |
| 46275  | hsa-miR-1251    | 1 | MI0006386 | hsa-mir-1251    |
| 46924  | hsa-miR-1252    | 1 | MI0006434 | hsa-mir-1252    |
| 46707  | hsa-miR-1253    | 1 | MI0006387 | hsa-mir-1253    |
| 46750  | hsa-miR-1254    | 2 | MI0006388 | hsa-mir-1254    |
| 46750  | hsa-miR-1254    | 2 | MI0016747 | hsa-mir-1254-2  |
| 46380  | hsa-miR-1255a   | 1 | MI0006389 | hsa-mir-1255a   |
| 46402  | hsa-miR-1255b   | 2 | MI0006435 | hsa-mir-1255b-1 |
| 46402  | hsa-miR-1255b   | 2 | MI0006436 | hsa-mir-1255b-2 |
| 46717  | hsa-miR-1256    | 1 | MI0006390 | hsa-mir-1256    |
| 46640  | hsa-miR-1257    | 1 | MI0006391 | hsa-mir-1257    |
| 46869  | hsa-miR-1258    | 1 | MI0006392 | hsa-mir-1258    |
| 10928  | hsa-miR-125a-5p | 1 | MI0000469 | hsa-mir-125a    |
| 17942  | hsa-miR-125a-3p | 1 | MI0000469 | hsa-mir-125a    |
| 30787  | hsa-miR-125b    | 2 | MI0000446 | hsa-mir-125b-1  |
| 145838 | hsa-miR-125b-1* | 1 | MI0000446 | hsa-mir-125b-1  |
| 30787  | hsa-miR-125b    | 2 | MI0000470 | hsa-mir-125b-2  |
| 42845  | hsa-miR-125b-2* | 1 | MI0000470 | hsa-mir-125b-2  |
| 4610   | hsa-miR-126     | 1 | MI0000471 | hsa-mir-126     |
| 33596  | hsa-miR-126*    | 1 | MI0000471 | hsa-mir-126     |
| 145975 | hsa-miR-1260    | 1 | MI0006394 | hsa-mir-1260    |
| 46248  | hsa-miR-1261    | 1 | MI0006396 | hsa-mir-1261    |
| 46872  | hsa-miR-1262    | 1 | MI0006397 | hsa-mir-1262    |
| 46747  | hsa-miR-1263    | 1 | MI0006398 | hsa-mir-1263    |
| 46732  | hsa-miR-1264    | 1 | MI0003758 | hsa-mir-1264    |
| 46737  | hsa-miR-1265    | 1 | MI0006401 | hsa-mir-1265    |
| 46517  | hsa-miR-1266    | 1 | MI0006403 | hsa-mir-1266    |
| 46633  | hsa-miR-1267    | 1 | MI0006404 | hsa-mir-1267    |
| 46558  | hsa-miR-1268    | 2 | MI0006405 | hsa-mir-1268    |
| 46558  | hsa-miR-1268    | 2 | MI0016748 | hsa-mir-1268b   |
| 46746  | hsa-miR-1269    | 1 | MI0006406 | hsa-mir-1269    |
| 42692  | hsa-miR-127-5p  | 1 | MI0000472 | hsa-mir-127     |
| 42829  | hsa-miR-127-3p  | 1 | MI0000472 | hsa-mir-127     |
| 46752  | hsa-miR-1270    | 2 | MI0006407 | hsa-mir-1270-1  |
| 46752  | hsa-miR-1270    | 2 | MI0015976 | hsa-mir-1270-2  |
| 46627  | hsa-miR-1271    | 1 | MI0003814 | hsa-mir-1271    |
| 46363  | hsa-miR-1272    | 1 | MI0006408 | hsa-mir-1272    |
| 46623  | hsa-miR-1273    | 1 | MI0006409 | hsa-mir-1273    |
| 46620  | hsa-miR-1275    | 1 | MI0006415 | hsa-mir-1275    |
| 46642  | hsa-miR-1276    | 1 | MI0006416 | hsa-mir-1276    |
| 46925  | hsa-miR-1277    | 1 | MI0006419 | hsa-mir-1277    |
| 46361  | hsa-miR-1278    | 1 | MI0006425 | hsa-mir-1278    |
| 45775  | hsa-miR-1279    | 1 | MI0006426 | hsa-mir-1279    |
| 33902  | hsa-miR-128     | 2 | MI0000447 | hsa-mir-128-1   |

|        |                   |    |           |                 |
|--------|-------------------|----|-----------|-----------------|
| 33902  | hsa-miR-128       | 2  | MI0000727 | hsa-mir-128-2   |
| 46698  | hsa-miR-1280      | 1  | MI0006437 | hsa-mir-1280    |
| 46634  | hsa-miR-1281      | 1  | MI0006428 | hsa-mir-1281    |
| 46368  | hsa-miR-1282      | 1  | MI0006429 | hsa-mir-1282    |
| 46367  | hsa-miR-1283      | 2  | MI0003832 | hsa-mir-1283-1  |
| 46367  | hsa-miR-1283      | 2  | MI0006430 | hsa-mir-1283-2  |
| 46533  | hsa-miRPlus-F1056 | 1  | MI0006430 | hsa-mir-1283-2  |
| 46336  | hsa-miR-1284      | 1  | MI0006431 | hsa-mir-1284    |
| 145981 | hsa-miR-1285      | 2  | MI0006346 | hsa-mir-1285-1  |
| 145981 | hsa-miR-1285      | 2  | MI0006347 | hsa-mir-1285-2  |
| 46295  | hsa-miR-1286      | 1  | MI0006348 | hsa-mir-1286    |
| 46440  | hsa-miR-1287      | 1  | MI0006349 | hsa-mir-1287    |
| 46606  | hsa-miR-1288      | 1  | MI0006432 | hsa-mir-1288    |
| 46340  | hsa-miR-1289      | 2  | MI0006350 | hsa-mir-1289-1  |
| 46340  | hsa-miR-1289      | 2  | MI0006351 | hsa-mir-1289-2  |
| 42467  | hsa-miR-129-5p    | 2  | MI0000252 | hsa-mir-129-1   |
| 42571  | hsa-miR-129*      | 1  | MI0000252 | hsa-mir-129-1   |
| 42467  | hsa-miR-129-5p    | 2  | MI0000473 | hsa-mir-129-2   |
| 145970 | hsa-miR-129-3p    | 1  | MI0000473 | hsa-mir-129-2   |
| 46921  | hsa-miR-1290      | 1  | MI0006352 | hsa-mir-1290    |
| 46281  | hsa-miR-1291      | 1  | MI0006353 | hsa-mir-1291    |
| 45936  | hsa-miR-1292      | 1  | MI0006433 | hsa-mir-1292    |
| 46416  | hsa-miR-1293      | 1  | MI0006355 | hsa-mir-1293    |
| 46661  | hsa-miR-1294      | 1  | MI0006356 | hsa-mir-1294    |
| 46645  | hsa-miRPlus-F1242 | 1  | MI0006356 | hsa-mir-1294    |
| 46741  | hsa-miR-1295      | 1  | MI0006357 | hsa-mir-1295    |
| 42710  | hsa-miR-1296      | 1  | MI0003780 | hsa-mir-1296    |
| 46944  | hsa-miR-1297      | 1  | MI0006358 | hsa-mir-1297    |
| 46381  | hsa-miR-1298      | 1  | MI0003938 | hsa-mir-1298    |
| 46788  | hsa-miR-1299      | 1  | MI0006359 | hsa-mir-1299    |
| 46215  | hsa-miR-1301      | 1  | MI0003815 | hsa-mir-1301    |
| 46796  | hsa-miR-1302      | 11 | MI0006362 | hsa-mir-1302-1  |
| 46796  | hsa-miR-1302      | 11 | MI0015979 | hsa-mir-1302-10 |
| 46796  | hsa-miR-1302      | 11 | MI0015980 | hsa-mir-1302-11 |
| 46796  | hsa-miR-1302      | 11 | MI0006363 | hsa-mir-1302-2  |
| 46796  | hsa-miR-1302      | 11 | MI0006364 | hsa-mir-1302-3  |
| 46796  | hsa-miR-1302      | 11 | MI0006365 | hsa-mir-1302-4  |
| 46796  | hsa-miR-1302      | 11 | MI0006366 | hsa-mir-1302-5  |
| 46796  | hsa-miR-1302      | 11 | MI0006367 | hsa-mir-1302-6  |
| 46796  | hsa-miR-1302      | 11 | MI0006368 | hsa-mir-1302-7  |
| 46796  | hsa-miR-1302      | 11 | MI0006369 | hsa-mir-1302-8  |
| 46796  | hsa-miR-1302      | 11 | MI0015978 | hsa-mir-1302-9  |
| 46625  | hsa-miR-1303      | 1  | MI0006370 | hsa-mir-1303    |
| 46479  | hsa-miR-1304      | 1  | MI0006371 | hsa-mir-1304    |
| 46501  | hsa-miR-1305      | 1  | MI0006372 | hsa-mir-1305    |
| 46219  | hsa-miRPlus-F1185 | 1  | MI0006443 | hsa-mir-1306    |
| 46223  | hsa-miR-1306      | 1  | MI0006443 | hsa-mir-1306    |
| 42681  | hsa-miR-1307      | 1  | MI0006444 | hsa-mir-1307    |
| 42780  | hsa-miRPlus-A1065 | 1  | MI0006444 | hsa-mir-1307    |
| 10138  | hsa-miR-130a      | 1  | MI0000448 | hsa-mir-130a    |
| 42718  | hsa-miR-130a*     | 1  | MI0000448 | hsa-mir-130a    |
| 42787  | hsa-miR-130b*     | 1  | MI0000748 | hsa-mir-130b    |

|        |                   |   |           |                |
|--------|-------------------|---|-----------|----------------|
| 10936  | hsa-miR-130b      | 1 | MI0000748 | hsa-mir-130b   |
| 10937  | hsa-miR-132       | 1 | MI0000449 | hsa-mir-132    |
| 145634 | hsa-miR-132*      | 1 | MI0000449 | hsa-mir-132    |
| 46866  | hsa-miR-1321      | 1 | MI0006652 | hsa-mir-1321   |
| 46408  | hsa-miR-1322      | 2 | MI0006653 | hsa-mir-1322   |
| 46614  | hsa-miR-1323      | 1 | MI0003786 | hsa-mir-1323   |
| 46647  | hsa-miR-1324      | 1 | MI0006657 | hsa-mir-1324   |
| 32809  | blank             | 2 | MI0000450 | hsa-mir-133a-1 |
| 146137 | hsa-miR-133a      | 2 | MI0000450 | hsa-mir-133a-1 |
| 17653  | hsa-miRPlus-C1049 | 2 | MI0000450 | hsa-mir-133a-1 |
| 32809  | blank             | 2 | MI0000451 | hsa-mir-133a-2 |
| 146137 | hsa-miR-133a      | 2 | MI0000451 | hsa-mir-133a-2 |
| 17653  | hsa-miRPlus-C1049 | 2 | MI0000451 | hsa-mir-133a-2 |
| 146160 | hsa-miR-133b      | 1 | MI0000822 | hsa-mir-133b   |
| 42942  | hsa-miR-134       | 1 | MI0000474 | hsa-mir-134    |
| 145679 | blank             | 2 | MI0000452 | hsa-mir-135a-1 |
| 42839  | hsa-miR-135a      | 2 | MI0000452 | hsa-mir-135a-1 |
| 42609  | hsa-miR-135a*     | 1 | MI0000452 | hsa-mir-135a-1 |
| 145679 | blank             | 2 | MI0000453 | hsa-mir-135a-2 |
| 42839  | hsa-miR-135a      | 2 | MI0000453 | hsa-mir-135a-2 |
| 46859  | blank             | 1 | MI0000453 | hsa-mir-135a-2 |
| 10942  | blank             | 1 | MI0000810 | hsa-mir-135b   |
| 42615  | hsa-miR-135b*     | 1 | MI0000810 | hsa-mir-135b   |
| 145914 | hsa-miR-135b      | 1 | MI0000810 | hsa-mir-135b   |
| 42512  | hsa-miR-136*      | 1 | MI0000475 | hsa-mir-136    |
| 145760 | hsa-miR-136       | 1 | MI0000475 | hsa-mir-136    |
| 42686  | blank             | 1 | MI0000475 | hsa-mir-136    |
| 10943  | blank             | 1 | MI0000475 | hsa-mir-136    |
| 10944  | blank             | 1 | MI0000454 | hsa-mir-137    |
| 145749 | hsa-miR-137       | 1 | MI0000454 | hsa-mir-137    |
| 13140  | hsa-miR-138       | 2 | MI0000476 | hsa-mir-138-1  |
| 42872  | hsa-miR-138-1*    | 1 | MI0000476 | hsa-mir-138-1  |
| 13140  | hsa-miR-138       | 2 | MI0000455 | hsa-mir-138-2  |
| 42454  | hsa-miR-138-2*    | 1 | MI0000455 | hsa-mir-138-2  |
| 42451  | hsa-miR-139-3p    | 1 | MI0000261 | hsa-mir-139    |
| 145677 | hsa-miR-139-5p    | 1 | MI0000261 | hsa-mir-139    |
| 4700   | hsa-miR-140-5p    | 1 | MI0000456 | hsa-mir-140    |
| 42630  | hsa-miR-140-3p    | 1 | MI0000456 | hsa-mir-140    |
| 10946  | hsa-miR-141       | 1 | MI0000457 | hsa-mir-141    |
| 145972 | hsa-miR-141*      | 1 | MI0000457 | hsa-mir-141    |
| 10947  | hsa-miR-142-3p    | 1 | MI0000458 | hsa-mir-142    |
| 145798 | hsa-miR-142-5p    | 1 | MI0000458 | hsa-mir-142    |
| 13177  | hsa-miR-143       | 1 | MI0000459 | hsa-mir-143    |
| 46467  | hsa-miR-143*      | 1 | MI0000459 | hsa-mir-143    |
| 42660  | hsa-miR-144*      | 1 | MI0000460 | hsa-mir-144    |
| 29802  | hsa-miR-144       | 1 | MI0000460 | hsa-mir-144    |
| 31867  | hsa-miR-145*      | 1 | MI0000461 | hsa-mir-145    |
| 42641  | hsa-miR-145       | 1 | MI0000461 | hsa-mir-145    |
| 46584  | hsa-miR-1468      | 1 | MI0003782 | hsa-mir-1468   |
| 146072 | hsa-miR-1469      | 1 | MI0007074 | hsa-mir-1469   |
| 145755 | hsa-miR-146a*     | 1 | MI0000477 | hsa-mir-146a   |
| 10952  | hsa-miR-146a      | 1 | MI0000477 | hsa-mir-146a   |

|        |                   |   |           |                |
|--------|-------------------|---|-----------|----------------|
| 10306  | hsa-miR-146b-5p   | 1 | MI0003129 | hsa-mir-146b   |
| 42461  | hsa-miR-146b-3p   | 1 | MI0003129 | hsa-mir-146b   |
| 10954  | hsa-miR-147       | 1 | MI0000262 | hsa-mir-147    |
| 146121 | hsa-miR-1470      | 1 | MI0007075 | hsa-mir-1470   |
| 146052 | hsa-miR-1471      | 1 | MI0007076 | hsa-mir-1471   |
| 17411  | hsa-miR-147b      | 1 | MI0005544 | hsa-mir-147b   |
| 10955  | hsa-miR-148a      | 1 | MI0000253 | hsa-mir-148a   |
| 17872  | hsa-miR-148a*     | 1 | MI0000253 | hsa-mir-148a   |
| 42736  | hsa-miR-148b*     | 1 | MI0000811 | hsa-mir-148b   |
| 30908  | blank             | 1 | MI0000811 | hsa-mir-148b   |
| 19585  | hsa-miR-148b      | 1 | MI0000811 | hsa-mir-148b   |
| 42810  | hsa-miR-149       | 1 | MI0000478 | hsa-mir-149    |
| 42486  | hsa-miR-149*      | 1 | MI0000478 | hsa-mir-149    |
| 42802  | blank             | 1 | MI0000479 | hsa-mir-150    |
| 145678 | hsa-miR-150       | 1 | MI0000479 | hsa-mir-150    |
| 42850  | hsa-miR-150*      | 1 | MI0000479 | hsa-mir-150    |
| 11260  | hsa-miR-151-5p    | 1 | MI0000809 | hsa-mir-151    |
| 17463  | hsa-miR-151-3p    | 1 | MI0000809 | hsa-mir-151    |
| 17676  | hsa-miR-152       | 1 | MI0000462 | hsa-mir-152    |
| 42599  | hsa-miR-153       | 2 | MI0000463 | hsa-mir-153-1  |
| 42599  | hsa-miR-153       | 2 | MI0000464 | hsa-mir-153-2  |
| 17880  | hsa-miRPlus-C1057 | 1 | MI0000464 | hsa-mir-153-2  |
| 46515  | hsa-miR-1537      | 1 | MI0007258 | hsa-mir-1537   |
| 146114 | hsa-miR-1538      | 1 | MI0007259 | hsa-mir-1538   |
| 146105 | hsa-miR-1539      | 1 | MI0007260 | hsa-mir-1539   |
| 46616  | blank             | 1 | MI0000480 | hsa-mir-154    |
| 42572  | hsa-miR-154*      | 1 | MI0000480 | hsa-mir-154    |
| 145857 | hsa-miR-154       | 1 | MI0000480 | hsa-mir-154    |
| 42949  | hsa-miR-155*      | 1 | MI0000681 | hsa-mir-155    |
| 10964  | hsa-miR-155       | 1 | MI0000681 | hsa-mir-155    |
| 42789  | hsa-miR-15a*      | 1 | MI0000069 | hsa-mir-15a    |
| 27720  | hsa-miR-15a       | 1 | MI0000069 | hsa-mir-15a    |
| 17902  | hsa-miR-15b*      | 1 | MI0000438 | hsa-mir-15b    |
| 17280  | hsa-miR-15b       | 1 | MI0000438 | hsa-mir-15b    |
| 10967  | hsa-miR-16        | 2 | MI0000070 | hsa-mir-16-1   |
| 17936  | hsa-miR-16-1*     | 1 | MI0000070 | hsa-mir-16-1   |
| 10967  | hsa-miR-16        | 2 | MI0000115 | hsa-mir-16-2   |
| 42874  | hsa-miR-16-2*     | 1 | MI0000115 | hsa-mir-16-2   |
| 42650  | hsa-miR-17        | 1 | MI0000071 | hsa-mir-17     |
| 19588  | hsa-miR-17*       | 1 | MI0000071 | hsa-mir-17     |
| 46777  | blank             | 1 | MI0000071 | hsa-mir-17     |
| 42865  | hsa-miR-181a      | 2 | MI0000289 | hsa-mir-181a-1 |
| 11013  | hsa-miR-181a*     | 1 | MI0000289 | hsa-mir-181a-1 |
| 42865  | hsa-miR-181a      | 2 | MI0000269 | hsa-mir-181a-2 |
| 17928  | hsa-miR-181a-2*   | 1 | MI0000269 | hsa-mir-181a-2 |
| 10972  | hsa-miR-181b      | 2 | MI0000270 | hsa-mir-181b-1 |
| 10972  | hsa-miR-181b      | 2 | MI0000683 | hsa-mir-181b-2 |
| 145759 | hsa-miR-181c*     | 1 | MI0000271 | hsa-mir-181c   |
| 42496  | hsa-miR-181c      | 1 | MI0000271 | hsa-mir-181c   |
| 145636 | hsa-miR-181d      | 1 | MI0003139 | hsa-mir-181d   |
| 10976  | hsa-miR-182*      | 1 | MI0000272 | hsa-mir-182    |
| 10975  | hsa-miR-182       | 1 | MI0000272 | hsa-mir-182    |

|        |                   |   |           |                |
|--------|-------------------|---|-----------|----------------|
| 46266  | hsa-miR-1825      | 1 | MI0008193 | hsa-mir-1825   |
| 46810  | hsa-miR-1827      | 1 | MI0008195 | hsa-mir-1827   |
| 17953  | hsa-miR-183*      | 1 | MI0000273 | hsa-mir-183    |
| 10977  | hsa-miR-183       | 1 | MI0000273 | hsa-mir-183    |
| 145801 | hsa-miR-184       | 1 | MI0000481 | hsa-mir-184    |
| 17904  | hsa-miR-185*      | 1 | MI0000482 | hsa-mir-185    |
| 42902  | hsa-miR-185       | 1 | MI0000482 | hsa-mir-185    |
| 18739  | hsa-miR-186       | 1 | MI0000483 | hsa-mir-186    |
| 42614  | hsa-miR-186*      | 1 | MI0000483 | hsa-mir-186    |
| 42775  | hsa-miR-187*      | 1 | MI0000274 | hsa-mir-187    |
| 145637 | hsa-miR-187       | 1 | MI0000274 | hsa-mir-187    |
| 42620  | hsa-miR-188-5p    | 1 | MI0000484 | hsa-mir-188    |
| 42786  | hsa-miR-188-3p    | 1 | MI0000484 | hsa-mir-188    |
| 42588  | hsa-miR-18a       | 1 | MI0000072 | hsa-mir-18a    |
| 13178  | hsa-miR-18a*      | 1 | MI0000072 | hsa-mir-18a    |
| 13141  | blank             | 1 | MI0001518 | hsa-mir-18b    |
| 42644  | blank             | 1 | MI0001518 | hsa-mir-18b    |
| 145878 | hsa-miR-18b       | 1 | MI0001518 | hsa-mir-18b    |
| 145826 | hsa-miR-18b*      | 1 | MI0001518 | hsa-mir-18b    |
| 27536  | hsa-miR-190       | 1 | MI0000486 | hsa-mir-190    |
| 28431  | hsa-miR-1908      | 1 | MI0008329 | hsa-mir-1908   |
| 146138 | hsa-miR-1909*     | 1 | MI0008330 | hsa-mir-1909   |
| 146180 | hsa-miR-1909      | 1 | MI0008330 | hsa-mir-1909   |
| 32731  | hsa-miR-190b      | 1 | MI0005545 | hsa-mir-190b   |
| 10985  | hsa-miR-191       | 1 | MI0000465 | hsa-mir-191    |
| 42705  | hsa-miR-191*      | 1 | MI0000465 | hsa-mir-191    |
| 146109 | hsa-miR-1910      | 1 | MI0008331 | hsa-mir-1910   |
| 146000 | hsa-miR-1911      | 1 | MI0008332 | hsa-mir-1911   |
| 146094 | hsa-miR-1911*     | 1 | MI0008332 | hsa-mir-1911   |
| 146168 | hsa-miR-1912      | 1 | MI0008333 | hsa-mir-1912   |
| 146103 | hsa-miR-1913      | 1 | MI0008334 | hsa-mir-1913   |
| 146061 | hsa-miR-1914*     | 1 | MI0008335 | hsa-mir-1914   |
| 146091 | hsa-miR-1914      | 1 | MI0008335 | hsa-mir-1914   |
| 146069 | hsa-miR-1915*     | 1 | MI0008336 | hsa-mir-1915   |
| 146068 | hsa-miR-1915      | 1 | MI0008336 | hsa-mir-1915   |
| 17946  | hsa-miR-192*      | 1 | MI0000234 | hsa-mir-192    |
| 17732  | hsa-miR-192       | 1 | MI0000234 | hsa-mir-192    |
| 10986  | hsa-miR-193a-3p   | 1 | MI0000487 | hsa-mir-193a   |
| 46443  | hsa-miR-193a-5p   | 1 | MI0000487 | hsa-mir-193a   |
| 42962  | hsa-miR-193b*     | 1 | MI0003137 | hsa-mir-193b   |
| 145895 | blank             | 1 | MI0003137 | hsa-mir-193b   |
| 10987  | hsa-miR-193b      | 1 | MI0003137 | hsa-mir-193b   |
| 10988  | hsa-miR-194       | 2 | MI0000488 | hsa-mir-194-1  |
| 17820  | hsa-miRPlus-C1066 | 1 | MI0000488 | hsa-mir-194-1  |
| 10988  | hsa-miR-194       | 2 | MI0000732 | hsa-mir-194-2  |
| 42570  | hsa-miR-194*      | 1 | MI0000732 | hsa-mir-194-2  |
| 42723  | hsa-miR-195*      | 1 | MI0000489 | hsa-mir-195    |
| 13148  | hsa-miR-195       | 1 | MI0000489 | hsa-mir-195    |
| 10990  | hsa-miR-196a      | 2 | MI0000238 | hsa-mir-196a-1 |
| 10990  | hsa-miR-196a      | 2 | MI0000279 | hsa-mir-196a-2 |
| 42538  | hsa-miR-196a*     | 1 | MI0000279 | hsa-mir-196a-2 |
| 10991  | blank             | 1 | MI0001150 | hsa-mir-196b   |

|        |                    |   |           |                |
|--------|--------------------|---|-----------|----------------|
| 145889 | hsa-miR-196b       | 1 | MI0001150 | hsa-mir-196b   |
| 145995 | hsa-miR-196b*      | 1 | MI0001150 | hsa-mir-196b   |
| 42783  | hsa-miR-197        | 1 | MI0000239 | hsa-mir-197    |
| 146142 | hsa-miR-1972       | 2 | MI0009982 | hsa-mir-1972-1 |
| 146142 | hsa-miR-1972       | 2 | MI0015977 | hsa-mir-1972-2 |
| 146165 | hsa-miR-1973       | 1 | MI0009983 | hsa-mir-1973   |
| 146140 | hsa-miR-1976       | 1 | MI0009986 | hsa-mir-1976   |
| 27540  | hsa-miR-198        | 1 | MI0000240 | hsa-mir-198    |
| 10995  | hsa-miR-199a-3p/h: | 3 | MI0000242 | hsa-mir-199a-1 |
| 29562  | hsa-miR-199a-5p    | 2 | MI0000242 | hsa-mir-199a-1 |
| 10995  | hsa-miR-199a-3p/h: | 3 | MI0000281 | hsa-mir-199a-2 |
| 29562  | hsa-miR-199a-5p    | 2 | MI0000281 | hsa-mir-199a-2 |
| 10995  | hsa-miR-199a-3p/h: | 3 | MI0000282 | hsa-mir-199b   |
| 19591  | hsa-miR-199b-5p    | 1 | MI0000282 | hsa-mir-199b   |
| 10997  | hsa-miR-19a        | 1 | MI0000073 | hsa-mir-19a    |
| 42549  | hsa-miR-19a*       | 1 | MI0000073 | hsa-mir-19a    |
| 10998  | hsa-miR-19b        | 2 | MI0000074 | hsa-mir-19b-1  |
| 17883  | hsa-miR-19b-1*     | 1 | MI0000074 | hsa-mir-19b-1  |
| 10998  | hsa-miR-19b        | 2 | MI0000075 | hsa-mir-19b-2  |
| 42918  | hsa-miR-19b-2*     | 1 | MI0000075 | hsa-mir-19b-2  |
| 11000  | hsa-miR-200a       | 1 | MI0000737 | hsa-mir-200a   |
| 145827 | hsa-miR-200a*      | 1 | MI0000737 | hsa-mir-200a   |
| 145953 | hsa-miR-200b       | 1 | MI0000342 | hsa-mir-200b   |
| 145974 | hsa-miR-200b*      | 1 | MI0000342 | hsa-mir-200b   |
| 17427  | hsa-miR-200c       | 1 | MI0000650 | hsa-mir-200c   |
| 17851  | hsa-miR-200c*      | 1 | MI0000650 | hsa-mir-200c   |
| 42590  | hsa-miR-202*       | 1 | MI0003130 | hsa-mir-202    |
| 42507  | blank              | 1 | MI0003130 | hsa-mir-202    |
| 42968  | hsa-miR-202        | 1 | MI0003130 | hsa-mir-202    |
| 17957  | hsa-miRPlus-C1070  | 1 | MI0000283 | hsa-mir-203    |
| 11004  | hsa-miR-203        | 1 | MI0000283 | hsa-mir-203    |
| 11005  | hsa-miR-204        | 1 | MI0000284 | hsa-mir-204    |
| 42502  | blank              | 1 | MI0000284 | hsa-mir-204    |
| 46917  | hsa-miR-205        | 1 | MI0000285 | hsa-mir-205    |
| 145996 | hsa-miR-205*       | 1 | MI0000285 | hsa-mir-205    |
| 145986 | hsa-miR-2052       | 1 | MI0010486 | hsa-mir-2052   |
| 146122 | hsa-miR-2053       | 1 | MI0010487 | hsa-mir-2053   |
| 145987 | hsa-miR-2054       | 1 | MI0010488 | hsa-mir-2054   |
| 11007  | hsa-miR-206        | 1 | MI0000490 | hsa-mir-206    |
| 5730   | hsa-miR-208a       | 1 | MI0000251 | hsa-mir-208a   |
| 42555  | hsa-miR-208b       | 1 | MI0005570 | hsa-mir-208b   |
| 42663  | hsa-miR-20a*       | 1 | MI0000076 | hsa-mir-20a    |
| 145845 | hsa-miR-20a        | 1 | MI0000076 | hsa-mir-20a    |
| 42640  | blank              | 1 | MI0001519 | hsa-mir-20b    |
| 17882  | hsa-miR-20b*       | 1 | MI0001519 | hsa-mir-20b    |
| 42860  | blank              | 1 | MI0001519 | hsa-mir-20b    |
| 145915 | hsa-miR-20b        | 1 | MI0001519 | hsa-mir-20b    |
| 17896  | blank              | 1 | MI0000077 | hsa-mir-21     |
| 42524  | hsa-miR-21*        | 1 | MI0000077 | hsa-mir-21     |
| 5740   | hsa-miR-21         | 1 | MI0000077 | hsa-mir-21     |
| 145917 | blank              | 1 | MI0000077 | hsa-mir-21     |
| 145852 | hsa-miR-210        | 1 | MI0000286 | hsa-mir-210    |

|        |                   |   |           |               |
|--------|-------------------|---|-----------|---------------|
| 11011  | hsa-miR-211       | 1 | MI0000287 | hsa-mir-211   |
| 42734  | hsa-miR-2110      | 1 | MI0010629 | hsa-mir-2110  |
| 146179 | hsa-miR-2113      | 1 | MI0003939 | hsa-mir-2113  |
| 146074 | hsa-miR-2114      | 1 | MI0010633 | hsa-mir-2114  |
| 146173 | hsa-miR-2114*     | 1 | MI0010633 | hsa-mir-2114  |
| 146161 | hsa-miR-2115*     | 1 | MI0010634 | hsa-mir-2115  |
| 146044 | hsa-miR-2115      | 1 | MI0010634 | hsa-mir-2115  |
| 146116 | hsa-miR-2116*     | 1 | MI0010635 | hsa-mir-2116  |
| 146010 | hsa-miR-2116      | 1 | MI0010635 | hsa-mir-2116  |
| 146131 | hsa-miR-2117      | 1 | MI0010636 | hsa-mir-2117  |
| 42627  | hsa-miR-212       | 1 | MI0000288 | hsa-mir-212   |
| 145822 | hsa-miR-214*      | 1 | MI0000290 | hsa-mir-214   |
| 11014  | hsa-miR-214       | 1 | MI0000290 | hsa-mir-214   |
| 11015  | hsa-miR-215       | 1 | MI0000291 | hsa-mir-215   |
| 42553  | hsa-miR-216a      | 1 | MI0000292 | hsa-mir-216a  |
| 145707 | hsa-miR-216b      | 1 | MI0005569 | hsa-mir-216b  |
| 19016  | hsa-miR-217       | 1 | MI0000293 | hsa-mir-217   |
| 11018  | hsa-miR-218       | 2 | MI0000294 | hsa-mir-218-1 |
| 42941  | hsa-miR-218-1*    | 1 | MI0000294 | hsa-mir-218-1 |
| 42931  | blank             | 1 | MI0000294 | hsa-mir-218-1 |
| 11018  | hsa-miR-218       | 2 | MI0000295 | hsa-mir-218-2 |
| 145836 | hsa-miR-218-2*    | 1 | MI0000295 | hsa-mir-218-2 |
| 42509  | hsa-miR-219-5p    | 2 | MI0000296 | hsa-mir-219-1 |
| 21702  | hsa-miR-219-1-3p  | 1 | MI0000296 | hsa-mir-219-1 |
| 42509  | hsa-miR-219-5p    | 2 | MI0000740 | hsa-mir-219-2 |
| 42834  | hsa-miR-219-2-3p  | 1 | MI0000740 | hsa-mir-219-2 |
| 11020  | hsa-miR-22        | 1 | MI0000078 | hsa-mir-22    |
| 42532  | hsa-miR-22*       | 1 | MI0000078 | hsa-mir-22    |
| 11022  | hsa-miR-221       | 1 | MI0000298 | hsa-mir-221   |
| 42475  | hsa-miR-221*      | 1 | MI0000298 | hsa-mir-221   |
| 11023  | hsa-miR-222       | 1 | MI0000299 | hsa-mir-222   |
| 17918  | hsa-miR-222*      | 1 | MI0000299 | hsa-mir-222   |
| 42460  | hsa-miR-223*      | 1 | MI0000300 | hsa-mir-223   |
| 11024  | hsa-miR-223       | 1 | MI0000300 | hsa-mir-223   |
| 42566  | hsa-miR-224       | 1 | MI0000301 | hsa-mir-224   |
| 146163 | hsa-miR-224*      | 1 | MI0000301 | hsa-mir-224   |
| 46875  | hsa-miR-2276      | 1 | MI0011282 | hsa-mir-2276  |
| 146025 | hsa-miR-2277      | 1 | MI0011284 | hsa-mir-2277  |
| 46751  | hsa-miR-2278      | 1 | MI0011285 | hsa-mir-2278  |
| 46827  | hsa-miRPlus-F1197 | 1 | MI0015873 | hsa-mir-2355  |
| 42638  | hsa-miR-23a*      | 1 | MI0000079 | hsa-mir-23a   |
| 42744  | hsa-miR-23a       | 1 | MI0000079 | hsa-mir-23a   |
| 145751 | hsa-miR-23b*      | 1 | MI0000439 | hsa-mir-23b   |
| 145841 | hsa-miR-23b       | 1 | MI0000439 | hsa-mir-23b   |
| 17506  | hsa-miR-24        | 2 | MI0000080 | hsa-mir-24-1  |
| 146043 | hsa-miR-24-1*     | 1 | MI0000080 | hsa-mir-24-1  |
| 17506  | hsa-miR-24        | 2 | MI0000081 | hsa-mir-24-2  |
| 42950  | hsa-miR-24-2*     | 1 | MI0000081 | hsa-mir-24-2  |
| 42929  | hsa-miR-25*       | 1 | MI0000082 | hsa-mir-25    |
| 42682  | hsa-miR-25        | 1 | MI0000082 | hsa-mir-25    |
| 11030  | hsa-miR-26a       | 2 | MI0000083 | hsa-mir-26a-1 |
| 42628  | hsa-miR-26a-1*    | 1 | MI0000083 | hsa-mir-26a-1 |



|        |                   |   |           |               |
|--------|-------------------|---|-----------|---------------|
| 11030  | hsa-miR-26a       | 2 | MI0000750 | hsa-mir-26a-2 |
| 42666  | hsa-miR-26a-2*    | 1 | MI0000750 | hsa-mir-26a-2 |
| 42523  | hsa-miR-26b*      | 1 | MI0000084 | hsa-mir-26b   |
| 146008 | hsa-miR-26b       | 1 | MI0000084 | hsa-mir-26b   |
| 17818  | hsa-miR-27a*      | 1 | MI0000085 | hsa-mir-27a   |
| 46483  | hsa-miR-27a       | 1 | MI0000085 | hsa-mir-27a   |
| 42823  | hsa-miR-27b*      | 1 | MI0000440 | hsa-mir-27b   |
| 145944 | hsa-miR-27b       | 1 | MI0000440 | hsa-mir-27b   |
| 145714 | hsa-miR-28-3p     | 1 | MI0000086 | hsa-mir-28    |
| 42831  | blank             | 1 | MI0000086 | hsa-mir-28    |
| 146049 | hsa-miR-28-5p     | 1 | MI0000086 | hsa-mir-28    |
| 146100 | hsa-miR-296-5p    | 1 | MI0000747 | hsa-mir-296   |
| 42528  | hsa-miR-296-3p    | 1 | MI0000747 | hsa-mir-296   |
| 6880   | hsa-miR-297       | 1 | MI0005775 | hsa-mir-297   |
| 46264  | hsa-miR-298       | 1 | MI0005523 | hsa-mir-298   |
| 11037  | hsa-miR-299-3p    | 1 | MI0000744 | hsa-mir-299   |
| 11038  | hsa-miR-299-5p    | 1 | MI0000744 | hsa-mir-299   |
| 145638 | hsa-miR-29a*      | 1 | MI0000087 | hsa-mir-29a   |
| 11039  | hsa-miR-29a       | 1 | MI0000087 | hsa-mir-29a   |
| 11040  | hsa-miR-29b       | 2 | MI0000105 | hsa-mir-29b-1 |
| 42479  | blank             | 1 | MI0000105 | hsa-mir-29b-1 |
| 17810  | hsa-miR-29b-1*    | 1 | MI0000105 | hsa-mir-29b-1 |
| 11040  | hsa-miR-29b       | 2 | MI0000107 | hsa-mir-29b-2 |
| 42792  | hsa-miR-29b-2*    | 1 | MI0000107 | hsa-mir-29b-2 |
| 14300  | hsa-miR-29c*      | 1 | MI0000735 | hsa-mir-29c   |
| 11041  | hsa-miR-29c       | 1 | MI0000735 | hsa-mir-29c   |
| 42513  | hsa-miR-300       | 1 | MI0005525 | hsa-mir-300   |
| 145947 | hsa-miRPlus-C1075 | 1 | MI0000745 | hsa-mir-301a  |
| 13143  | hsa-miR-301a      | 1 | MI0000745 | hsa-mir-301a  |
| 17886  | hsa-miR-301b      | 1 | MI0005568 | hsa-mir-301b  |
| 145639 | hsa-miR-302a      | 1 | MI0000738 | hsa-mir-302a  |
| 42541  | hsa-miR-302a*     | 1 | MI0000738 | hsa-mir-302a  |
| 42667  | hsa-miR-302b*     | 1 | MI0000772 | hsa-mir-302b  |
| 11043  | hsa-miR-302b      | 1 | MI0000772 | hsa-mir-302b  |
| 11044  | hsa-miR-302c      | 1 | MI0000773 | hsa-mir-302c  |
| 11045  | hsa-miR-302c*     | 1 | MI0000773 | hsa-mir-302c  |
| 46729  | hsa-miR-302d*     | 1 | MI0000774 | hsa-mir-302d  |
| 27838  | hsa-miR-302d      | 1 | MI0000774 | hsa-mir-302d  |
| 45764  | hsa-miR-302e      | 1 | MI0006417 | hsa-mir-302e  |
| 45745  | hsa-miR-302f      | 1 | MI0006418 | hsa-mir-302f  |
| 19595  | hsa-miR-30a*      | 1 | MI0000088 | hsa-mir-30a   |
| 146086 | hsa-miR-30a       | 1 | MI0000088 | hsa-mir-30a   |
| 46356  | hsa-miR-30b*      | 1 | MI0000441 | hsa-mir-30b   |
| 146112 | hsa-miR-30b       | 1 | MI0000441 | hsa-mir-30b   |
| 42923  | hsa-miR-30c       | 2 | MI0000736 | hsa-mir-30c-1 |
| 42702  | hsa-miR-30c-1*    | 1 | MI0000736 | hsa-mir-30c-1 |
| 42923  | hsa-miR-30c       | 2 | MI0000254 | hsa-mir-30c-2 |
| 46626  | hsa-miR-30c-2*    | 1 | MI0000254 | hsa-mir-30c-2 |
| 19596  | hsa-miR-30d       | 1 | MI0000255 | hsa-mir-30d   |
| 17853  | hsa-miR-30d*      | 1 | MI0000255 | hsa-mir-30d   |
| 28191  | hsa-miR-30e       | 1 | MI0000749 | hsa-mir-30e   |
| 145676 | hsa-miR-30e*      | 1 | MI0000749 | hsa-mir-30e   |

|        |                   |   |           |                |
|--------|-------------------|---|-----------|----------------|
| 11052  | hsa-miR-31        | 1 | MI0000089 | hsa-mir-31     |
| 46320  | hsa-miR-31*       | 1 | MI0000089 | hsa-mir-31     |
| 146066 | hsa-miR-3116      | 2 | MI0014128 | hsa-mir-3116-1 |
| 146066 | hsa-miR-3116      | 2 | MI0014129 | hsa-mir-3116-2 |
| 146005 | hsa-miR-3129      | 1 | MI0014146 | hsa-mir-3129   |
| 146101 | blank             | 1 | MI0014146 | hsa-mir-3129   |
| 46863  | hsa-miRPlus-F1246 | 1 | MI0014185 | hsa-mir-3157   |
| 46710  | hsa-miR-3157      | 1 | MI0014185 | hsa-mir-3157   |
| 146110 | hsa-miR-3164      | 1 | MI0014194 | hsa-mir-3164   |
| 146085 | hsa-miR-3170      | 1 | MI0014201 | hsa-mir-3170   |
| 146093 | hsa-miRPlus-G1093 | 1 | MI0014209 | hsa-mir-3175   |
| 46567  | hsa-miR-3176      | 1 | MI0014210 | hsa-mir-3176   |
| 146152 | hsa-miR-3179      | 3 | MI0014213 | hsa-mir-3179-1 |
| 146152 | hsa-miR-3179      | 3 | MI0014216 | hsa-mir-3179-2 |
| 146152 | hsa-miR-3179      | 3 | MI0014221 | hsa-mir-3179-3 |
| 46274  | hsa-miR-3187      | 1 | MI0014231 | hsa-mir-3187   |
| 11053  | hsa-miR-32        | 1 | MI0000090 | hsa-mir-32     |
| 29575  | hsa-miR-32*       | 1 | MI0000090 | hsa-mir-32     |
| 146158 | hsa-miR-3202      | 2 | MI0014252 | hsa-mir-3202-1 |
| 146158 | hsa-miR-3202      | 2 | MI0014253 | hsa-mir-3202-2 |
| 27533  | hsa-miR-320a      | 1 | MI0000542 | hsa-mir-320a   |
| 46324  | hsa-miR-320b      | 2 | MI0003776 | hsa-mir-320b-1 |
| 46324  | hsa-miR-320b      | 2 | MI0003839 | hsa-mir-320b-2 |
| 46228  | hsa-miR-320c      | 2 | MI0003778 | hsa-mir-320c-1 |
| 46228  | hsa-miR-320c      | 2 | MI0008191 | hsa-mir-320c-2 |
| 46870  | hsa-miR-320d      | 2 | MI0008190 | hsa-mir-320d-1 |
| 46870  | hsa-miR-320d      | 2 | MI0008192 | hsa-mir-320d-2 |
| 42457  | hsa-miR-323-5p    | 1 | MI0000807 | hsa-mir-323    |
| 42957  | hsa-miR-323-3p    | 1 | MI0000807 | hsa-mir-323    |
| 42672  | hsa-miR-323b-5p   | 1 | MI0014206 | hsa-mir-323b   |
| 145708 | hsa-miR-324-3p    | 1 | MI0000813 | hsa-mir-324    |
| 42477  | hsa-miR-324-5p    | 1 | MI0000813 | hsa-mir-324    |
| 42719  | blank             | 1 | MI0000813 | hsa-mir-324    |
| 11058  | hsa-miR-325       | 1 | MI0000824 | hsa-mir-325    |
| 42838  | hsa-miRPlus-C1076 | 1 | MI0000808 | hsa-mir-326    |
| 42693  | hsa-miR-326       | 1 | MI0000808 | hsa-mir-326    |
| 145640 | hsa-miR-328       | 1 | MI0000804 | hsa-mir-328    |
| 11061  | hsa-miR-329       | 2 | MI0001725 | hsa-mir-329-1  |
| 11061  | hsa-miR-329       | 2 | MI0001726 | hsa-mir-329-2  |
| 145843 | hsa-miR-330-5p    | 1 | MI0000803 | hsa-mir-330    |
| 11063  | hsa-miR-330-3p    | 1 | MI0000803 | hsa-mir-330    |
| 17866  | hsa-miR-331-5p    | 1 | MI0000812 | hsa-mir-331    |
| 42887  | hsa-miR-331-3p    | 1 | MI0000812 | hsa-mir-331    |
| 145745 | hsa-miR-335*      | 1 | MI0000816 | hsa-mir-335    |
| 11065  | hsa-miR-335       | 1 | MI0000816 | hsa-mir-335    |
| 42673  | hsa-miR-337-3p    | 1 | MI0000806 | hsa-mir-337    |
| 11066  | blank             | 1 | MI0000806 | hsa-mir-337    |
| 17944  | hsa-miR-337-5p    | 1 | MI0000806 | hsa-mir-337    |
| 42592  | hsa-miR-338-3p    | 1 | MI0000814 | hsa-mir-338    |
| 17825  | hsa-miR-338-5p    | 1 | MI0000814 | hsa-mir-338    |
| 42912  | hsa-miR-339-3p    | 1 | MI0000815 | hsa-mir-339    |
| 42739  | hsa-miR-339-5p    | 1 | MI0000815 | hsa-mir-339    |

|        |                   |   |           |                |
|--------|-------------------|---|-----------|----------------|
| 145859 | hsa-miR-33a       | 1 | MI0000091 | hsa-mir-33a    |
| 145757 | hsa-miR-33a*      | 1 | MI0000091 | hsa-mir-33a    |
| 145950 | hsa-miR-33b       | 1 | MI0003646 | hsa-mir-33b    |
| 145734 | hsa-miR-33b*      | 1 | MI0003646 | hsa-mir-33b    |
| 42738  | hsa-miR-340*      | 1 | MI0000802 | hsa-mir-340    |
| 29872  | hsa-miR-340       | 1 | MI0000802 | hsa-mir-340    |
| 32884  | hsa-miR-342-3p    | 1 | MI0000805 | hsa-mir-342    |
| 42576  | hsa-miR-342-5p    | 1 | MI0000805 | hsa-mir-342    |
| 42934  | hsa-miR-345       | 1 | MI0000825 | hsa-mir-345    |
| 145732 | hsa-miR-346       | 1 | MI0000826 | hsa-mir-346    |
| 46299  | hsa-miR-34a*      | 1 | MI0000268 | hsa-mir-34a    |
| 27217  | hsa-miR-34a       | 1 | MI0000268 | hsa-mir-34a    |
| 11073  | hsa-miR-34b*      | 1 | MI0000742 | hsa-mir-34b    |
| 42724  | hsa-miR-34b       | 1 | MI0000742 | hsa-mir-34b    |
| 11074  | hsa-miR-34c-5p    | 1 | MI0000743 | hsa-mir-34c    |
| 42729  | hsa-miR-34c-3p    | 1 | MI0000743 | hsa-mir-34c    |
| 145935 | hsa-miRPlus-E1232 | 1 | MI0015995 | hsa-mir-3605   |
| 14301  | hsa-miR-361-5p    | 1 | MI0000760 | hsa-mir-361    |
| 145865 | hsa-miR-361-3p    | 1 | MI0000760 | hsa-mir-361    |
| 42503  | hsa-miR-362-5p    | 1 | MI0000762 | hsa-mir-362    |
| 14279  | blank             | 1 | MI0000762 | hsa-mir-362    |
| 17893  | hsa-miR-362-3p    | 1 | MI0000762 | hsa-mir-362    |
| 11077  | hsa-miR-363       | 1 | MI0000764 | hsa-mir-363    |
| 27544  | hsa-miR-363*      | 1 | MI0000764 | hsa-mir-363    |
| 46263  | hsa-miRPlus-E1236 | 1 | MI0016048 | hsa-mir-3648   |
| 11078  | hsa-miR-365       | 2 | MI0000767 | hsa-mir-365-1  |
| 11078  | hsa-miR-365       | 2 | MI0000769 | hsa-mir-365-2  |
| 146029 | hsa-miR-365*      | 1 | MI0000769 | hsa-mir-365-2  |
| 145697 | hsa-miR-367*      | 1 | MI0000775 | hsa-mir-367    |
| 14280  | hsa-miR-367       | 1 | MI0000775 | hsa-mir-367    |
| 145641 | hsa-miR-369-5p    | 1 | MI0000777 | hsa-mir-369    |
| 29529  | hsa-miR-369-3p    | 1 | MI0000777 | hsa-mir-369    |
| 42967  | hsa-miR-370       | 1 | MI0000778 | hsa-mir-370    |
| 145769 | hsa-miR-371-5p    | 1 | MI0000779 | hsa-mir-371    |
| 11083  | hsa-miR-371-3p    | 1 | MI0000779 | hsa-mir-371    |
| 11084  | hsa-miR-372       | 1 | MI0000780 | hsa-mir-372    |
| 17892  | hsa-miRPlus-C1087 | 1 | MI0000780 | hsa-mir-372    |
| 11085  | hsa-miR-373       | 1 | MI0000781 | hsa-mir-373    |
| 27545  | hsa-miR-373*      | 1 | MI0000781 | hsa-mir-373    |
| 145844 | hsa-miR-374a      | 1 | MI0000782 | hsa-mir-374a   |
| 29577  | hsa-miR-374a*     | 1 | MI0000782 | hsa-mir-374a   |
| 14302  | hsa-miR-374b      | 2 | MI0005566 | hsa-mir-374b   |
| 42476  | hsa-miR-374b*     | 1 | MI0005566 | hsa-mir-374b   |
| 14302  | hsa-miR-374b      | 2 | MI0016684 | hsa-mir-374c   |
| 46918  | hsa-miR-375       | 1 | MI0000783 | hsa-mir-375    |
| 146009 | hsa-miR-376a      | 2 | MI0000784 | hsa-mir-376a-1 |
| 42885  | hsa-miR-376a*     | 1 | MI0000784 | hsa-mir-376a-1 |
| 14268  | blank             | 1 | MI0000784 | hsa-mir-376a-1 |
| 146009 | hsa-miR-376a      | 2 | MI0003529 | hsa-mir-376a-2 |
| 42453  | blank             | 2 | MI0002466 | hsa-mir-376b   |
| 145642 | hsa-miR-376b      | 1 | MI0002466 | hsa-mir-376b   |
| 42453  | blank             | 2 | MI0000776 | hsa-mir-376c   |

|        |                   |   |           |                |
|--------|-------------------|---|-----------|----------------|
| 42629  | hsa-miR-376c      | 1 | MI0000776 | hsa-mir-376c   |
| 11091  | hsa-miR-377       | 1 | MI0000785 | hsa-mir-377    |
| 42899  | hsa-miR-377*      | 1 | MI0000785 | hsa-mir-377    |
| 11105  | hsa-miR-378/hsa-m | 4 | MI0000786 | hsa-mir-378    |
| 11092  | hsa-miR-378*      | 1 | MI0000786 | hsa-mir-378    |
| 11105  | hsa-miR-378/hsa-m | 4 | MI0015825 | hsa-mir-378c   |
| 11105  | hsa-miR-378/hsa-m | 4 | MI0016749 | hsa-mir-378d-1 |
| 11105  | hsa-miR-378/hsa-m | 4 | MI0003840 | hsa-mir-378d-2 |
| 11093  | hsa-miR-379       | 1 | MI0000787 | hsa-mir-379    |
| 42889  | hsa-miR-379*      | 1 | MI0000787 | hsa-mir-379    |
| 27546  | hsa-miR-380       | 1 | MI0000788 | hsa-mir-380    |
| 28161  | blank             | 1 | MI0000788 | hsa-mir-380    |
| 13170  | hsa-miR-380*      | 1 | MI0000788 | hsa-mir-380    |
| 145832 | hsa-miR-381       | 1 | MI0000789 | hsa-mir-381    |
| 17932  | hsa-miRPlus-C1089 | 1 | MI0000789 | hsa-mir-381    |
| 46338  | blank             | 1 | MI0000790 | hsa-mir-382    |
| 145643 | hsa-miR-382       | 1 | MI0000790 | hsa-mir-382    |
| 14307  | blank             | 1 | MI0000790 | hsa-mir-382    |
| 146024 | hsa-miR-383       | 1 | MI0000791 | hsa-mir-383    |
| 145687 | hsa-miR-384       | 1 | MI0001145 | hsa-mir-384    |
| 46472  | hsa-miRPlus-F1011 | 1 | MI0016424 | hsa-mir-3918   |
| 146190 | blank             | 1 | MI0016435 | hsa-mir-3927   |
| 46762  | hsa-miRPlus-F1252 | 1 | MI0016438 | hsa-mir-3928   |
| 46716  | hsa-miRPlus-F1186 | 1 | MI0016438 | hsa-mir-3928   |
| 46736  | hsa-miRPlus-F1015 | 1 | MI0016600 | hsa-mir-3943   |
| 11240  | blank             | 1 | MI0001735 | hsa-mir-409    |
| 145644 | hsa-miR-409-3p    | 1 | MI0001735 | hsa-mir-409    |
| 42448  | blank             | 1 | MI0001735 | hsa-mir-409    |
| 42925  | hsa-miR-409-5p    | 1 | MI0001735 | hsa-mir-409    |
| 11102  | hsa-miR-410       | 1 | MI0002465 | hsa-mir-410    |
| 42784  | hsa-miR-411*      | 1 | MI0003675 | hsa-mir-411    |
| 17482  | hsa-miR-411       | 1 | MI0003675 | hsa-mir-411    |
| 42764  | hsa-miR-412       | 1 | MI0002464 | hsa-mir-412    |
| 17474  | hsa-miR-421       | 1 | MI0003685 | hsa-mir-421    |
| 11274  | blank             | 1 | MI0003685 | hsa-mir-421    |
| 11104  | hsa-miR-422a      | 1 | MI0001444 | hsa-mir-422a   |
| 27565  | hsa-miR-423-5p    | 1 | MI0001445 | hsa-mir-423    |
| 42730  | hsa-miR-423-3p    | 1 | MI0001445 | hsa-mir-423    |
| 42965  | hsa-miR-424       | 1 | MI0001446 | hsa-mir-424    |
| 42603  | hsa-miR-424*      | 1 | MI0001446 | hsa-mir-424    |
| 17608  | hsa-miR-425       | 1 | MI0001448 | hsa-mir-425    |
| 11108  | hsa-miR-425*      | 1 | MI0001448 | hsa-mir-425    |
| 13171  | hsa-miR-429       | 1 | MI0001641 | hsa-mir-429    |
| 42674  | hsa-miR-431*      | 1 | MI0001721 | hsa-mir-431    |
| 145705 | hsa-miR-431       | 1 | MI0001721 | hsa-mir-431    |
| 42584  | hsa-miR-432*      | 1 | MI0003133 | hsa-mir-432    |
| 11111  | hsa-miR-432       | 1 | MI0003133 | hsa-mir-432    |
| 42853  | hsa-miR-433       | 1 | MI0001723 | hsa-mir-433    |
| 11245  | blank             | 1 | MI0001723 | hsa-mir-433    |
| 46743  | hsa-miRPlus-F1179 | 1 | MI0016783 | hsa-mir-4440   |
| 46585  | hsa-miRPlus-F1033 | 1 | MI0016821 | hsa-mir-4470   |
| 11113  | hsa-miR-448       | 1 | MI0001637 | hsa-mir-448    |

|        |                   |   |           |                |
|--------|-------------------|---|-----------|----------------|
| 46808  | hsa-miRPlus-E1028 | 1 | MI0016846 | hsa-mir-4485   |
| 145946 | hsa-miR-449a      | 1 | MI0001648 | hsa-mir-449a   |
| 146127 | hsa-miR-449b*     | 1 | MI0003673 | hsa-mir-449b   |
| 46249  | blank             | 1 | MI0003673 | hsa-mir-449b   |
| 33668  | hsa-miR-449b      | 1 | MI0003673 | hsa-mir-449b   |
| 146020 | hsa-miR-449c*     | 1 | MI0003823 | hsa-mir-449c   |
| 146151 | hsa-miR-449c      | 1 | MI0003823 | hsa-mir-449c   |
| 17835  | blank             | 2 | MI0001652 | hsa-mir-450a-1 |
| 18847  | hsa-miR-450a      | 2 | MI0001652 | hsa-mir-450a-1 |
| 17835  | blank             | 2 | MI0003187 | hsa-mir-450a-2 |
| 18847  | hsa-miR-450a      | 2 | MI0003187 | hsa-mir-450a-2 |
| 42896  | hsa-miR-450b-5p   | 1 | MI0005531 | hsa-mir-450b   |
| 42892  | hsa-miR-450b-3p   | 1 | MI0005531 | hsa-mir-450b   |
| 42866  | hsa-miR-451       | 1 | MI0001729 | hsa-mir-451    |
| 42598  | hsa-miR-452*      | 1 | MI0001733 | hsa-mir-452    |
| 29379  | hsa-miR-452       | 1 | MI0001733 | hsa-mir-452    |
| 46879  | blank             | 1 | MI0001733 | hsa-mir-452    |
| 146104 | blank             | 1 | MI0016891 | hsa-mir-4524   |
| 28520  | hsa-miR-454*      | 1 | MI0003820 | hsa-mir-454    |
| 145720 | hsa-miR-454       | 1 | MI0003820 | hsa-mir-454    |
| 28950  | hsa-miR-455-3p    | 1 | MI0003513 | hsa-mir-455    |
| 13179  | hsa-miR-455-5p    | 1 | MI0003513 | hsa-mir-455    |
| 46731  | hsa-miRPlus-F1017 | 1 | MI0017285 | hsa-mir-4657   |
| 46678  | hsa-miRPlus-F1077 | 1 | MI0017330 | hsa-mir-4697   |
| 146124 | blank             | 1 | MI0017443 | hsa-mir-4796   |
| 42654  | hsa-miR-483-5p    | 1 | MI0002467 | hsa-mir-483    |
| 146076 | hsa-miR-483-3p    | 1 | MI0002467 | hsa-mir-483    |
| 145753 | hsa-miR-484       | 1 | MI0002468 | hsa-mir-484    |
| 42480  | hsa-miR-485-5p    | 1 | MI0002469 | hsa-mir-485    |
| 42694  | hsa-miR-485-3p    | 1 | MI0002469 | hsa-mir-485    |
| 32946  | hsa-miR-486-5p    | 1 | MI0002470 | hsa-mir-486    |
| 42946  | hsa-miR-486-3p    | 1 | MI0002470 | hsa-mir-486    |
| 13183  | hsa-miR-487a      | 1 | MI0002471 | hsa-mir-487a   |
| 14285  | hsa-miR-487b      | 1 | MI0003530 | hsa-mir-487b   |
| 42704  | hsa-miR-488       | 1 | MI0003123 | hsa-mir-488    |
| 145756 | hsa-miR-488*      | 1 | MI0003123 | hsa-mir-488    |
| 11121  | hsa-miR-489       | 1 | MI0003124 | hsa-mir-489    |
| 42703  | hsa-miR-490-3p    | 1 | MI0003125 | hsa-mir-490    |
| 17822  | hsa-miR-490-5p    | 1 | MI0003125 | hsa-mir-490    |
| 11123  | hsa-miR-491-5p    | 1 | MI0003126 | hsa-mir-491    |
| 17927  | hsa-miR-491-3p    | 1 | MI0003126 | hsa-mir-491    |
| 145928 | blank             | 1 | MI0003126 | hsa-mir-491    |
| 42661  | hsa-miR-492       | 1 | MI0003131 | hsa-mir-492    |
| 11125  | hsa-miR-493*      | 1 | MI0003132 | hsa-mir-493    |
| 14270  | hsa-miR-493       | 1 | MI0003132 | hsa-mir-493    |
| 42540  | blank             | 1 | MI0003134 | hsa-mir-494    |
| 145901 | hsa-miR-494       | 1 | MI0003134 | hsa-mir-494    |
| 42676  | hsa-miR-495       | 1 | MI0003135 | hsa-mir-495    |
| 145698 | hsa-miR-496       | 1 | MI0003136 | hsa-mir-496    |
| 42847  | hsa-miR-497       | 1 | MI0003138 | hsa-mir-497    |
| 42558  | hsa-miR-497*      | 1 | MI0003138 | hsa-mir-497    |
| 42442  | hsa-miR-498       | 1 | MI0003142 | hsa-mir-498    |

|        |                    |   |           |                |
|--------|--------------------|---|-----------|----------------|
| 14313  | hsa-miR-499-5p     | 1 | MI0003183 | hsa-mir-499    |
| 145692 | hsa-miR-499-3p     | 1 | MI0003183 | hsa-mir-499    |
| 17875  | hsa-miR-500        | 2 | MI0003184 | hsa-mir-500a   |
| 46406  | hsa-miR-500*       | 1 | MI0003184 | hsa-mir-500a   |
| 17875  | hsa-miR-500        | 2 | MI0015903 | hsa-mir-500b   |
| 145675 | hsa-miR-501-5p     | 1 | MI0003185 | hsa-mir-501    |
| 145727 | blank              | 1 | MI0003185 | hsa-mir-501    |
| 42578  | hsa-miR-501-3p     | 1 | MI0003185 | hsa-mir-501    |
| 146178 | hsa-miR-502-3p     | 1 | MI0003186 | hsa-mir-502    |
| 11134  | hsa-miR-502-5p     | 1 | MI0003186 | hsa-mir-502    |
| 46803  | hsa-miR-503        | 1 | MI0003188 | hsa-mir-503    |
| 42721  | hsa-miRPlus-C1099  | 1 | MI0003188 | hsa-mir-503    |
| 28480  | hsa-miR-504        | 1 | MI0003189 | hsa-mir-504    |
| 42490  | hsa-miR-505*       | 1 | MI0003190 | hsa-mir-505    |
| 42669  | hsa-miR-505        | 1 | MI0003190 | hsa-mir-505    |
| 11138  | hsa-miR-506        | 1 | MI0003193 | hsa-mir-506    |
| 11139  | hsa-miR-507        | 1 | MI0003194 | hsa-mir-507    |
| 42812  | hsa-miR-508-5p     | 1 | MI0003195 | hsa-mir-508    |
| 11140  | hsa-miR-508-3p     | 1 | MI0003195 | hsa-mir-508    |
| 11141  | hsa-miR-509-3p     | 3 | MI0003196 | hsa-mir-509-1  |
| 145835 | hsa-miR-509-5p     | 2 | MI0003196 | hsa-mir-509-1  |
| 11141  | hsa-miR-509-3p     | 3 | MI0005530 | hsa-mir-509-2  |
| 145835 | hsa-miR-509-5p     | 2 | MI0005530 | hsa-mir-509-2  |
| 11141  | hsa-miR-509-3p     | 3 | MI0005717 | hsa-mir-509-3  |
| 145824 | hsa-miR-509-3-5p   | 1 | MI0005717 | hsa-mir-509-3  |
| 11142  | hsa-miR-510        | 1 | MI0003197 | hsa-mir-510    |
| 27229  | hsa-miR-511        | 2 | MI0003127 | hsa-mir-511-1  |
| 17841  | hsa-miRPlus-C1100  | 2 | MI0003127 | hsa-mir-511-1  |
| 27229  | hsa-miR-511        | 2 | MI0003128 | hsa-mir-511-2  |
| 17841  | hsa-miRPlus-C1100  | 2 | MI0003128 | hsa-mir-511-2  |
| 145690 | hsa-miR-512-5p     | 2 | MI0003140 | hsa-mir-512-1  |
| 11144  | hsa-miR-512-3p     | 2 | MI0003140 | hsa-mir-512-1  |
| 145690 | hsa-miR-512-5p     | 2 | MI0003141 | hsa-mir-512-2  |
| 11144  | hsa-miR-512-3p     | 2 | MI0003141 | hsa-mir-512-2  |
| 42960  | hsa-miR-513a-3p    | 3 | MI0003191 | hsa-mir-513a-1 |
| 42581  | hsa-miR-513a-5p    | 2 | MI0003191 | hsa-mir-513a-1 |
| 42960  | hsa-miR-513a-3p    | 3 | MI0003192 | hsa-mir-513a-2 |
| 42581  | hsa-miR-513a-5p    | 2 | MI0003192 | hsa-mir-513a-2 |
| 46789  | hsa-miR-513b       | 1 | MI0006648 | hsa-mir-513b   |
| 42960  | hsa-miR-513a-3p    | 3 | MI0006649 | hsa-mir-513c   |
| 46398  | hsa-miR-513c       | 1 | MI0006649 | hsa-mir-513c   |
| 42959  | hsa-miR-514        | 3 | MI0003198 | hsa-mir-514-1  |
| 42959  | hsa-miR-514        | 3 | MI0003199 | hsa-mir-514-2  |
| 42959  | hsa-miR-514        | 3 | MI0003200 | hsa-mir-514-3  |
| 11149  | hsa-miR-515-5p     | 2 | MI0003144 | hsa-mir-515-1  |
| 11148  | hsa-miR-515-3p     | 2 | MI0003144 | hsa-mir-515-1  |
| 11149  | hsa-miR-515-5p     | 2 | MI0003147 | hsa-mir-515-2  |
| 11148  | hsa-miR-515-3p     | 2 | MI0003147 | hsa-mir-515-2  |
| 145717 | hsa-miR-516a-3p/h: | 4 | MI0003180 | hsa-mir-516a-1 |
| 42550  | hsa-miR-516a-5p    | 2 | MI0003180 | hsa-mir-516a-1 |
| 145717 | hsa-miR-516a-3p/h: | 4 | MI0003181 | hsa-mir-516a-2 |
| 42550  | hsa-miR-516a-5p    | 2 | MI0003181 | hsa-mir-516a-2 |

|        |                    |   |           |                |
|--------|--------------------|---|-----------|----------------|
| 145717 | hsa-miR-516a-3p/h: | 4 | MI0003172 | hsa-mir-516b-1 |
| 11151  | hsa-miR-516b       | 2 | MI0003172 | hsa-mir-516b-1 |
| 145717 | hsa-miR-516a-3p/h: | 4 | MI0003167 | hsa-mir-516b-2 |
| 11151  | hsa-miR-516b       | 2 | MI0003167 | hsa-mir-516b-2 |
| 13130  | hsa-miR-517*       | 3 | MI0003161 | hsa-mir-517a   |
| 46347  | blank              | 2 | MI0003161 | hsa-mir-517a   |
| 145999 | hsa-miR-517a       | 2 | MI0003161 | hsa-mir-517a   |
| 42450  | hsa-miR-517b       | 2 | MI0003161 | hsa-mir-517a   |
| 13130  | hsa-miR-517*       | 3 | MI0003165 | hsa-mir-517b   |
| 46347  | blank              | 2 | MI0003165 | hsa-mir-517b   |
| 145999 | hsa-miR-517a       | 2 | MI0003165 | hsa-mir-517b   |
| 42450  | hsa-miR-517b       | 2 | MI0003165 | hsa-mir-517b   |
| 13130  | hsa-miR-517*       | 3 | MI0003174 | hsa-mir-517c   |
| 11154  | hsa-miR-517c       | 1 | MI0003174 | hsa-mir-517c   |
| 145905 | hsa-miR-518a-5p/h: | 3 | MI0003170 | hsa-mir-518a-1 |
| 11177  | blank              | 3 | MI0003170 | hsa-mir-518a-1 |
| 11155  | hsa-miR-518a-3p    | 2 | MI0003170 | hsa-mir-518a-1 |
| 145905 | hsa-miR-518a-5p/h: | 3 | MI0003173 | hsa-mir-518a-2 |
| 11177  | blank              | 3 | MI0003173 | hsa-mir-518a-2 |
| 11155  | hsa-miR-518a-3p    | 2 | MI0003173 | hsa-mir-518a-2 |
| 145725 | hsa-miR-518b       | 1 | MI0003156 | hsa-mir-518b   |
| 105441 | hsa-miR-518c       | 1 | MI0003159 | hsa-mir-518c   |
| 145821 | hsa-miR-518c*      | 1 | MI0003159 | hsa-mir-518c   |
| 146136 | hsa-miR-518d-5p/h: | 4 | MI0003171 | hsa-mir-518d   |
| 145965 | hsa-miR-518d-3p    | 1 | MI0003171 | hsa-mir-518d   |
| 13137  | hsa-miR-518e*/hsa  | 6 | MI0003169 | hsa-mir-518e   |
| 11159  | hsa-miR-518e       | 1 | MI0003169 | hsa-mir-518e   |
| 145748 | hsa-miR-518f       | 1 | MI0003154 | hsa-mir-518f   |
| 46622  | hsa-miR-518f*      | 1 | MI0003154 | hsa-mir-518f   |
| 13137  | hsa-miR-518e*/hsa  | 6 | MI0003178 | hsa-mir-519a-1 |
| 46401  | hsa-miR-519a       | 2 | MI0003178 | hsa-mir-519a-1 |
| 46401  | hsa-miR-519a       | 2 | MI0003182 | hsa-mir-519a-2 |
| 13137  | hsa-miR-518e*/hsa  | 6 | MI0003151 | hsa-mir-519b   |
| 46231  | hsa-miR-519b-3p    | 1 | MI0003151 | hsa-mir-519b   |
| 13137  | hsa-miR-518e*/hsa  | 6 | MI0003148 | hsa-mir-519c   |
| 145723 | hsa-miR-519c-3p    | 1 | MI0003148 | hsa-mir-519c   |
| 46221  | hsa-miR-519d       | 1 | MI0003162 | hsa-mir-519d   |
| 11164  | hsa-miR-519e       | 1 | MI0003145 | hsa-mir-519e   |
| 13132  | hsa-miR-519e*      | 1 | MI0003145 | hsa-mir-519e   |
| 11165  | hsa-miR-520a-3p    | 1 | MI0003149 | hsa-mir-520a   |
| 13133  | hsa-miR-520a-5p    | 1 | MI0003149 | hsa-mir-520a   |
| 145785 | hsa-miR-526b*      | 3 | MI0003155 | hsa-mir-520b   |
| 11166  | hsa-miR-520b/hsa-r | 2 | MI0003155 | hsa-mir-520b   |
| 146136 | hsa-miR-518d-5p/h: | 4 | MI0003158 | hsa-mir-520c   |
| 145785 | hsa-miR-526b*      | 3 | MI0003158 | hsa-mir-520c   |
| 42455  | hsa-miR-520f       | 2 | MI0003158 | hsa-mir-520c   |
| 11166  | hsa-miR-520b/hsa-r | 2 | MI0003158 | hsa-mir-520c   |
| 46227  | blank              | 1 | MI0003158 | hsa-mir-520c   |
| 145819 | blank              | 1 | MI0003158 | hsa-mir-520c   |
| 46354  | hsa-miR-520d-5p    | 1 | MI0003164 | hsa-mir-520d   |
| 11168  | hsa-miR-520d-3p    | 1 | MI0003164 | hsa-mir-520d   |
| 145722 | hsa-miR-520e       | 1 | MI0003143 | hsa-mir-520e   |

|        |                    |   |           |                |
|--------|--------------------|---|-----------|----------------|
| 42455  | hsa-miR-520f       | 2 | MI0003146 | hsa-mir-520f   |
| 13146  | blank              | 2 | MI0003166 | hsa-mir-520g   |
| 146204 | blank              | 2 | MI0003166 | hsa-mir-520g   |
| 46500  | hsa-miR-520g/hsa-r | 2 | MI0003166 | hsa-mir-520g   |
| 46454  | hsa-miR-520g       | 1 | MI0003166 | hsa-mir-520g   |
| 13146  | blank              | 2 | MI0003175 | hsa-mir-520h   |
| 146204 | blank              | 2 | MI0003175 | hsa-mir-520h   |
| 46500  | hsa-miR-520g/hsa-r | 2 | MI0003175 | hsa-mir-520h   |
| 11171  | hsa-miR-521        | 2 | MI0003176 | hsa-mir-521-1  |
| 11171  | hsa-miR-521        | 2 | MI0003163 | hsa-mir-521-2  |
| 13137  | hsa-miR-518e*/hsa  | 6 | MI0003177 | hsa-mir-522    |
| 42483  | hsa-miR-522        | 1 | MI0003177 | hsa-mir-522    |
| 13137  | hsa-miR-518e*/hsa  | 6 | MI0003153 | hsa-mir-523    |
| 145754 | hsa-miR-523        | 1 | MI0003153 | hsa-mir-523    |
| 31349  | hsa-miR-524-3p     | 1 | MI0003160 | hsa-mir-524    |
| 46235  | hsa-miR-524-5p     | 1 | MI0003160 | hsa-mir-524    |
| 11175  | hsa-miR-525-5p     | 1 | MI0003152 | hsa-mir-525    |
| 46495  | hsa-miR-525-3p     | 1 | MI0003152 | hsa-mir-525    |
| 146136 | hsa-miR-518d-5p/h: | 4 | MI0003157 | hsa-mir-526a-1 |
| 146136 | hsa-miR-518d-5p/h: | 4 | MI0003168 | hsa-mir-526a-2 |
| 145785 | hsa-miR-526b*      | 3 | MI0003150 | hsa-mir-526b   |
| 46744  | hsa-miR-526b       | 1 | MI0003150 | hsa-mir-526b   |
| 145905 | hsa-miR-518a-5p/h: | 3 | MI0003179 | hsa-mir-527    |
| 11177  | blank              | 3 | MI0003179 | hsa-mir-527    |
| 17624  | hsa-miR-532-5p     | 1 | MI0003205 | hsa-mir-532    |
| 42732  | hsa-miR-532-3p     | 1 | MI0003205 | hsa-mir-532    |
| 14271  | hsa-miR-539        | 1 | MI0003514 | hsa-mir-539    |
| 42635  | hsa-miR-541        | 1 | MI0005539 | hsa-mir-541    |
| 42617  | hsa-miR-541*       | 1 | MI0005539 | hsa-mir-541    |
| 42811  | hsa-miR-542-5p     | 1 | MI0003686 | hsa-mir-542    |
| 14272  | hsa-miR-542-3p     | 1 | MI0003686 | hsa-mir-542    |
| 145689 | hsa-miR-543        | 1 | MI0005565 | hsa-mir-543    |
| 42470  | blank              | 1 | MI0005565 | hsa-mir-543    |
| 33043  | hsa-miR-544        | 1 | MI0003515 | hsa-mir-544    |
| 145741 | hsa-miR-545        | 1 | MI0003516 | hsa-mir-545    |
| 42956  | hsa-miR-545*       | 1 | MI0003516 | hsa-mir-545    |
| 17535  | hsa-miR-548a-3p    | 3 | MI0003593 | hsa-mir-548a-1 |
| 17535  | hsa-miR-548a-3p    | 3 | MI0003598 | hsa-mir-548a-2 |
| 17535  | hsa-miR-548a-3p    | 3 | MI0003612 | hsa-mir-548a-3 |
| 30493  | hsa-miR-548a-5p    | 1 | MI0003612 | hsa-mir-548a-3 |
| 42777  | hsa-miR-548c-5p    | 3 | MI0016904 | hsa-mir-548am  |
| 17298  | hsa-miR-548b-3p    | 1 | MI0003596 | hsa-mir-548b   |
| 42791  | hsa-miR-548b-5p    | 1 | MI0003596 | hsa-mir-548b   |
| 42777  | hsa-miR-548c-5p    | 3 | MI0003630 | hsa-mir-548c   |
| 145686 | hsa-miR-548c-3p    | 1 | MI0003630 | hsa-mir-548c   |
| 42756  | hsa-miR-548d-5p    | 2 | MI0003668 | hsa-mir-548d-1 |
| 27549  | hsa-miR-548d-3p    | 2 | MI0003668 | hsa-mir-548d-1 |
| 42756  | hsa-miR-548d-5p    | 2 | MI0003671 | hsa-mir-548d-2 |
| 27549  | hsa-miR-548d-3p    | 2 | MI0003671 | hsa-mir-548d-2 |
| 46703  | hsa-miR-548e       | 1 | MI0006344 | hsa-mir-548e   |
| 45736  | hsa-miR-548f       | 5 | MI0006374 | hsa-mir-548f-1 |
| 45736  | hsa-miR-548f       | 5 | MI0006375 | hsa-mir-548f-2 |



|        |                   |   |           |                |
|--------|-------------------|---|-----------|----------------|
| 45736  | hsa-miR-548f      | 5 | MI0006376 | hsa-mir-548f-3 |
| 45736  | hsa-miR-548f      | 5 | MI0006377 | hsa-mir-548f-4 |
| 45736  | hsa-miR-548f      | 5 | MI0006378 | hsa-mir-548f-5 |
| 46940  | hsa-miR-548g      | 2 | MI0006378 | hsa-mir-548f-5 |
| 46940  | hsa-miR-548g      | 2 | MI0006395 | hsa-mir-548g   |
| 46414  | hsa-miR-548h      | 5 | MI0006411 | hsa-mir-548h-1 |
| 46414  | hsa-miR-548h      | 5 | MI0006412 | hsa-mir-548h-2 |
| 46414  | hsa-miR-548h      | 5 | MI0006413 | hsa-mir-548h-3 |
| 46414  | hsa-miR-548h      | 5 | MI0006414 | hsa-mir-548h-4 |
| 46414  | hsa-miR-548h      | 5 | MI0016751 | hsa-mir-548h-5 |
| 46704  | hsa-miR-548i      | 4 | MI0006421 | hsa-mir-548i-1 |
| 46704  | hsa-miR-548i      | 4 | MI0006422 | hsa-mir-548i-2 |
| 46704  | hsa-miR-548i      | 4 | MI0006423 | hsa-mir-548i-3 |
| 46704  | hsa-miR-548i      | 4 | MI0006424 | hsa-mir-548i-4 |
| 46592  | hsa-miR-548j      | 1 | MI0006345 | hsa-mir-548j   |
| 46705  | hsa-miR-548k      | 1 | MI0006354 | hsa-mir-548k   |
| 46415  | hsa-miR-548l      | 1 | MI0006361 | hsa-mir-548l   |
| 46335  | hsa-miR-548m      | 1 | MI0006400 | hsa-mir-548m   |
| 46929  | hsa-miR-548n      | 1 | MI0006399 | hsa-mir-548n   |
| 46450  | hsa-miR-548o      | 2 | MI0006402 | hsa-mir-548o   |
| 42777  | hsa-miR-548c-5p   | 3 | MI0016746 | hsa-mir-548o-2 |
| 46450  | hsa-miR-548o      | 2 | MI0016746 | hsa-mir-548o-2 |
| 46355  | hsa-miR-548p      | 1 | MI0006420 | hsa-mir-548p   |
| 146148 | hsa-miR-548q      | 1 | MI0010637 | hsa-mir-548q   |
| 145762 | hsa-miR-549       | 1 | MI0003679 | hsa-mir-549    |
| 17660  | hsa-miR-550*      | 3 | MI0003600 | hsa-mir-550a-1 |
| 145789 | hsa-miR-550       | 3 | MI0003600 | hsa-mir-550a-1 |
| 17660  | hsa-miR-550*      | 3 | MI0003601 | hsa-mir-550a-2 |
| 145789 | hsa-miR-550       | 3 | MI0003601 | hsa-mir-550a-2 |
| 17660  | hsa-miR-550*      | 3 | MI0003762 | hsa-mir-550a-3 |
| 145789 | hsa-miR-550       | 3 | MI0003762 | hsa-mir-550a-3 |
| 17272  | hsa-miR-551a      | 1 | MI0003556 | hsa-mir-551a   |
| 42917  | hsa-miR-551b      | 1 | MI0003575 | hsa-mir-551b   |
| 42781  | hsa-miR-551b*     | 1 | MI0003575 | hsa-mir-551b   |
| 17668  | hsa-miR-552       | 1 | MI0003557 | hsa-mir-552    |
| 29460  | hsa-miR-553       | 1 | MI0003558 | hsa-mir-553    |
| 42766  | hsa-miR-554       | 1 | MI0003559 | hsa-mir-554    |
| 17612  | hsa-miR-555       | 1 | MI0003561 | hsa-mir-555    |
| 42447  | hsa-miR-556-3p    | 1 | MI0003562 | hsa-mir-556    |
| 145758 | hsa-miR-556-5p    | 1 | MI0003562 | hsa-mir-556    |
| 42760  | hsa-miR-557       | 1 | MI0003563 | hsa-mir-557    |
| 17652  | hsa-miR-558       | 1 | MI0003564 | hsa-mir-558    |
| 31076  | hsa-miR-559       | 1 | MI0003565 | hsa-mir-559    |
| 31517  | hsa-miR-561       | 1 | MI0003567 | hsa-mir-561    |
| 30317  | hsa-miRPlus-C1106 | 1 | MI0003567 | hsa-mir-561    |
| 17536  | hsa-miR-562       | 1 | MI0003568 | hsa-mir-562    |
| 17569  | hsa-miR-563       | 1 | MI0003569 | hsa-mir-563    |
| 42944  | hsa-miR-564       | 1 | MI0003570 | hsa-mir-564    |
| 42772  | hsa-miR-566       | 1 | MI0003572 | hsa-mir-566    |
| 17634  | hsa-miR-567       | 1 | MI0003573 | hsa-mir-567    |
| 145744 | hsa-miR-568       | 1 | MI0003574 | hsa-mir-568    |
| 14854  | hsa-miR-569       | 1 | MI0003576 | hsa-mir-569    |

|        |                   |   |           |             |
|--------|-------------------|---|-----------|-------------|
| 17814  | hsa-miR-570       | 1 | MI0003577 | hsa-mir-570 |
| 17490  | hsa-miR-571       | 1 | MI0003578 | hsa-mir-571 |
| 42596  | hsa-miR-572       | 1 | MI0003579 | hsa-mir-572 |
| 17641  | hsa-miR-573       | 1 | MI0003580 | hsa-mir-573 |
| 27740  | hsa-miR-574-5p    | 1 | MI0003581 | hsa-mir-574 |
| 28966  | hsa-miR-574-3p    | 1 | MI0003581 | hsa-mir-574 |
| 17626  | hsa-miR-575       | 1 | MI0003582 | hsa-mir-575 |
| 17958  | hsa-miR-576-3p    | 1 | MI0003583 | hsa-mir-576 |
| 42446  | hsa-miR-576-5p    | 1 | MI0003583 | hsa-mir-576 |
| 42837  | hsa-miR-577       | 1 | MI0003584 | hsa-mir-577 |
| 17302  | hsa-miR-578       | 1 | MI0003585 | hsa-mir-578 |
| 42622  | hsa-miR-579       | 1 | MI0003586 | hsa-mir-579 |
| 17459  | hsa-miR-580       | 1 | MI0003587 | hsa-mir-580 |
| 14962  | hsa-miR-581       | 1 | MI0003588 | hsa-mir-581 |
| 42939  | blank             | 1 | MI0003589 | hsa-mir-582 |
| 29328  | hsa-miR-582-3p    | 1 | MI0003589 | hsa-mir-582 |
| 42800  | blank             | 1 | MI0003589 | hsa-mir-582 |
| 42544  | hsa-miR-582-5p    | 1 | MI0003589 | hsa-mir-582 |
| 17295  | hsa-miR-583       | 1 | MI0003590 | hsa-mir-583 |
| 145647 | hsa-miR-584       | 1 | MI0003591 | hsa-mir-584 |
| 17546  | hsa-miR-585       | 1 | MI0003592 | hsa-mir-585 |
| 42754  | hsa-miR-586       | 1 | MI0003594 | hsa-mir-586 |
| 17594  | hsa-miR-587       | 1 | MI0003595 | hsa-mir-587 |
| 17630  | hsa-miR-588       | 1 | MI0003597 | hsa-mir-588 |
| 17570  | hsa-miR-589*      | 1 | MI0003599 | hsa-mir-589 |
| 42542  | hsa-miR-589       | 1 | MI0003599 | hsa-mir-589 |
| 42567  | hsa-miR-590-3p    | 1 | MI0003602 | hsa-mir-590 |
| 17503  | hsa-miR-590-5p    | 1 | MI0003602 | hsa-mir-590 |
| 42482  | hsa-miR-591       | 1 | MI0003603 | hsa-mir-591 |
| 17312  | hsa-miR-592       | 1 | MI0003604 | hsa-mir-592 |
| 42478  | hsa-miR-593*      | 1 | MI0003605 | hsa-mir-593 |
| 42504  | hsa-miR-593       | 1 | MI0003605 | hsa-mir-593 |
| 17349  | hsa-miR-595       | 1 | MI0003607 | hsa-mir-595 |
| 145833 | hsa-miR-596       | 1 | MI0003608 | hsa-mir-596 |
| 42818  | hsa-miR-597       | 1 | MI0003609 | hsa-mir-597 |
| 46408  | hsa-miR-1322      | 2 | MI0003610 | hsa-mir-598 |
| 145648 | hsa-miR-598       | 1 | MI0003610 | hsa-mir-598 |
| 145989 | blank             | 1 | MI0003611 | hsa-mir-599 |
| 30592  | hsa-miR-599       | 1 | MI0003611 | hsa-mir-599 |
| 17955  | hsa-miRPlus-C1110 | 1 | MI0003611 | hsa-mir-599 |
| 17377  | hsa-miR-600       | 1 | MI0003613 | hsa-mir-600 |
| 17498  | hsa-miR-601       | 1 | MI0003614 | hsa-mir-601 |
| 42531  | hsa-miR-602       | 1 | MI0003615 | hsa-mir-602 |
| 17393  | hsa-miR-603       | 1 | MI0003616 | hsa-mir-603 |
| 17592  | hsa-miR-604       | 1 | MI0003617 | hsa-mir-604 |
| 145736 | hsa-miR-605       | 1 | MI0003618 | hsa-mir-605 |
| 29883  | hsa-miR-606       | 1 | MI0003619 | hsa-mir-606 |
| 32190  | hsa-miR-607       | 1 | MI0003620 | hsa-mir-607 |
| 42543  | hsa-miR-608       | 1 | MI0003621 | hsa-mir-608 |
| 17353  | hsa-miR-609       | 1 | MI0003622 | hsa-mir-609 |
| 17445  | hsa-miR-610       | 1 | MI0003623 | hsa-mir-610 |
| 145971 | hsa-miR-611       | 1 | MI0003624 | hsa-mir-611 |

|        |                   |   |           |              |
|--------|-------------------|---|-----------|--------------|
| 27551  | hsa-miR-612       | 1 | MI0003625 | hsa-mir-612  |
| 17577  | hsa-miR-613       | 1 | MI0003626 | hsa-mir-613  |
| 145750 | hsa-miR-614       | 1 | MI0003627 | hsa-mir-614  |
| 42690  | hsa-miR-615-5p    | 1 | MI0003628 | hsa-mir-615  |
| 27672  | hsa-miR-615-3p    | 1 | MI0003628 | hsa-mir-615  |
| 17289  | hsa-miR-616*      | 1 | MI0003629 | hsa-mir-616  |
| 42870  | hsa-miR-616       | 1 | MI0003629 | hsa-mir-616  |
| 17552  | hsa-miR-617       | 1 | MI0003631 | hsa-mir-617  |
| 17336  | hsa-miR-618       | 1 | MI0003632 | hsa-mir-618  |
| 42757  | hsa-miR-619       | 1 | MI0003633 | hsa-mir-619  |
| 32825  | hsa-miR-620       | 1 | MI0003634 | hsa-mir-620  |
| 46301  | hsa-miR-621       | 1 | MI0003635 | hsa-mir-621  |
| 17493  | hsa-miR-622       | 1 | MI0003636 | hsa-mir-622  |
| 46556  | hsa-miR-623       | 1 | MI0003637 | hsa-mir-623  |
| 42557  | hsa-miR-624*      | 1 | MI0003638 | hsa-mir-624  |
| 32095  | hsa-miR-624       | 1 | MI0003638 | hsa-mir-624  |
| 145831 | hsa-miR-625       | 1 | MI0003639 | hsa-mir-625  |
| 145740 | hsa-miR-625*      | 1 | MI0003639 | hsa-mir-625  |
| 33407  | hsa-miR-626       | 1 | MI0003640 | hsa-mir-626  |
| 17625  | hsa-miR-627       | 1 | MI0003641 | hsa-mir-627  |
| 42958  | hsa-miR-628-3p    | 1 | MI0003642 | hsa-mir-628  |
| 17870  | hsa-miR-628-5p    | 1 | MI0003642 | hsa-mir-628  |
| 17566  | hsa-miR-629*      | 1 | MI0003643 | hsa-mir-629  |
| 17961  | hsa-miR-629       | 1 | MI0003643 | hsa-mir-629  |
| 17327  | hsa-miR-630       | 1 | MI0003644 | hsa-mir-630  |
| 42700  | hsa-miR-631       | 1 | MI0003645 | hsa-mir-631  |
| 17444  | hsa-miR-632       | 1 | MI0003647 | hsa-mir-632  |
| 32711  | hsa-miR-633       | 1 | MI0003648 | hsa-mir-633  |
| 42591  | hsa-miR-634       | 1 | MI0003649 | hsa-mir-634  |
| 17391  | hsa-miR-635       | 1 | MI0003650 | hsa-mir-635  |
| 42750  | hsa-miR-636       | 1 | MI0003651 | hsa-mir-636  |
| 17354  | hsa-miR-637       | 1 | MI0003652 | hsa-mir-637  |
| 42832  | hsa-miR-638       | 1 | MI0003653 | hsa-mir-638  |
| 145962 | hsa-miR-639       | 1 | MI0003654 | hsa-mir-639  |
| 42758  | hsa-miR-640       | 1 | MI0003655 | hsa-mir-640  |
| 17530  | hsa-miR-641       | 1 | MI0003656 | hsa-mir-641  |
| 42679  | hsa-miR-642       | 2 | MI0003657 | hsa-mir-642a |
| 42679  | hsa-miR-642       | 2 | MI0016685 | hsa-mir-642b |
| 17325  | hsa-miR-643       | 1 | MI0003658 | hsa-mir-643  |
| 17563  | hsa-miR-644       | 1 | MI0003659 | hsa-mir-644  |
| 17613  | hsa-miR-645       | 1 | MI0003660 | hsa-mir-645  |
| 145963 | hsa-miR-646       | 1 | MI0003661 | hsa-mir-646  |
| 42746  | hsa-miR-647       | 1 | MI0003662 | hsa-mir-647  |
| 145715 | hsa-miR-648       | 1 | MI0003663 | hsa-mir-648  |
| 15619  | hsa-miR-649       | 1 | MI0003664 | hsa-mir-649  |
| 17593  | hsa-miR-650       | 1 | MI0003665 | hsa-mir-650  |
| 17394  | hsa-miR-651       | 1 | MI0003666 | hsa-mir-651  |
| 30209  | hsa-miRPlus-C1114 | 1 | MI0003666 | hsa-mir-651  |
| 145933 | hsa-miRPlus-C1115 | 1 | MI0003667 | hsa-mir-652  |
| 42827  | hsa-miR-652       | 1 | MI0003667 | hsa-mir-652  |
| 42607  | hsa-miR-653       | 1 | MI0003674 | hsa-mir-653  |
| 21498  | hsa-miR-654-3p    | 1 | MI0003676 | hsa-mir-654  |

|        |                   |   |           |              |
|--------|-------------------|---|-----------|--------------|
| 42843  | hsa-miR-654-5p    | 1 | MI0003676 | hsa-mir-654  |
| 145696 | hsa-miR-655       | 1 | MI0003677 | hsa-mir-655  |
| 29736  | hsa-miR-656       | 1 | MI0003678 | hsa-mir-656  |
| 17460  | hsa-miR-657       | 1 | MI0003681 | hsa-mir-657  |
| 145842 | hsa-miR-658       | 1 | MI0003682 | hsa-mir-658  |
| 42749  | hsa-miR-659       | 1 | MI0003683 | hsa-mir-659  |
| 17338  | hsa-miR-660       | 1 | MI0003684 | hsa-mir-660  |
| 42535  | hsa-miR-661       | 1 | MI0003669 | hsa-mir-661  |
| 145839 | hsa-miR-662       | 1 | MI0003670 | hsa-mir-662  |
| 42807  | hsa-miR-663       | 1 | MI0003672 | hsa-mir-663  |
| 145976 | hsa-miR-663b      | 1 | MI0006336 | hsa-mir-663b |
| 46829  | hsa-miR-664*      | 1 | MI0006442 | hsa-mir-664  |
| 145973 | hsa-miR-664       | 1 | MI0006442 | hsa-mir-664  |
| 145768 | hsa-miR-665       | 1 | MI0005563 | hsa-mir-665  |
| 145701 | hsa-miR-668       | 1 | MI0003761 | hsa-mir-668  |
| 146006 | hsa-miR-670       | 1 | MI0003933 | hsa-mir-670  |
| 42525  | hsa-miR-671-3p    | 1 | MI0003760 | hsa-mir-671  |
| 145716 | hsa-miR-671-5p    | 1 | MI0003760 | hsa-mir-671  |
| 42761  | hsa-miR-675       | 1 | MI0005416 | hsa-mir-675  |
| 42859  | hsa-miR-675*      | 1 | MI0005416 | hsa-mir-675  |
| 46452  | hsa-miRPlus-F1057 | 1 | MI0016436 | hsa-mir-676  |
| 29490  | hsa-miR-7         | 3 | MI0000263 | hsa-mir-7-1  |
| 11277  | hsa-miR-7-1*      | 1 | MI0000263 | hsa-mir-7-1  |
| 29490  | hsa-miR-7         | 3 | MI0000264 | hsa-mir-7-2  |
| 42964  | hsa-miR-7-2*      | 1 | MI0000264 | hsa-mir-7-2  |
| 29490  | hsa-miR-7         | 3 | MI0000265 | hsa-mir-7-3  |
| 17347  | hsa-miR-708*      | 1 | MI0005543 | hsa-mir-708  |
| 29190  | hsa-miR-708       | 1 | MI0005543 | hsa-mir-708  |
| 146196 | hsa-miR-711       | 1 | MI0012488 | hsa-mir-711  |
| 146064 | hsa-miR-718       | 1 | MI0012489 | hsa-mir-718  |
| 42751  | hsa-miR-720       | 1 | MI0006654 | hsa-mir-720  |
| 42970  | hsa-miR-744*      | 1 | MI0005559 | hsa-mir-744  |
| 27568  | hsa-miR-744       | 1 | MI0005559 | hsa-mir-744  |
| 46273  | hsa-miRPlus-F1166 | 1 | MI0003757 | hsa-mir-758  |
| 28759  | hsa-miR-758       | 1 | MI0003757 | hsa-mir-758  |
| 23767  | hsa-miR-759       | 1 | MI0004065 | hsa-mir-759  |
| 42852  | hsa-miR-760       | 1 | MI0005567 | hsa-mir-760  |
| 32608  | hsa-miR-761       | 1 | MI0003941 | hsa-mir-761  |
| 146107 | hsa-miR-762       | 1 | MI0003892 | hsa-mir-762  |
| 27773  | blank             | 1 | MI0003944 | hsa-mir-764  |
| 146096 | hsa-miR-764       | 1 | MI0003944 | hsa-mir-764  |
| 145805 | hsa-miR-765       | 1 | MI0005116 | hsa-mir-765  |
| 46474  | hsa-miRPlus-F1158 | 1 | MI0003836 | hsa-mir-766  |
| 145847 | hsa-miR-766       | 1 | MI0003836 | hsa-mir-766  |
| 28009  | hsa-miR-767-5p    | 1 | MI0003763 | hsa-mir-767  |
| 146111 | blank             | 1 | MI0003763 | hsa-mir-767  |
| 28396  | hsa-miR-767-3p    | 1 | MI0003763 | hsa-mir-767  |
| 32891  | hsa-miR-769-5p    | 1 | MI0003834 | hsa-mir-769  |
| 42828  | hsa-miR-769-3p    | 1 | MI0003834 | hsa-mir-769  |
| 42492  | hsa-miRPlus-A1031 | 1 | MI0005118 | hsa-mir-770  |
| 28251  | hsa-miR-770-5p    | 1 | MI0005118 | hsa-mir-770  |
| 30442  | hsa-miR-802       | 1 | MI0003906 | hsa-mir-802  |

|        |                   |   |           |               |
|--------|-------------------|---|-----------|---------------|
| 17917  | hsa-miR-873       | 1 | MI0005564 | hsa-mir-873   |
| 42808  | hsa-miR-874       | 1 | MI0005532 | hsa-mir-874   |
| 145721 | hsa-miR-875-5p    | 1 | MI0005541 | hsa-mir-875   |
| 17817  | hsa-miR-875-3p    | 1 | MI0005541 | hsa-mir-875   |
| 28884  | hsa-miR-876-3p    | 1 | MI0005542 | hsa-mir-876   |
| 42940  | hsa-miR-876-5p    | 1 | MI0005542 | hsa-mir-876   |
| 30033  | hsa-miR-877       | 1 | MI0005561 | hsa-mir-877   |
| 42771  | hsa-miR-877*      | 1 | MI0005561 | hsa-mir-877   |
| 46259  | hsa-miR-885-5p    | 1 | MI0005560 | hsa-mir-885   |
| 42633  | hsa-miR-885-3p    | 1 | MI0005560 | hsa-mir-885   |
| 145724 | hsa-miR-887       | 1 | MI0005562 | hsa-mir-887   |
| 42825  | hsa-miR-888*      | 1 | MI0005537 | hsa-mir-888   |
| 28889  | hsa-miR-888       | 1 | MI0005537 | hsa-mir-888   |
| 42556  | hsa-miR-889       | 1 | MI0005540 | hsa-mir-889   |
| 28047  | hsa-miR-890       | 1 | MI0005533 | hsa-mir-890   |
| 27961  | hsa-miR-891a      | 1 | MI0005524 | hsa-mir-891a  |
| 21501  | hsa-miR-891b      | 1 | MI0005534 | hsa-mir-891b  |
| 42858  | hsa-miR-892a      | 1 | MI0005528 | hsa-mir-892a  |
| 42493  | hsa-miR-892b      | 1 | MI0005538 | hsa-mir-892b  |
| 29852  | hsa-miR-9*        | 3 | MI0000466 | hsa-mir-9-1   |
| 4040   | blank             | 3 | MI0000466 | hsa-mir-9-1   |
| 145649 | hsa-miR-9         | 3 | MI0000466 | hsa-mir-9-1   |
| 29852  | hsa-miR-9*        | 3 | MI0000467 | hsa-mir-9-2   |
| 4040   | blank             | 3 | MI0000467 | hsa-mir-9-2   |
| 145649 | hsa-miR-9         | 3 | MI0000467 | hsa-mir-9-2   |
| 29852  | hsa-miR-9*        | 3 | MI0000468 | hsa-mir-9-3   |
| 4040   | blank             | 3 | MI0000468 | hsa-mir-9-3   |
| 145649 | hsa-miR-9         | 3 | MI0000468 | hsa-mir-9-3   |
| 42932  | hsa-miR-920       | 1 | MI0005712 | hsa-mir-920   |
| 46507  | hsa-miR-921       | 1 | MI0005713 | hsa-mir-921   |
| 42683  | hsa-miR-922       | 1 | MI0005714 | hsa-mir-922   |
| 42788  | hsa-miR-924       | 1 | MI0005716 | hsa-mir-924   |
| 42728  | blank             | 2 | MI0000093 | hsa-mir-92a-1 |
| 145693 | hsa-miR-92a       | 2 | MI0000093 | hsa-mir-92a-1 |
| 42926  | hsa-miR-92a-1*    | 1 | MI0000093 | hsa-mir-92a-1 |
| 42728  | blank             | 2 | MI0000094 | hsa-mir-92a-2 |
| 145693 | hsa-miR-92a       | 2 | MI0000094 | hsa-mir-92a-2 |
| 42801  | hsa-miR-92a-2*    | 1 | MI0000094 | hsa-mir-92a-2 |
| 145884 | blank             | 1 | MI0003560 | hsa-mir-92b   |
| 42717  | hsa-miR-92b*      | 1 | MI0003560 | hsa-mir-92b   |
| 17718  | hsa-miR-92b       | 1 | MI0003560 | hsa-mir-92b   |
| 30687  | hsa-miR-93        | 1 | MI0000095 | hsa-mir-93    |
| 42747  | hsa-miR-93*       | 1 | MI0000095 | hsa-mir-93    |
| 42539  | hsa-miR-933       | 1 | MI0005755 | hsa-mir-933   |
| 17863  | hsa-miR-934       | 1 | MI0005756 | hsa-mir-934   |
| 145742 | hsa-miR-935       | 1 | MI0005757 | hsa-mir-935   |
| 42869  | hsa-miR-936       | 1 | MI0005758 | hsa-mir-936   |
| 42514  | hsa-miR-937       | 1 | MI0005759 | hsa-mir-937   |
| 42776  | hsa-miR-938       | 1 | MI0005760 | hsa-mir-938   |
| 46296  | hsa-miRPlus-F1036 | 1 | MI0005761 | hsa-mir-939   |
| 145980 | hsa-miR-939       | 1 | MI0005761 | hsa-mir-939   |
| 146115 | hsa-miR-940       | 1 | MI0005762 | hsa-mir-940   |

|        |              |   |           |               |
|--------|--------------|---|-----------|---------------|
| 42814  | hsa-miR-941  | 4 | MI0005763 | hsa-mir-941-1 |
| 42814  | hsa-miR-941  | 4 | MI0005764 | hsa-mir-941-2 |
| 42814  | hsa-miR-941  | 4 | MI0005765 | hsa-mir-941-3 |
| 42814  | hsa-miR-941  | 4 | MI0005766 | hsa-mir-941-4 |
| 42608  | hsa-miR-942  | 1 | MI0005767 | hsa-mir-942   |
| 42696  | hsa-miR-943  | 1 | MI0005768 | hsa-mir-943   |
| 42873  | hsa-miR-944  | 1 | MI0005769 | hsa-mir-944   |
| 11181  | hsa-miR-95   | 1 | MI0000097 | hsa-mir-95    |
| 13147  | hsa-miR-96   | 1 | MI0000098 | hsa-mir-96    |
| 42971  | hsa-miR-96*  | 1 | MI0000098 | hsa-mir-96    |
| 11182  | hsa-miR-98   | 1 | MI0000100 | hsa-mir-98    |
| 145651 | hsa-miR-99a* | 1 | MI0000101 | hsa-mir-99a   |
| 42708  | hsa-miR-99a  | 1 | MI0000101 | hsa-mir-99a   |
| 11184  | hsa-miR-99b  | 1 | MI0000746 | hsa-mir-99b   |
| 17898  | hsa-miR-99b* | 1 | MI0000746 | hsa-mir-99b   |

Figure S1

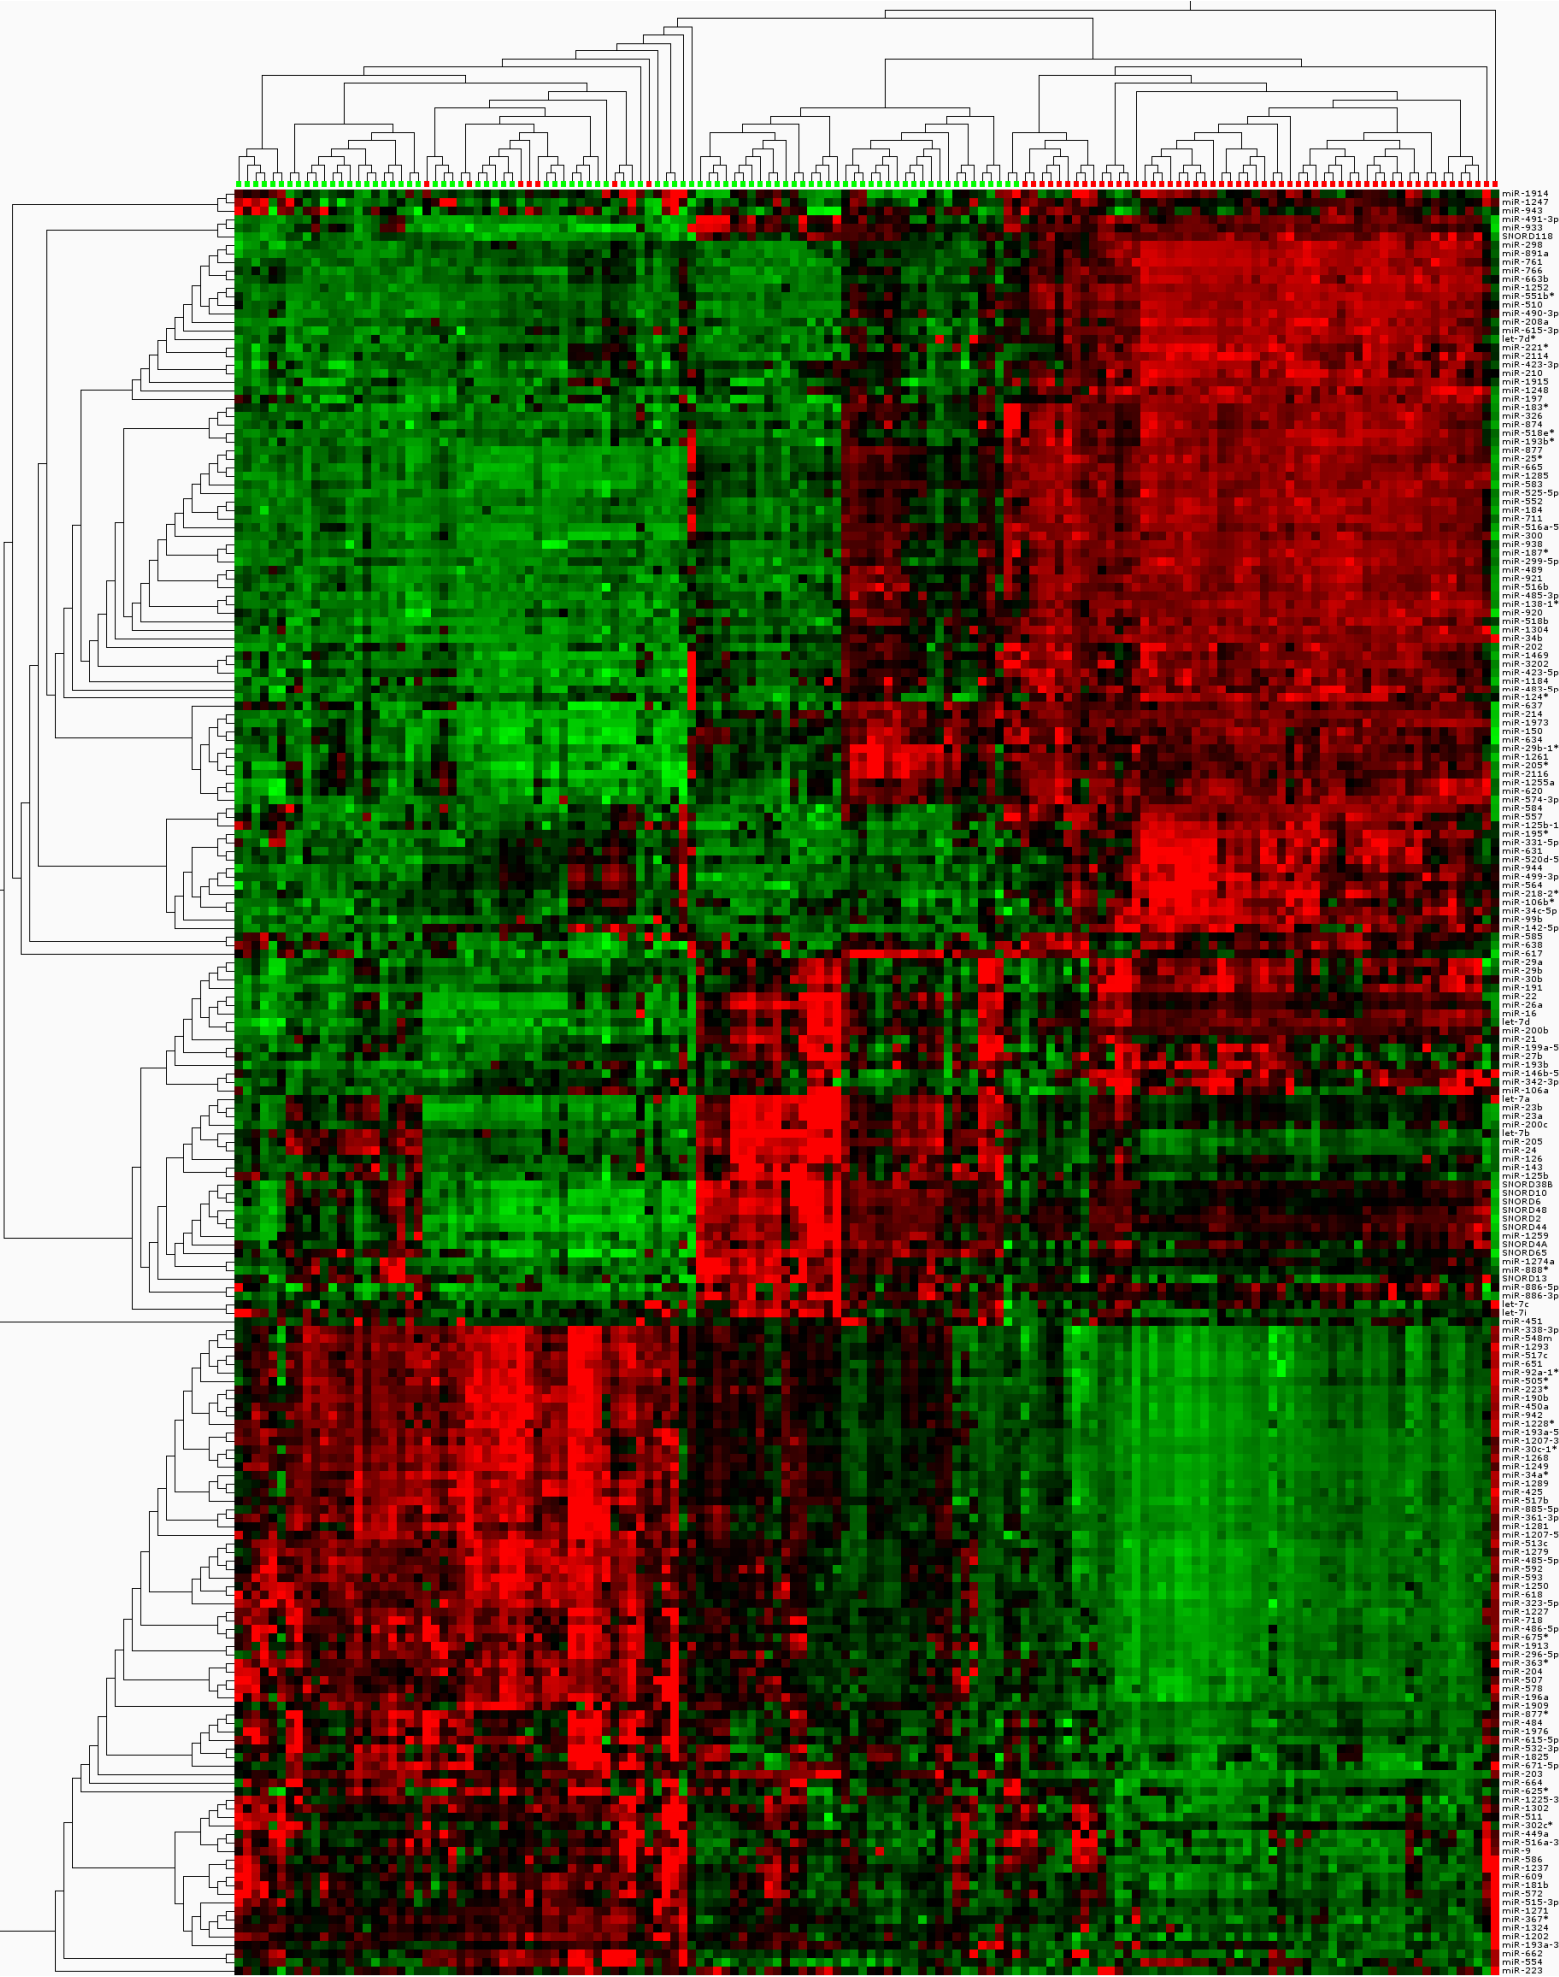

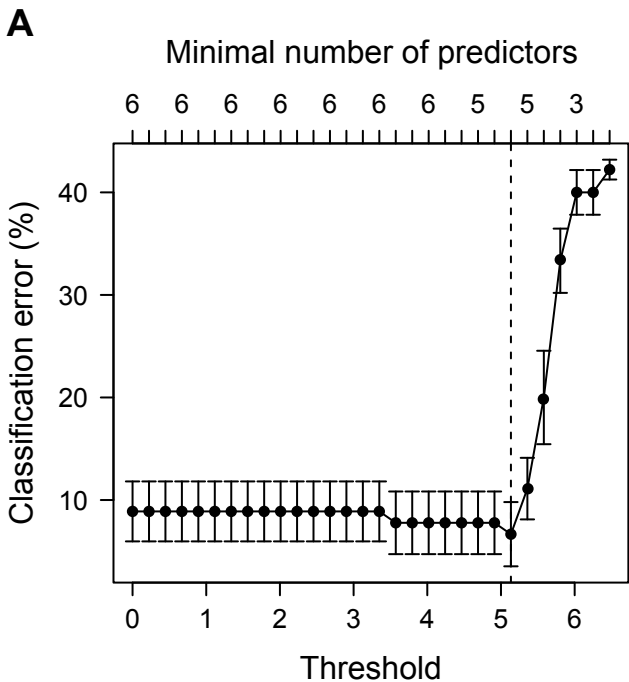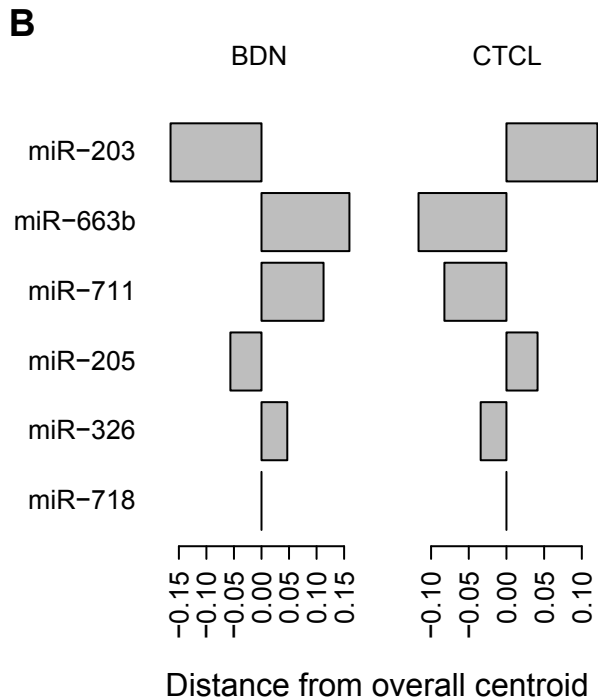

Figure S2



Figure S3

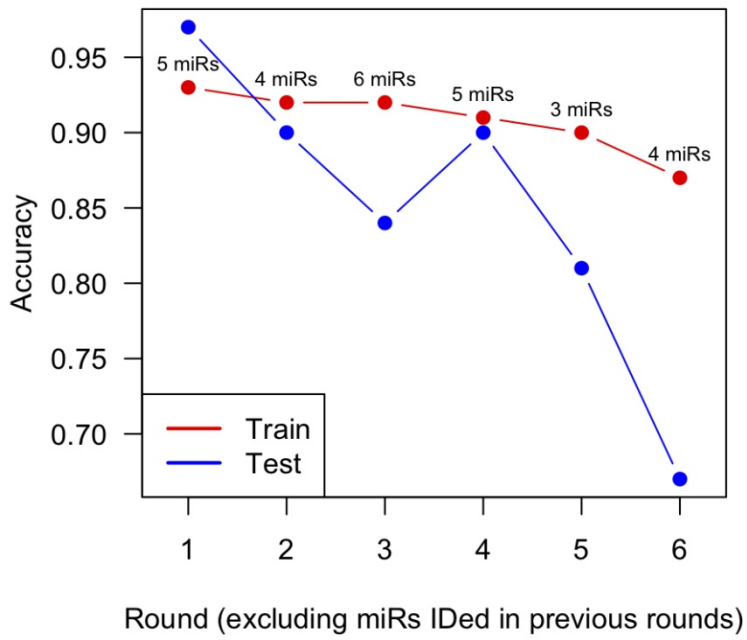

Figure S4

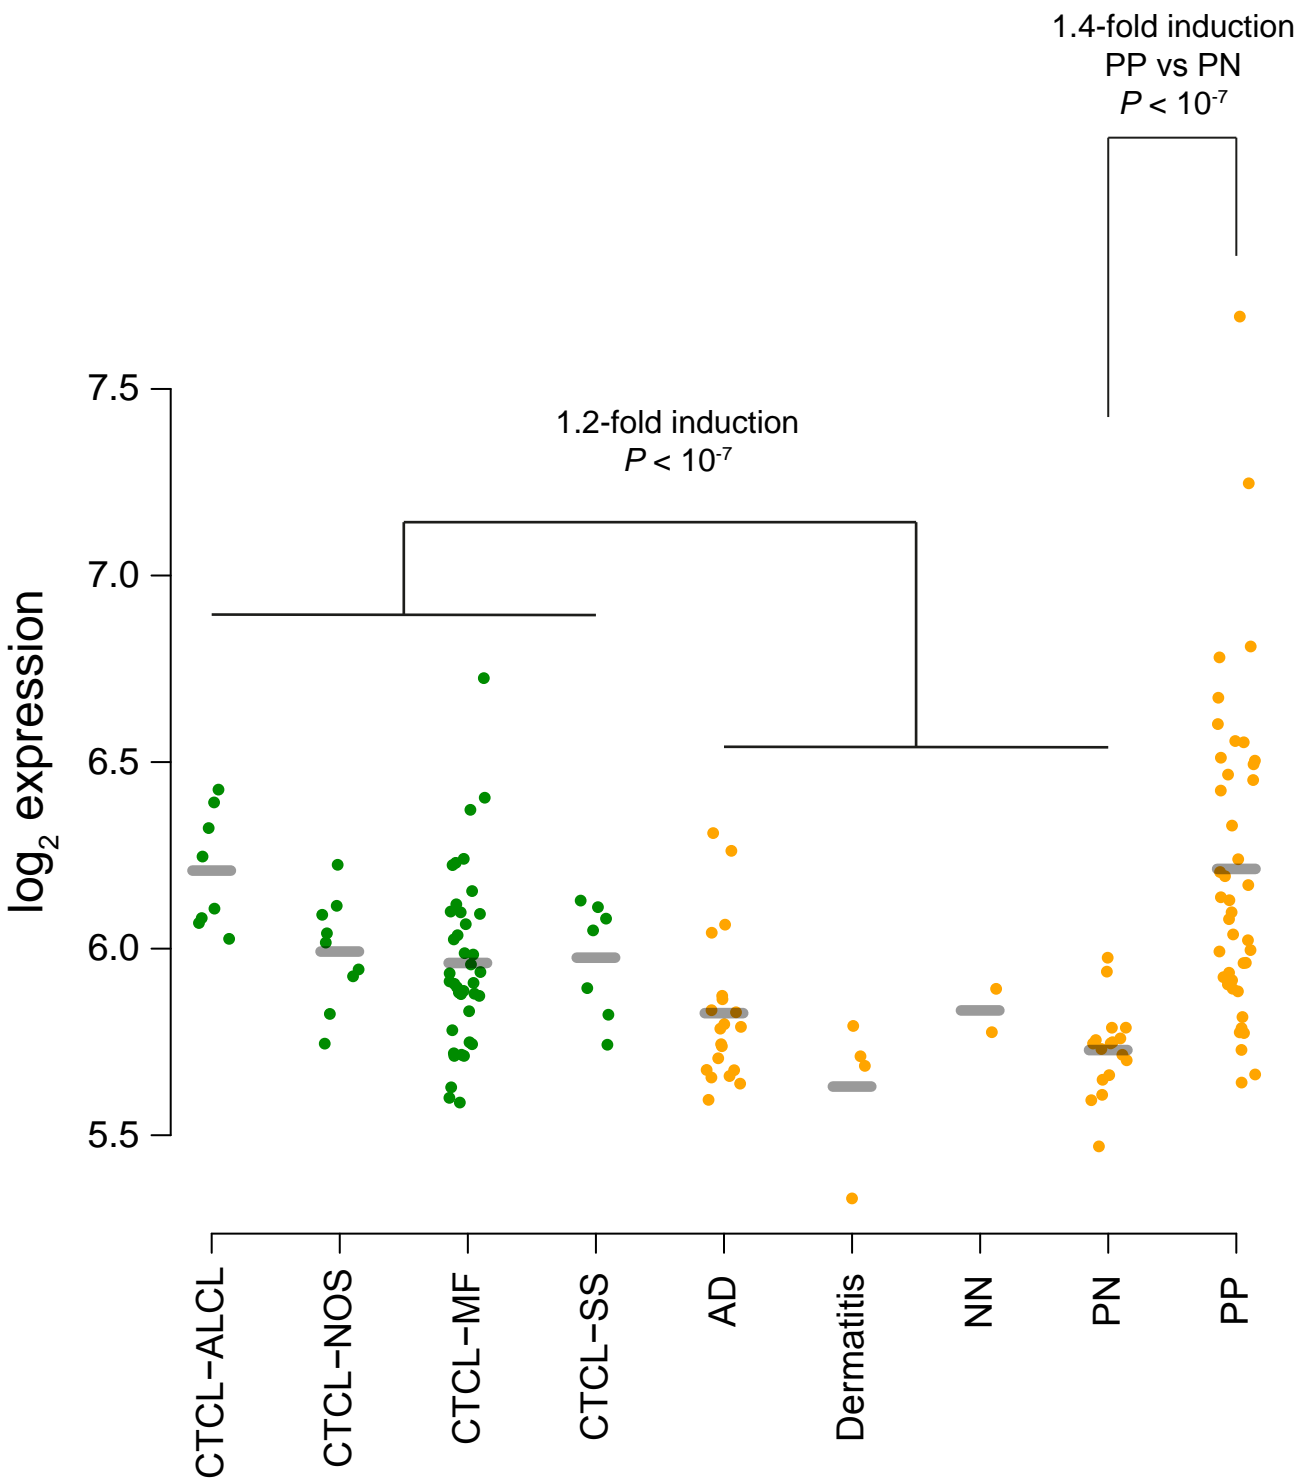

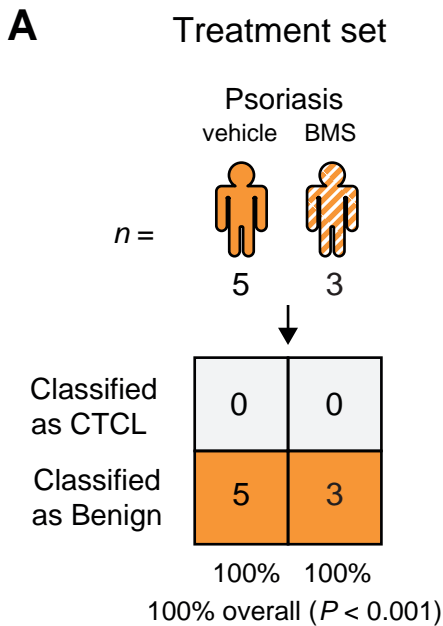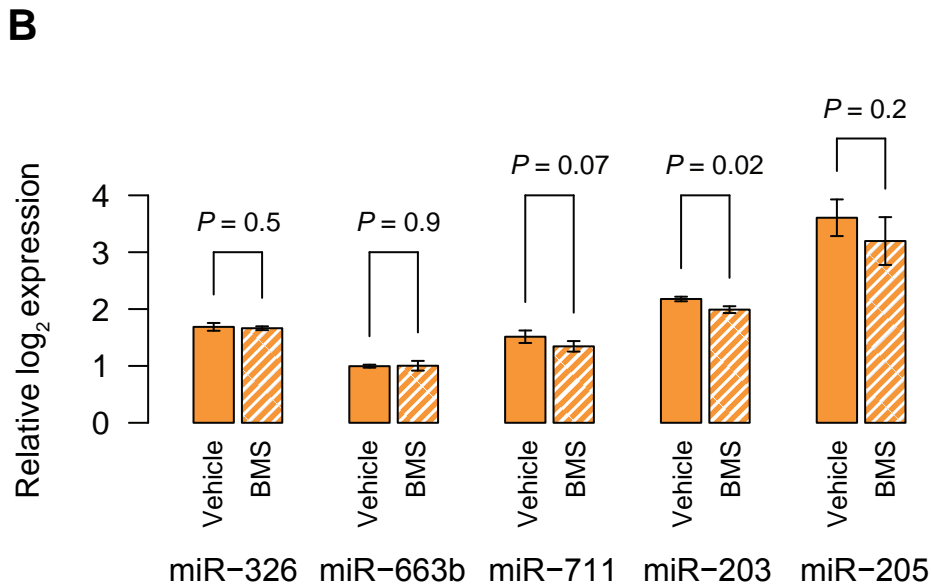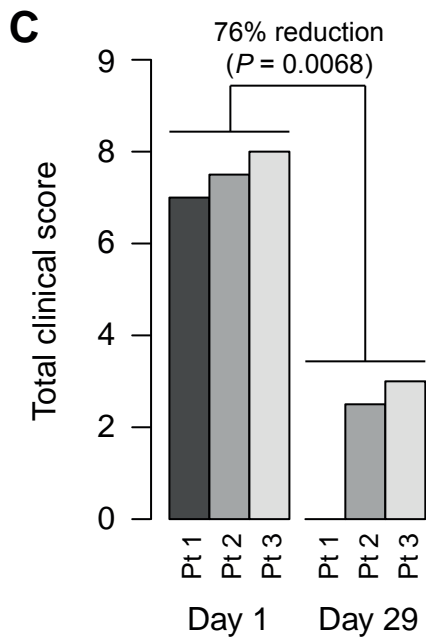

Figure S6

# miR-711

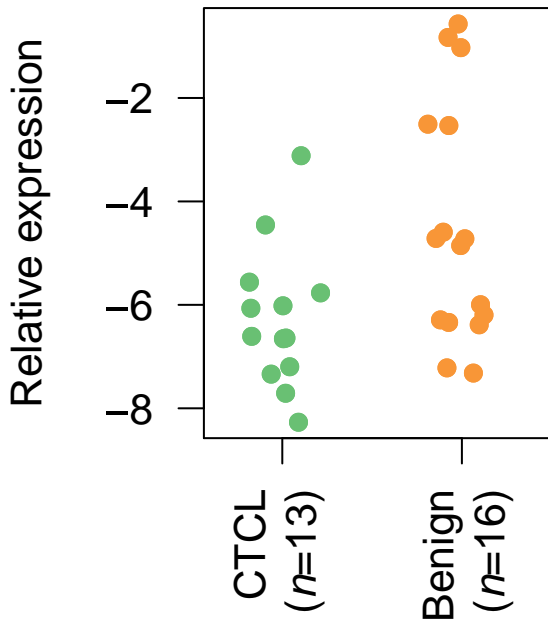

Figure S7

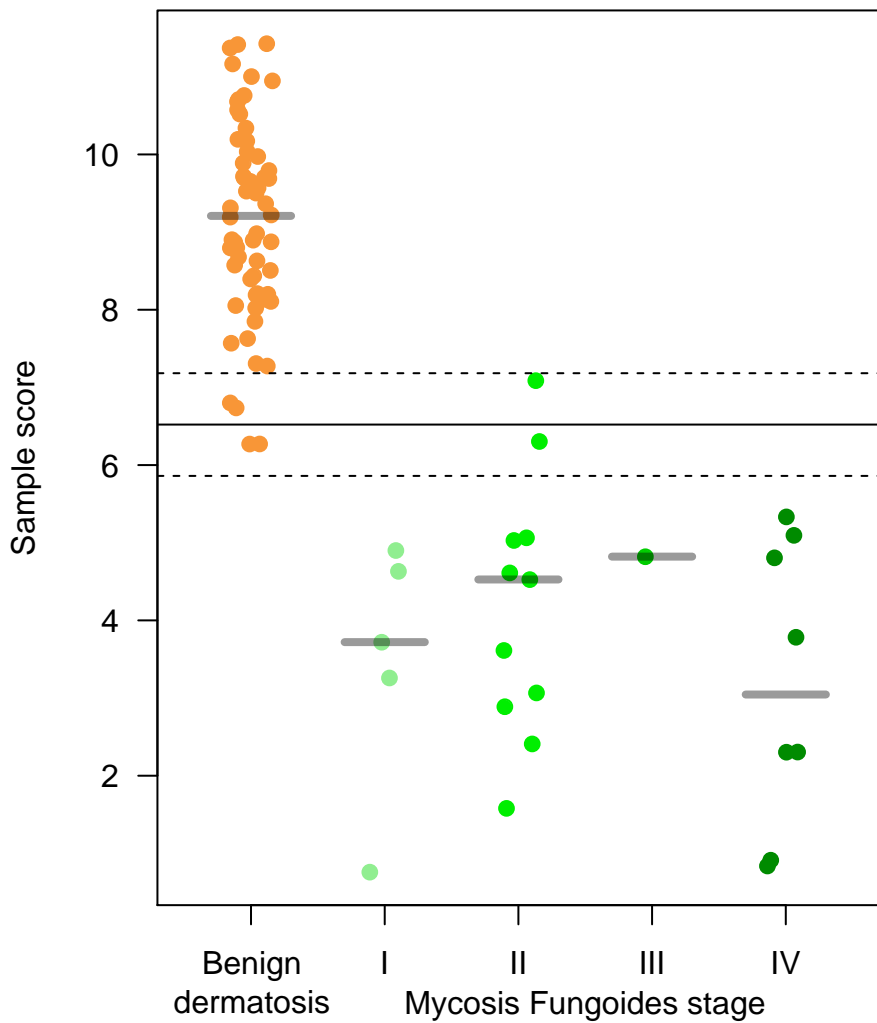

Supplement: supp_blood-2011-06-358382_Document1.pdf [file supp_blood-2011-06-358382_Document1.pdf]
